# Supplementary material for: Swimming under elevated hydrostatic pressure increases glycolytic activity in gas gland cells of the European eel
Source: PLoS One. 2020 Sep 30;15(9):e0239627. doi: 10.1371/journal.pone.0239627 (PMC7526912; doi:10.1371/journal.pone.0239627)
Supplement: S3 Table — (XLSX) [file pone.0239627.s003.xlsx]

## Sheet: Sheet1
ID	Name	SD relative expression value	Exercised Damaged relative expression value	foldChange	pval	Description
g39819	1433g	39.3994	75.9978	1.92891	0.0359706	14-3-3 protein gamma
g10889	1433z	1514.98	4242.8	2.80056	0.00676054	14-3-3 protein zeta
g34639	143ga	50.7943	262.248	5.16293	1.8449e-07	14-3-3 protein gamma-a
g33607	1b52	121.31	28.9883	0.23896	0.000148224	hla class i histocompatibility b-52 alpha chain
g27428	2a5a	31.1846	111.364	3.57113	6.24633e-05	serine threonine-protein phosphatase 2a 56 kda regulatory subunit alpha isoform
g30631	2a5a	63.0103	124.444	1.97498	0.0367188	serine threonine-protein phosphatase 2a 56 kda regulatory subunit alpha isoform
g3293	2a5b	9.037	1.73391	0.191868	0.0082979	serine threonine-protein phosphatase 2a 56 kda regulatory subunit beta isoform
g2588	2a5d	12.6514	3.74167	0.295751	0.00310617	serine threonine-protein phosphatase 2a 56 kda regulatory subunit delta isoform
g2590	2a5g	310.28	178.73	0.576027	0.0362436	serine threonine-protein phosphatase 2a 56 kda regulatory subunit gamma isoform
g40842	2aaa	66.074	255.729	3.87035	9.33477e-05	serine threonine-protein phosphatase 2a 65 kda regulatory subunit a alpha isoform
g37439	2aab	19.9583	88.1652	4.41746	1.21885e-05	serine threonine-protein phosphatase 2a 65 kda regulatory subunit a beta isoform
g31133	2aab	27.3523	66.9506	2.44771	0.0431117	serine threonine-protein phosphatase 2a 65 kda regulatory subunit a beta isoform
g28083	2aab	109.242	240.767	2.20396	0.0185886	serine threonine-protein phosphatase 2a 65 kda regulatory subunit a beta isoform
g691	2aba	1207.15	493.567	0.408868	0.0151282	serine threonine-protein phosphatase 2a 55 kda regulatory subunit b alpha isoform
g39643	2abb	2.72941	48.6589	17.8276	3.74176e-12	serine threonine-protein phosphatase 2a 55 kda regulatory subunit b beta isoform
g41879	2abb	9.0765	29.5254	3.25295	0.00983453	serine threonine-protein phosphatase 2a 55 kda regulatory subunit b beta isoform
g25844	2abb	15.9021	33.5585	2.11032	0.0416635	serine threonine-protein phosphatase 2a 55 kda regulatory subunit b beta isoform
g6544	2abd	294.634	163.079	0.553497	0.0320824	serine threonine-protein phosphatase 2a 55 kda regulatory subunit b delta isoform
g5813	3bp5	134.725	60.8395	0.451584	0.00851029	sh3 domain-binding protein 5 short=sh3bp-5
g276	3bp5l	96.5262	37.8935	0.392573	0.0205586	sh3 domain-binding protein 5-like short=sh3bp-5-like
g19851	3hao	169.789	553.502	3.25994	5.73432e-05	3-hydroxyanthranilate -dioxygenase
g28932	4eb3l	56.7046	256.478	4.52305	7.83204e-05	eukaryotic translation initiation factor 4e-binding protein 3-like short=4e-bp3 short=eif4e-binding protein 3
g42450	4eb3l	199.975	570.62	2.85347	0.00139951	eukaryotic translation initiation factor 4e-binding protein 3-like short=4e-bp3 short=eif4e-binding protein 3
g28208	4eb3l	45.441	109.809	2.41652	0.0176714	eukaryotic translation initiation factor 4e-binding protein 3-like short=4e-bp3 short=eif4e-binding protein 3
g4061	4f2	397.485	879.32	2.21221	0.0121329	4f2 cell-surface antigen heavy chain short=4f2hc ame: cd_antigen=cd98
g23117	4f2	223.204	124.507	0.557818	0.0304692	4f2 cell-surface antigen heavy chain short=4f2hc ame: cd_antigen=cd98
g24444	5ht3a	21.3304	8.88515	0.416548	0.0384159	5-hydroxytryptamine receptor 3a short=5-ht3-a short=5-ht3a
g5663	5nt3l	175.502	94.6452	0.539283	0.0355842	cytosolic 5 -nucleotidase iii-like protein short=cn-iii-like protein
g44574	5ntc	6.38247	29.5739	4.63361	3.8853e-05	cytosolic purine 5 -nucleotidase
g20294	5ntc	222.273	124.946	0.562127	0.047622	cytosolic purine 5 -nucleotidase
g27246	5ntc	1201.82	605.295	0.503647	0.0479745	cytosolic purine 5 -nucleotidase
g21953	5ntc	357.067	176.929	0.495507	0.0156486	cytosolic purine 5 -nucleotidase
g21848	6pgl	113.279	225.873	1.99395	0.0162767	6-phosphogluconolactonase short=6pgl
g8262	a16a1	126.286	263.619	2.08748	0.00941283	aldehyde dehydrogenase family 16 member a1
g24629	a16l1	571	295.27	0.517111	0.0220933	autophagy-related protein 16-1
g13222	a1a1b	390.181	685.406	1.75664	0.0458931	alcohol dehydrogenase b
g3378	a2mg	23812.5	85157.3	3.57615	0.0146937	alpha-2-macroglobulin short=alpha-2-m flags: precursor
g14226	a33	128.306	26.4716	0.206315	1.72797e-05	zinc-binding protein a33
g19804	a33	22.0752	2.87263	0.130129	0.00183996	zinc-binding protein a33
g39477	a4	3.48174	18.952	5.44327	6.80393e-05	amyloid beta a4 protein
g25086	a4	61.2387	200.32	3.27114	0.000142134	amyloid beta a4 protein
g43503	a4	11.2508	28.7052	2.55138	0.00903117	amyloid beta a4 protein
g21601	aakg1	10.5517	3.51119	0.33276	0.0244409	5 -amp-activated protein kinase subunit gamma-1 short=ampk gamma1 short=ampk subunit gamma-1 short=ampkg
g35288	aakg2	5.72336	40.6727	7.10645	0.0029713	5 -amp-activated protein kinase subunit gamma-2 short=ampk gamma2 short=ampk subunit gamma-2
g2908	aapk1	270.387	138.651	0.512789	0.0160606	5 -amp-activated protein kinase catalytic subunit alpha-1 short=ampk subunit alpha-1
g8672	aapk2	73.7444	21.3125	0.289006	0.00015395	5 -amp-activated protein kinase catalytic subunit alpha-2 short=ampk subunit alpha-2
g2337	aass	125.393	533.807	4.25708	0.00133541	alpha-aminoadipic semialdehyde mitochondrial
g2336	aass	506.203	1253.52	2.47632	0.0171982	alpha-aminoadipic semialdehyde mitochondrial
g3283	aatc	69.5378	32.7631	0.471155	0.0183724	aspartate cytoplasmic
g29709	aatm	94.5821	499.48	5.28091	1.06026e-07	aspartate mitochondrial short=m
g33527	aatm	406.084	1350.77	3.32633	0.009904	aspartate mitochondrial short=m
g43394	aatm	502.66	1322.98	2.63195	0.0442495	aspartate mitochondrial short=m
g30866	abca1	143.071	81.2712	0.568048	0.0400984	atp-binding cassette sub-family a member 1
g39350	abca1	108.902	60.1415	0.552254	0.0374134	atp-binding cassette sub-family a member 1
g38170	abca1	48.6686	26.2333	0.539019	0.0414404	atp-binding cassette sub-family a member 1
g35787	abca1	58.0268	21.1857	0.365101	0.00110837	atp-binding cassette sub-family a member 1
g4770	abca1	1217.86	435.964	0.357976	0.0119262	atp-binding cassette sub-family a member 1
g17403	abca1	210.543	69.4063	0.329654	0.000105949	atp-binding cassette sub-family a member 1
g31427	abca1	1258.86	327.58	0.260219	2.08226e-06	atp-binding cassette sub-family a member 1
g41639	abca3	65.4377	260.27	3.97736	5.93649e-06	atp-binding cassette sub-family a member 3
g26649	abcb6	2.96993	10.5292	3.54526	0.00961782	atp-binding cassette sub-family b member mitochondrial
g30693	abcb6	2.96095	8.77156	2.96241	0.0261669	atp-binding cassette sub-family b member mitochondrial
g26841	abcb6	4.82122	13.0942	2.71595	0.0193135	atp-binding cassette sub-family b member mitochondrial
g3647	abcba	264.592	139.498	0.52722	0.029851	atp-binding cassette sub-family b member mitochondrial
g26749	abcc9	54.9828	23.0782	0.419734	0.0441637	atp-binding cassette sub-family c member 9
g19365	abcc9	91.0511	29.5583	0.324634	0.00523608	atp-binding cassette sub-family c member 9
g2352	abccb	136.972	333.098	2.43187	0.00304285	atp-binding cassette sub-family c member 11
g19773	abce1	2434.93	5770.92	2.37005	0.00349348	atp-binding cassette sub-family e member 1
g36846	abcf1	35.9713	194.176	5.39808	3.13514e-06	atp-binding cassette sub-family f member 1
g28332	abcf1	684.76	1863.91	2.72199	0.000968591	atp-binding cassette sub-family f member 1
g31299	abcf1	178.464	382.462	2.14307	0.034024	atp-binding cassette sub-family f member 1
g23518	abcf2	40.1848	181.952	4.52788	0.00942595	atp-binding cassette sub-family f member 2
g36730	abcf2	15.1149	66.75	4.41617	0.00250597	atp-binding cassette sub-family f member 2
g36941	abcf2	27.015	99.8891	3.69754	0.00407886	atp-binding cassette sub-family f member 2
g34218	abcf2	32.5871	118.484	3.63592	0.00554115	atp-binding cassette sub-family f member 2
g43046	abcf2	68.0755	230.625	3.38779	0.00632966	atp-binding cassette sub-family f member 2
g43992	abcf2	41.8616	112.749	2.69338	0.0255579	atp-binding cassette sub-family f member 2
g17806	abcg1	83.022	15.3509	0.184901	2.90584e-07	atp-binding cassette sub-family g member 1
g19093	abcg8	1.23268	0	0	0.0429635	atp-binding cassette sub-family g member 8
g5879	abh15	921.278	469.897	0.510049	0.0182868	abhydrolase domain-containing protein 15 flags: precursor
g42212	abh2a	40.3403	83.4947	2.06976	0.0237262	abhydrolase domain-containing protein 2-a
g16555	abhd3	517.144	136.577	0.2641	0.00337303	abhydrolase domain-containing protein 3
g24427	abhd4	254.837	809.112	3.17502	0.000142769	abhydrolase domain-containing protein 4
g9090	abi2	337.478	102.834	0.304714	5.52919e-05	abl interactor 2
g18872	abl1	815.744	453.189	0.555553	0.0242963	tyrosine-protein kinase abl1
g40555	abl2	2.09383	11.4699	5.47796	0.000674834	tyrosine-protein kinase abl2
g10783	ablm1	21.7812	98.3422	4.51501	2.86199e-05	actin-binding lim protein 1 short=ablim-1
g7625	ablm2	50.281	15.3692	0.305667	0.00572191	actin-binding lim protein 2 short=ablim-2
g7626	ablm2	22.8879	4.59018	0.20055	0.0159854	actin-binding lim protein 2 short=ablim-2
g30464	abr	45.3641	97.3021	2.14491	0.025234	active breakpoint cluster region-related protein
g21692	abr	89.1647	170.91	1.91679	0.043072	active breakpoint cluster region-related protein
g30918	abr	104.835	39.848	0.380101	0.000724653	active breakpoint cluster region-related protein
g27083	acac	132.013	51.0179	0.38646	0.00150421	acetyl- carboxylase short=acc includes:
g29266	acacb	106.536	56.3124	0.528574	0.0382629	acetyl- carboxylase 2
g14311	acads	116.404	308.501	2.65027	0.00173993	short-chain specific acyl- mitochondrial short=scad
g11204	acam	33.3411	11.9866	0.359514	0.00169404	adipocyte adhesion molecule flags: precursor
g36588	acap2	1.60096	7.1442	4.46246	0.00706274	arf-gap with coiled- ank repeat and ph domain-containing protein 2
g2056	acap2	431.352	208.249	0.482781	0.0258362	arf-gap with coiled- ank repeat and ph domain-containing protein 2
g13107	acap3	21.9704	8.49098	0.386473	0.00936186	arf-gap with coiled- ank repeat and ph domain-containing protein 3
g5163	acatn	284.321	139.722	0.491422	0.0132985	acetyl-coenzyme a transporter 1 short=at-1 short=acetyl- transporter 1
g25723	acatn	388.195	162.781	0.419328	0.00162313	acetyl-coenzyme a transporter 1 short=at-1 short=acetyl- transporter 1
g39027	acbd6	12.7542	91.9279	7.20767	4.50314e-09	acyl- -binding domain-containing protein 6
g21026	acbg2	464.045	220.149	0.474414	0.0104127	long-chain-fatty-acid-- ligase acsbg2
g11435	acbg2	69.1389	23.9776	0.346803	0.00130131	long-chain-fatty-acid-- ligase acsbg2
g29214	acd10	19.6126	45.5252	2.32123	0.00898911	acyl- dehydrogenase family member 10 short=acad-10
g6437	acd11	126.952	258.709	2.03784	0.0100797	acyl- dehydrogenase family member 11 short=acad-11
g11666	ace	130.956	290.772	2.22038	0.00287571	angiotensin-converting enzyme short=ace
g12443	ace	98.8987	23.6545	0.239179	0.0439687	angiotensin-converting enzyme short=ace
g6077	ace2	6.25057	22.7475	3.63926	0.0118477	angiotensin-converting enzyme 2
g8691	acer3	173.334	92.9456	0.536222	0.0347654	alkaline ceramidase 3 short= ase 3 short=alkaline cdase 3
g306	acha4	271.966	609.294	2.24033	0.00483378	neuronal acetylcholine receptor subunit alpha-4 flags: precursor
g16931	achb2	0.174361	2.03801	11.6884	0.0480768	neuronal acetylcholine receptor subunit beta-2 flags: precursor
g31447	acinu	86.4927	265.794	3.07302	0.000172701	apoptotic chromatin condensation inducer in the nucleus short=acinus
g26852	acinu	46.9532	11.8612	0.252618	1.59035e-05	apoptotic chromatin condensation inducer in the nucleus short=acinus
g29269	ack1	58.6262	30.3583	0.517828	0.029312	activated cdc42 kinase 1 short=ack-1
g15914	ack1	187.843	74.2675	0.395371	0.00124292	activated cdc42 kinase 1 short=ack-1
g39676	ack1	17.8759	3.32572	0.186044	2.08242e-05	activated cdc42 kinase 1 short=ack-1
g20984	acl6a	11.4505	27.1369	2.36993	0.0332125	actin-like protein 6a
g44051	acl6b	19.8447	75.5591	3.80753	0.000877064	actin-like protein 6b
g16231	acm2	97.4914	23.894	0.245089	0.00607344	muscarinic acetylcholine receptor m2
g5929	acm3	16.7831	4.27489	0.254714	0.00272516	muscarinic acetylcholine receptor m3
g9256	acm4	19.4942	58.779	3.0152	0.00504064	muscarinic acetylcholine receptor m4
g12023	aco12	14.1719	39.8024	2.80854	0.0114963	acyl-coenzyme a thioesterase 12 short=acyl- thioesterase 12
g7190	acod	876.74	460.011	0.524683	0.0187196	acyl- desaturase
g5657	acod	8059.51	2923.41	0.362728	0.000371285	acyl- desaturase
g34864	acon	8.31842	39.2178	4.71457	2.32853e-05	aconitate mitochondrial short=aconitase
g43760	acon	13.0769	52.557	4.01906	7.90972e-05	aconitate mitochondrial short=aconitase
g30951	acon	27.547	104.503	3.79363	4.20925e-05	aconitate mitochondrial short=aconitase
g23101	acon	77.7986	193.544	2.48776	0.00294745	aconitate mitochondrial short=aconitase
g45401	acox1	6.01578	16.501	2.74295	0.0178903	peroxisomal acyl-coenzyme a oxidase 1 short=aox
g14520	acoxl	395.381	215.692	0.54553	0.0400591	acyl-coenzyme a oxidase-like protein short=acyl- oxidase-like protein
g8812	acpm	563.216	1025	1.8199	0.0439696	acyl carrier mitochondrial short=acp
g887	acrc	19.8146	6.1266	0.309196	0.00619346	acidic repeat-containing protein
g39066	acsl1	6.18795	39.4914	6.38199	0.0238941	long-chain-fatty-acid-- ligase 1
g12916	acsl1	47.9303	20.3796	0.425192	0.00624666	long-chain-fatty-acid-- ligase 1
g12915	acsl1	496.622	203.235	0.409235	0.00158066	long-chain-fatty-acid-- ligase 1
g3969	acsl3	244.843	109.949	0.449061	0.00666918	long-chain-fatty-acid-- ligase 3
g6419	acsl4	2250.7	425.575	0.189086	0.00188036	long-chain-fatty-acid-- ligase 4
g7748	acsl5	102.441	38.9628	0.380343	0.006008	long-chain-fatty-acid-- ligase 5
g902	acsm3	128.354	316.918	2.46909	0.00290108	acyl-coenzyme a synthetase mitochondrial
g37988	act2	153.013	3261.08	21.3124	1.1943e-19	actin-2
g1679	actc	0	2.10771	Inf	0.0170401	alpha cardiac
g2214	actc	126.108	746.018	5.91569	3.69302e-09	alpha cardiac muscle 1
g16674	actn	1406.32	2584.94	1.83808	0.0395456	alpha- sarcomeric
g6152	actn2	29.5839	64.2332	2.17122	0.0208885	alpha-actinin-2
g28265	actn3	1.13844	11.7802	10.3476	0.00584584	alpha-actinin-3
g8741	actn3	8.76834	44.034	5.02194	7.90176e-06	alpha-actinin-3
g6116	acts	100.585	222.273	2.2098	0.00897503	alpha skeletal muscle
g39249	actsa	0	2488.39	Inf	7.0162e-62	alpha skeletal muscle a
g16323	acv1b	612.806	324.663	0.529797	0.0249908	activin receptor type-1b
g11465	acv1b	206.772	71.7213	0.346862	0.00200352	activin receptor type-1b
g14909	acv1c	16.8803	2.57766	0.152702	0.0397181	activin receptor type-1c
g40457	acvr1	16.9953	36.1411	2.12654	0.0277456	activin receptor type-1
g14908	acvr1	573.289	306.938	0.535399	0.0282299	activin receptor type-1
g2864	ada10	1172.91	504.852	0.430427	0.00272255	disintegrin and metalloproteinase domain-containing protein 10 short=adam 10
g13001	ada10	343.523	139.411	0.405827	0.00214582	disintegrin and metalloproteinase domain-containing protein 10 short=adam 10
g21245	ada19	23.27	6.7888	0.291741	0.00136762	disintegrin and metalloproteinase domain-containing protein 19 short=adam 19
g22702	ada19	19.3711	4.05045	0.209098	0.000169286	disintegrin and metalloproteinase domain-containing protein 19 short=adam 19
g45144	ada19	4.0426	0.23476	0.0580715	0.0404328	disintegrin and metalloproteinase domain-containing protein 19 short=adam 19
g32758	ada19	7.77279	0.306953	0.0394907	0.0209596	disintegrin and metalloproteinase domain-containing protein 19 short=adam 19
g6721	adb4c	110.261	306.303	2.77798	0.00082326	beta-4c adrenergic receptor
g19223	adck1	1.3042	4.68442	3.59179	0.0395928	uncharacterized aarf domain-containing protein kinase 1 flags: precursor
g39185	adck3	6.19472	50.1261	8.09175	3.39737e-08	chaperone activity of bc1 complex- mitochondrial short=chaperone-abc1-like
g4900	adcy2	233.423	64.6	0.27675	0.0290325	adenylate cyclase type 2
g21921	adcy4	316.958	138.074	0.435622	0.0250866	adenylate cyclase type 4
g38320	adcy5	1.07628	5.18631	4.81873	0.0182505	adenylate cyclase type 5
g34591	adcy5	30.3728	59.3558	1.95424	0.0328782	adenylate cyclase type 5
g24310	adcy7	251.173	134.028	0.533609	0.0379363	adenylate cyclase type 7
g9401	adcy8	43.1757	14.3861	0.3332	0.000974808	adenylate cyclase type 8
g4735	adda	420.832	127.027	0.301848	0.00035907	alpha-adducin
g17012	addg	714.416	365.329	0.511367	0.0236311	gamma-adducin
g13547	addg	2033.82	612.964	0.301385	1.40844e-05	gamma-adducin
g25323	adhl	99.1341	347.567	3.50603	0.00125411	alcohol dehydrogenase class-3 chain l
g22156	adhx	78.4644	227.424	2.89844	0.0103035	alcohol dehydrogenase class-3
g39624	adk	32.9373	309.189	9.38721	6.57938e-05	adenosine kinase short=ak
g43300	adk	29.1418	236.906	8.12942	4.11046e-05	adenosine kinase short=ak
g16292	adk	243.63	1015.48	4.16811	0.00193236	adenosine kinase short=ak
g24822	adk	45.5699	165.618	3.63438	0.00929535	adenosine kinase short=ak
g30963	adk	44.3681	127.417	2.87182	0.00242844	adenosine kinase short=ak
g42992	adk	112.359	229.118	2.03917	0.0128869	adenosine kinase short=ak
g20071	adk	577.409	1097.93	1.90148	0.0222032	adenosine kinase short=ak
g17927	adk	96.046	23.2006	0.241557	0.00198094	adenosine kinase short=ak
g9954	adm1b	150.786	424.355	2.81428	0.000520001	proteasomal ubiquitin receptor adrm1-b
g14068	adml	132.234	57.4024	0.434096	0.0263505	adm contains:
g10425	adnp2	144.028	59.9017	0.415904	0.00306146	adnp homeobox protein 2
g18885	adpgk	132.375	236.766	1.78861	0.0474668	adp-dependent glucokinase short=adp-gk short=adpgk flags: precursor
g9291	adppt	68.991	33.4353	0.484633	0.0263685	l-aminoadipate-semialdehyde dehydrogenase-phosphopantetheinyl transferase
g40471	adt1	2.29407	15.6671	6.82939	0.00201578	adp atp translocase 1
g6355	adt2	12929.8	22566.1	1.74529	0.0492079	adp atp translocase 2
g12684	adt2	459.95	236.549	0.514293	0.0267368	adp atp translocase 2
g12115	adx	311.284	726.186	2.33287	0.010695	mitochondrial
g13929	af10	78.4456	41.9793	0.535139	0.0374197	protein af-10
g25068	af1l1	4.49202	32.9469	7.33453	4.41189e-07	actin filament-associated protein 1-like 1 short=afap1-like protein 1
g44912	af9	1.04885	5.93078	5.65458	0.0110239	protein af-9
g4948	aff2	9.43413	32.613	3.45691	0.00452952	af4 fmr2 family member 2
g40898	aff4	30.2066	57.9202	1.91747	0.0477184	af4 fmr2 family member 4
g38973	aff4	36.1895	18.9588	0.523876	0.0338427	af4 fmr2 family member 4
g33949	afg31	38.7266	85.9086	2.21834	0.0152472	afg3-like protein 1
g38755	afg32	9.74879	41.4179	4.24852	0.000891106	afg3-like protein 2
g21018	agap1	167.197	72.9812	0.436498	0.00484567	arf-gap with ank repeat and ph domain-containing protein 1 short=agap-1
g1268	agap3	181.609	329.594	1.81486	0.041065	arf-gap with ank repeat and ph domain-containing protein 3 short=agap-3
g30560	ago4	32.6391	12.8983	0.39518	0.0060689	protein argonaute-4 short=argonaute4 short=mago4
g19458	agr2	75.3963	6.157	0.0816618	0.0244319	anterior gradient protein 2 homolog short=zagr2 flags: precursor
g282	agr2	36.1699	0.302904	0.00837447	0.000265912	anterior gradient protein 2 homolog short=zagr2 flags: precursor
g18195	agrin	43.3965	14.6722	0.338097	0.0159409	agrin flags: precursor
g44454	agrin	6.52151	2.04048	0.312884	0.0319015	agrin
g6551	agt2	7.95922	3.23485	0.406428	0.0404769	alanine--glyoxylate aminotransferase mitochondrial short=agt 2
g34225	ahnk	40.5905	273.412	6.73585	1.75869e-09	neuroblast differentiation-associated protein ahnak
g38864	ahnk	105.496	675.838	6.40632	1.48327e-09	neuroblast differentiation-associated protein ahnak
g42763	ahnk	147.26	648.079	4.40092	1.00356e-06	neuroblast differentiation-associated protein ahnak
g37328	ahnk	121.723	481.131	3.95266	4.60976e-06	neuroblast differentiation-associated protein ahnak
g39497	ahnk	202.291	542.314	2.68087	0.000721779	neuroblast differentiation-associated protein ahnak
g43293	ahnk	372.578	931.692	2.50066	0.00150962	neuroblast differentiation-associated protein ahnak
g19288	ahnk	520.639	246.431	0.473324	0.0264102	neuroblast differentiation-associated protein ahnak
g9499	ahnk	25.572	6.45403	0.252387	0.000457507	neuroblast differentiation-associated protein ahnak
g20407	aida	66.5361	28.52	0.428639	0.00602139	axin dorsalization-associated protein
g13358	aifm3	3.74528	25.5132	6.81208	0.0425484	apoptosis-inducing factor 3
g11610	aim1	139.643	282.039	2.01971	0.0199922	absent in melanoma 1 protein
g22028	aim1	640.917	295.901	0.461683	0.00532704	absent in melanoma 1 protein
g36831	aimp1	10.9368	93.9246	8.58797	4.50836e-10	aminoacyl trna synthase complex-interacting multifunctional protein 1
g5149	aimp1	10.5019	47.1053	4.48543	2.42398e-05	aminoacyl trna synthase complex-interacting multifunctional protein 1
g22120	aipl1	2.51282	0.391977	0.15599	0.0447337	aryl-hydrocarbon-interacting 1
g13709	ajl1	3.78131	0.123497	0.0326598	0.000362092	galactose-binding lectin l-1 short=galectin
g31613	ajl2	2.54955	0.197284	0.0773798	0.0141356	lactose-binding lectin l-2
g36553	ajl2	1.65233	0	0	0.0287682	lactose-binding lectin l-2
g36109	ajl2	1.23407	0	0	0.042915	lactose-binding lectin l-2
g40301	ak1bf	48.1446	89.3059	1.85495	0.0393014	aldo-keto reductase family 1 member b15
g25906	aka12	1149.46	469.89	0.40879	0.00103359	a-kinase anchor protein 12 short=akap-12
g44202	akap1	3.76353	0.854186	0.226964	0.0373173	a-kinase anchor protein mitochondrial
g21977	akap6	11.3365	3.07421	0.271179	0.00565656	a-kinase anchor protein 6 short=akap-6
g23631	akap9	97.8533	50.3186	0.514225	0.024817	a-kinase anchor protein 9 short=akap-9
g4373	akp13	9.62299	24.6779	2.56448	0.0133424	a-kinase anchor protein 13 short=akap-13
g35069	akp13	16.0141	34.3861	2.14724	0.039743	a-kinase anchor protein 13 short=akap-13
g41472	akp8l	21.5632	56.0998	2.60164	0.00439955	a-kinase anchor protein 8-like short=akap8-like protein
g43797	akt2	11.2439	24.1483	2.14767	0.03652	rac-beta serine threonine-protein kinase
g10205	akt3	163.747	39.2966	0.239983	2.49682e-06	rac-gamma serine threonine-protein kinase
g25916	al3a2	149.149	290.982	1.95095	0.0336841	fatty aldehyde dehydrogenase
g31978	aldh2	29.1753	108.93	3.73363	3.40934e-05	aldehyde mitochondrial
g34489	aldh2	40.8786	99.6924	2.43874	0.00388182	aldehyde mitochondrial
g30323	aldh2	214.377	459.653	2.14414	0.0103723	aldehyde mitochondrial
g21958	aldoa	147981	329190	2.22454	0.00503559	fructose-bisphosphate aldolase a
g19292	aldob	30.9082	368.333	11.917	6.77644e-05	fructose-bisphosphate aldolase b
g34071	aldob	54.1884	234.188	4.32173	0.0114855	fructose-bisphosphate aldolase b
g32517	aldob	295.768	1120.36	3.78796	0.0199535	fructose-bisphosphate aldolase b
g3895	aldr	25.096	58.8526	2.3451	0.00986806	aldose reductase short=ar
g22222	alg12	41.5006	22.655	0.545895	0.039894	dolichyl-p-man:man c -pp-dolichyl-alpha- -mannosyltransferase
g8518	alg9	130.914	74.7158	0.570725	0.0462814	alpha- -mannosyltransferase alg9
g38897	alkb1	18.3103	49.8453	2.72226	0.00142722	alkylated dna repair protein alkb homolog 1
g28064	alo17	24.5898	5.5838	0.227078	0.0014397	protein alo17
g27783	alo17	88.5704	9.94626	0.112298	0.001244	protein alo17
g26247	alo17	77.5383	7.80578	0.10067	1.71538e-05	protein alo17
g22859	alpk1	236.247	105.89	0.448219	0.0395707	alpha-protein kinase 1
g32434	als2	13.651	33.7014	2.46878	0.00988415	alsin
g5238	alx1	244.321	58.9102	0.241118	0.0468968	alx homeobox protein 1
g27944	alx4	20.4581	3.69529	0.180627	0.0162251	homeobox protein aristaless-like 4
g20635	alx4	21.3442	2.24337	0.105104	0.0128484	homeobox protein aristaless-like 4
g6107	alx4	48.0778	4.97239	0.103424	0.000102758	homeobox protein aristaless-like 4
g29898	amacr	3.52663	18.9923	5.3854	0.000107467	alpha-methylacyl- racemase
g27465	amacr	30.8867	59.5269	1.92727	0.0412658	alpha-methylacyl- racemase
g28440	amd	291.667	105.11	0.360377	0.000209812	peptidyl-glycine alpha-amidating monooxygenase short=pam includes:
g37625	amda	28.5542	14.8929	0.521566	0.0402358	peptidyl-glycine alpha-amidating monooxygenase a short=pam-a
g44343	amdb	17.3553	3.90683	0.225109	0.00127744	peptidyl-glycine alpha-amidating monooxygenase b short=pam-b
g1223	amer1	167.819	72.0316	0.429222	0.00284033	amme syndrome candidate gene 1 protein homolog
g41167	ami	21.8956	151.314	6.91067	0.000590453	serine protease ami flags: precursor
g13745	amn1	11.5939	4.42053	0.381279	0.0253866	protein amn1 homolog
g20914	amot	658.85	301.964	0.45832	0.00901893	angiomotin
g28690	ampb	61.2214	32.2443	0.526684	0.0295153	aminopeptidase b short=ap-b
g42033	ampd2	5.10005	13.794	2.70468	0.0207388	amp deaminase 2
g27575	ampd2	6.49694	16.385	2.52196	0.0236561	amp deaminase 2
g25909	ampe	48.0244	17.6741	0.368024	0.0444738	glutamyl aminopeptidase short=eap
g41373	ampl	35.1746	70.4772	2.00364	0.0317197	cytosol aminopeptidase
g15894	ampm2	364.642	1036.66	2.84295	0.000392554	methionine aminopeptidase 2 short=map 2 short= 2
g15468	ampn	98.241	41.4622	0.422045	0.0034784	aminopeptidase n short=ap-n short=mapn
g16700	ampn	10.2679	3.37105	0.328311	0.0145822	aminopeptidase n
g18889	ampn	49.969	13.4818	0.269804	0.000636564	aminopeptidase n
g1469	amra1	197.767	100.003	0.505659	0.0195387	activating molecule in becn1-regulated autophagy protein 1
g472	amyp	0.884222	33.358	37.7259	0.0146463	pancreatic alpha-amylase short=pa
g1128	amyp	24.9172	75.2144	3.01857	0.000280177	pancreatic alpha-amylase short=pa
g36909	an32b	12.3197	67.1362	5.44948	1.5872e-06	acidic leucine-rich nuclear phosphoprotein 32 family member b
g20846	an32b	123.426	398.015	3.22472	0.000138817	acidic leucine-rich nuclear phosphoprotein 32 family member b
g193	an33b	16.4302	5.22007	0.317712	0.00366107	ankyrin repeat domain-containing protein 33b
g8594	anag	804.123	341.697	0.424931	0.0025828	alpha-n-acetylglucosaminidase
g1927	andr	771.88	209.688	0.271659	3.77719e-05	androgen receptor
g20409	anfy1	1203.7	548.408	0.455602	0.00413208	ankyrin repeat and fyve domain-containing protein 1
g33011	ange2	4.24229	16.4028	3.86651	0.00119198	protein angel homolog 2
g40682	angl1	48.4363	22.6918	0.468488	0.0154731	angiopoietin-related protein 1
g28544	angl2	15.9013	7.32901	0.460905	0.0481413	angiopoietin-related protein 2
g9556	angl2	84.6913	23.2124	0.274083	0.0133086	angiopoietin-related protein 2
g21130	angl2	470.347	109.074	0.231902	1.21933e-06	angiopoietin-related protein 2
g21430	angl4	529.414	1386.02	2.61802	0.000774882	angiopoietin-related protein 4
g12798	angp2	11.6611	0.517105	0.0443444	0.00668427	angiopoietin-2 short=ang-2 flags: precursor
g14416	ank1	84.4885	29.4915	0.349059	0.00610022	ankyrin-1 short=ank-1
g1018	ank3	401.847	208.162	0.518014	0.0223937	ankyrin-3 short=ank-3
g23614	ank3	24.4567	11.8014	0.482542	0.0349246	ankyrin-3 short=ank-3
g32029	ank3	15.3188	6.72979	0.439314	0.0212345	ankyrin-3 short=ank-3
g19526	ank3	191.742	55.7779	0.290901	0.000172207	ankyrin-3 short=ank-3
g27393	ankh1	8.92183	21.6658	2.42841	0.0149314	ankyrin repeat and kh domain-containing protein 1
g3953	ankhb	878.738	3577.37	4.07103	0.00106658	progressive ankylosis protein homolog b short=ank-b
g18658	ankhb	94.8271	45.2853	0.477556	0.0322942	progressive ankylosis protein homolog b short=ank-b
g1858	ankl1	32.0591	9.29349	0.289886	0.00366505	ankyrin repeat and lem domain-containing protein 1
g24829	ankr9	3.11049	18.6417	5.99317	0.000155783	ankyrin repeat domain-containing protein 9
g19657	ankr9	169.503	13.2576	0.0782142	0.000252915	ankyrin repeat domain-containing protein 9
g38834	anm1	52.1226	123.859	2.3763	0.0060052	protein arginine n-methyltransferase 1
g41202	anm10	3.95843	9.73091	2.45828	0.0440115	protein arginine n-methyltransferase 10
g358	ano2	63.2036	19.9302	0.315334	0.000627031	anoctamin-2
g33018	ano5	22.512	46.7671	2.07743	0.0288107	anoctamin-5
g4976	ano5	448.001	228.067	0.509076	0.0241897	anoctamin-5
g20596	ano6	85.9303	181.669	2.11415	0.0139851	anoctamin-6
g23932	ano7	4.92306	1.36245	0.276748	0.0370259	anoctamin-7
g2308	anprb	271.769	94.6075	0.348117	0.000158866	atrial natriuretic peptide receptor 2
g6491	anprc	8.07236	27.2068	3.37036	0.0357876	atrial natriuretic peptide receptor 3
g5561	anr10	506.334	1205.95	2.38173	0.002335	ankyrin repeat domain-containing protein 10
g16438	anr11	430.54	237.12	0.55075	0.0290556	ankyrin repeat domain-containing protein 11
g12120	anr22	5.98614	0.766423	0.128033	0.00357737	ankyrin repeat domain-containing protein 22
g21343	anr27	288.908	113.189	0.391783	0.00100733	ankyrin repeat domain-containing protein 27
g38624	anr27	16.3177	5.55941	0.340698	0.0037991	ankyrin repeat domain-containing protein 27
g25082	anr44	30.4976	6.67514	0.218874	0.000289567	serine threonine-protein phosphatase 6 regulatory ankyrin repeat subunit b short=pp6-ars-b short=serine threonine-protein phosphatase 6 regulatory subunit ars-b
g6361	anr57	72.543	144.352	1.98987	0.0254963	ankyrin repeat domain-containing protein 57
g20068	ans1b	10.7125	3.90314	0.364354	0.0404876	ankyrin repeat and sterile alpha motif domain-containing protein 1b
g19361	ans1b	393.418	142.484	0.362169	0.000845555	ankyrin repeat and sterile alpha motif domain-containing protein 1b
g17792	antr1	54.7102	18.4337	0.336933	0.000934095	anthrax toxin receptor 1
g31296	antr1	5.55202	1.17378	0.211415	0.0105368	anthrax toxin receptor 1
g5582	antr2	122.251	66.9486	0.547631	0.0364299	anthrax toxin receptor 2
g5828	anx13	687.166	249.776	0.363488	0.00090838	annexin a13
g2355	anx2a	173.646	405.124	2.33304	0.00533103	annexin a2-a
g16616	anxa2	5201.06	10330.4	1.98622	0.0116636	annexin a2
g40013	ap1b1	7.83481	21.5986	2.75675	0.00826703	ap-1 complex subunit beta-1
g45468	ap1g1	11.7003	29.5752	2.52773	0.0164405	ap-1 complex subunit gamma-1
g16208	ap1m1	124.297	312.129	2.51115	0.00224809	ap-1 complex subunit mu-1
g37277	ap1s2	7.41245	17.1646	2.31565	0.03928	ap-1 complex subunit sigma-2
g1434	ap2a	9.93302	4.23906	0.426764	0.034743	transcription factor ap-2-alpha short=ap2-alpha
g34471	ap2ma	27.6073	85.1241	3.08339	0.000730552	ap-2 complex subunit mu-1-a
g44767	ap2ma	37.3335	100.338	2.6876	0.00179268	ap-2 complex subunit mu-1-a
g6196	ap3b2	11.0271	4.16029	0.377278	0.0452483	ap-3 complex subunit beta-2
g6197	ap3b2	163.423	61.608	0.376985	0.00166378	ap-3 complex subunit beta-2
g45028	ap4a	4.8579	12.8848	2.65234	0.0209647	bis(5 -nucleosyl)-tetraphosphatase
g12331	ap4s1	11.6112	61.0797	5.26042	3.02519e-06	ap-4 complex subunit sigma-1
g18068	apaf	83.8417	26.0551	0.310765	0.0207646	apoptotic protease-activating factor 1 short=apaf-1
g19362	apaf	367.185	100.69	0.27422	0.00120071	apoptotic protease-activating factor 1 short=apaf-1
g29423	apaf	58.7224	15.5954	0.265578	0.0250489	apoptotic protease-activating factor 1 short=apaf-1
g40257	apba1	1.94579	6.94833	3.57096	0.0269458	amyloid beta a4 precursor protein-binding family a member 1
g1892	apba1	464.798	921.503	1.98259	0.0163178	amyloid beta a4 precursor protein-binding family a member 1
g2852	apba2	8.70668	2.27529	0.261327	0.00902591	amyloid beta a4 precursor protein-binding family a member 2
g20375	apbb2	54.5086	112.106	2.05667	0.0188276	amyloid beta a4 precursor protein-binding family b member 2
g19585	apbb2	169.035	82.1998	0.486289	0.0111148	amyloid beta a4 precursor protein-binding family b member 2
g30960	apbp2	19.8558	6.05057	0.304725	0.00867991	amyloid protein-binding protein 2
g31273	apbp2	109.384	20.1251	0.183985	0.00214708	amyloid protein-binding protein 2
g5184	apc	1544.74	612.131	0.396267	0.00149248	adenomatous polyposis coli protein short=protein apc
g45611	apc1	1.31572	5.68383	4.31994	0.017842	anaphase-promoting complex subunit 1 short=apc1
g5316	apc2	18.988	4.80755	0.253189	0.00040393	adenomatous polyposis coli protein 2
g16120	aplf	41.6613	18.8135	0.451583	0.0150245	aprataxin and pnk-like factor
g32381	aplp2	10.3118	22.4313	2.17531	0.0301675	amyloid-like protein 2 short=aplp-2
g40901	aplp2	82.3259	160.147	1.94528	0.0369194	amyloid-like protein 2 short=aplp-2
g19285	aplp2	3384.38	1686.25	0.498245	0.0132021	amyloid-like protein 2 short=aplp-2
g25546	aplp2	308.258	100.253	0.325223	0.014064	amyloid-like protein 2 short=aplp-2
g44296	apmap	11.7703	46.5382	3.95387	0.00859323	adipocyte plasma membrane-associated protein
g6315	apob	6.81397	17.4465	2.56041	0.0353933	apolipoprotein b-100 short=apo b-100 contains:
g15955	apoc1	1319.51	303.074	0.229687	0.00672533	apolipoprotein c-i short=apo-cib short= -ib
g41003	apoeb	33.3446	475.322	14.2548	2.65098e-09	apolipoprotein eb short=apo-eb flags: precursor
g15956	apoeb	9249.3	3711.91	0.401318	0.00556399	apolipoprotein eb short=apo-eb flags: precursor
g36100	apol6	15.2467	38.7062	2.53866	0.00501261	apolipoprotein l6
g8981	apool	20.357	70.5599	3.46612	0.0407568	apolipoprotein o-like
g214	aqp1	4804.14	11466.5	2.38679	0.00221874	aquaporin-1 short=aqp-1
g20106	aqr	26.1113	10.8301	0.414766	0.00869411	intron-binding protein aquarius
g786	ar13b	104.961	51.316	0.488906	0.0205338	adp-ribosylation factor-like protein 13b
g31793	ar6p1	81.4136	149.713	1.83892	0.0359011	adp-ribosylation factor-like protein 6-interacting protein 1 short=arl-6-interacting protein 1 short=aip-1
g11259	arap2	7.88049	1.12308	0.142514	0.0119648	arf-gap with rho-gap ank repeat and ph domain-containing protein 2
g151	arc1a	1760.48	3433.52	1.95033	0.0233494	actin-related protein 2 3 complex subunit 1a
g17249	arc1b	950.227	3164.01	3.32974	2.72995e-05	actin-related protein 2 3 complex subunit 1b
g40482	arfp2	14.0309	30.2393	2.1552	0.0191683	arfaptin-2
g34179	arfp2	30.4799	65.2376	2.14035	0.0134253	arfaptin-2
g15646	arg33	24.7897	3.94561	0.159163	0.0117737	rho guanine nucleotide exchange factor 33
g16064	arh37	95.194	28.2951	0.297236	0.0148028	rho guanine nucleotide exchange factor 37
g26596	arhg1	75.7838	37.5485	0.495468	0.0255092	rho guanine nucleotide exchange factor 1
g5964	arhg6	658.358	215.158	0.326809	0.000173805	rho guanine nucleotide exchange factor 6
g32826	arhg8	32.1107	145.385	4.52763	0.000152295	neuroepithelial cell-transforming gene 1 protein
g39991	arhg8	65.1308	173.176	2.65889	0.00632293	neuroepithelial cell-transforming gene 1 protein
g43152	arhg9	1.67076	20.2053	12.0935	7.64303e-07	rho guanine nucleotide exchange factor 9
g13378	arhgb	44.1442	105.824	2.39723	0.00412643	rho guanine nucleotide exchange factor 11
g32194	arhgc	10.6715	25.4413	2.38404	0.0178542	rho guanine nucleotide exchange factor 12
g4850	arhgc	225.103	117.146	0.520411	0.0233625	rho guanine nucleotide exchange factor 12
g22404	arhgi	614.563	322.277	0.524401	0.0356623	rho guanine nucleotide exchange factor 18
g6225	arhgj	6.10783	1.07748	0.176409	0.0100545	rho guanine nucleotide exchange factor 19
g5122	arhgq	207.387	87.0333	0.419666	0.00350182	rho guanine nucleotide exchange factor 26
g26991	arhl2	18.7159	7.45059	0.398089	0.0128247	poly(adp-ribose) glycohydrolase arh3
g24480	ari1	398.868	194.424	0.487439	0.00989433	protein ariadne-1 homolog short=ari-1
g35150	ari1a	39.3695	78.1465	1.98495	0.0315528	at-rich interactive domain-containing protein 1a short=arid domain-containing protein 1a
g21475	ari1a	149.167	78.3488	0.525241	0.038299	at-rich interactive domain-containing protein 1a short=arid domain-containing protein 1a
g18119	ari1b	51.4932	26.2462	0.509702	0.0460589	at-rich interactive domain-containing protein 1b short=arid domain-containing protein 1b
g37787	ari1b	7.89451	2.53468	0.321069	0.0213445	at-rich interactive domain-containing protein 1b short=arid domain-containing protein 1b
g12552	ari3a	1.43677	10.8559	7.55576	0.000131805	at-rich interactive domain-containing protein 3a short=arid domain-containing protein 3a
g35926	ari4a	18.1826	37.1104	2.04098	0.0308675	at-rich interactive domain-containing protein 4a short=arid domain-containing protein 4a
g24458	ari4b	181.936	93.5513	0.514199	0.0226319	at-rich interactive domain-containing protein 4b short=arid domain-containing protein 4b
g9441	ari5a	65.2287	17.0642	0.261605	0.0403585	at-rich interactive domain-containing protein 5a short=arid domain-containing protein 5a
g6808	ari5b	4.69239	0.172383	0.0367368	0.0272302	at-rich interactive domain-containing protein 5b short=arid domain-containing protein 5b
g23788	arid2	13.3371	34.9852	2.62315	0.00494493	at-rich interactive domain-containing protein 2 short=arid domain-containing protein 2
g7395	arl3	112.226	59.239	0.527856	0.0422442	adp-ribosylation factor-like protein 3
g31524	arl3	66.0913	23.1586	0.350404	0.001196	adp-ribosylation factor-like protein 3
g31274	arl5a	36.9116	73.3804	1.988	0.0392936	adp-ribosylation factor-like protein 5a
g35111	arl5b	9.28963	37.0903	3.99266	0.000194116	adp-ribosylation factor-like protein 5b
g6030	arl9	73.1144	22.2617	0.304477	0.000233532	adp-ribosylation factor-like protein 9
g17596	armc4	2.77424	0.466632	0.168202	0.0363035	armadillo repeat-containing protein 4
g29544	arnt	30.5718	61.4513	2.01007	0.0255186	aryl hydrocarbon receptor nuclear translocator short=rtarnt
g35857	arnt2	6.82112	20	2.93206	0.00662639	aryl hydrocarbon receptor nuclear translocator 2 short=arnt protein 2
g37186	arp10	8.68973	33.0259	3.80057	0.000185354	actin-related protein 10
g6568	arpc5	1167.16	453.477	0.38853	0.00533913	actin-related protein 2 3 complex subunit 5
g9212	arrb1	125.037	260.221	2.08116	0.0188522	beta-arrestin-1
g17963	arrb1	27.0911	7.56279	0.279162	0.00034036	beta-arrestin-1
g29491	arrd1	12.3935	36.6918	2.96057	0.00170311	arrestin domain-containing protein 1
g1916	arrd2	1845.9	3408.49	1.84652	0.0276464	arrestin domain-containing protein 2
g15379	arrd3	1927.73	997.221	0.517303	0.0288271	arrestin domain-containing protein 3
g11441	arrd3	566.542	194.107	0.342617	0.000431376	arrestin domain-containing protein 3
g36571	arsk	3.10733	41.9989	13.516	0.000173001	arylsulfatase k short=ask flags: precursor
g19981	arsk	112.862	351.048	3.11042	0.0222889	arylsulfatase k short=ask flags: precursor
g13699	artn	3.29414	8.87443	2.69401	0.0414654	artemin
g18488	arvc	482.188	176.051	0.365109	0.00137939	armadillo repeat protein deleted in velo-cardio-facial syndrome
g13116	as1ba	185.587	374.855	2.01984	0.0151035	histone chaperone asf1b-a
g16619	as3mt	168.844	378.387	2.24104	0.00672539	arsenite methyltransferase
g1321	asah2	352.75	103.801	0.294263	3.01354e-05	neutral ceramidase short=n-cdase short=ncdase
g22507	asap1	211.076	114.298	0.5415	0.0293553	arf-gap with sh3 ank repeat and ph domain-containing protein 1
g8797	asap1	68.3225	32.3668	0.473735	0.0101405	arf-gap with sh3 ank repeat and ph domain-containing protein 1
g27845	asap1	19.8595	7.9089	0.398242	0.00979401	arf-gap with sh3 ank repeat and ph domain-containing protein 1
g4112	asb1	114.698	49.2304	0.429219	0.00482347	ankyrin repeat and socs box protein 1 short=asb-1
g8831	asb15	2.31875	0	0	0.00337753	ankyrin repeat and socs box protein 15 short=asb-15
g3850	asb5	48.9331	16.0613	0.328229	0.0257092	ankyrin repeat and socs box protein 5 short=asb-5
g976	asb7	263.19	150.506	0.571852	0.0491591	ankyrin repeat and socs box protein 7 short=asb-7
g38359	asb8	10.4566	38.073	3.64104	0.000396174	ankyrin repeat and socs box protein 8 short=asb-8
g25527	ascc2	17.0719	6.6464	0.389318	0.0137158	activating signal cointegrator 1 complex subunit 2
g9942	asf1a	72.3781	208.47	2.88029	0.00416208	histone chaperone asf1a
g3493	asl1b	28.6795	8.79013	0.306495	0.00853658	achaete-scute homolog 1b short=zash-1b
g28938	asm3b	7.9599	21.8568	2.74587	0.00850165	acid sphingomyelinase-like phosphodiesterase 3b short=asm-like phosphodiesterase 3b flags: precursor
g40037	asna	7.13365	34.5764	4.84694	2.19216e-05	atpase asna1
g37679	aspp2	11.9368	40.3688	3.38187	0.000829341	apoptosis-stimulating of p53 protein 2
g6071	at11a	62.0514	12.5258	0.201861	4.3142e-07	probable phospholipid-transporting atpase ih
g7606	at11c	108.755	42.4274	0.39012	0.00237693	probable phospholipid-transporting atpase 11c
g20731	at133	190.568	93.8127	0.49228	0.0121877	probable cation-transporting atpase 13a3
g3918	at133	121.409	55.0998	0.453838	0.0167977	probable cation-transporting atpase 13a3
g34256	at1a1	0	2.16013	Inf	0.0128066	sodium potassium-transporting atpase subunit alpha-1 short=na(+) k(+) atpase alpha-1 subunit
g43721	at1a1	137.444	1997.06	14.53	4.45413e-16	sodium potassium-transporting atpase subunit alpha-1 short=na(+) k(+) atpase alpha-1 subunit
g30151	at1a1	89.9523	378.66	4.20957	3.0401e-06	sodium potassium-transporting atpase subunit alpha-1 short=na(+) k(+) atpase alpha-1 subunit
g17728	at1a1	385.043	1100.86	2.85905	0.00028149	sodium potassium-transporting atpase subunit alpha-1 short=na(+) k(+) atpase alpha-1 subunit
g20531	at1a1	5321.06	13017	2.44632	0.00280133	sodium potassium-transporting atpase subunit alpha-1 short=na(+) k(+) atpase alpha-1 subunit
g17727	at1a1	5877.5	13085	2.22628	0.00674634	sodium potassium-transporting atpase subunit alpha-1 short=na(+) k(+) atpase alpha-1 subunit
g42071	at1a2	0	18.1396	Inf	7.57031e-12	sodium potassium-transporting atpase subunit alpha-2 short=na(+) k(+) atpase alpha-2 subunit
g13768	at1a3	68.5375	201.915	2.94605	0.000593527	sodium potassium-transporting atpase subunit alpha-3 short=na(+) k(+) atpase alpha-3 subunit
g22785	at1a3	319.51	126.451	0.395765	0.0491531	sodium potassium-transporting atpase subunit alpha-3 short=na(+) k(+) atpase alpha-3 subunit
g21446	at1a3	21.0527	4.82698	0.229281	0.00303331	sodium potassium-transporting atpase subunit alpha-3 short=na(+) k(+) atpase alpha-3 subunit
g3341	at1b3	99.7799	55.4795	0.556018	0.0435371	sodium potassium-transporting atpase subunit beta-3
g6367	at1b4	14.9913	38.5448	2.57114	0.00801362	protein atp1b4
g12591	at2a1	70.6895	37.8395	0.535292	0.0256179	sarcoplasmic endoplasmic reticulum calcium atpase 1 short=serca1 short=sr ca(2+)-atpase 1
g40132	at2a2	19.0102	54.9054	2.8882	0.00208594	sarcoplasmic endoplasmic reticulum calcium atpase 2 short=serca2 short=sr ca(2+)-atpase 2
g9585	at2a2	1235.94	548.005	0.443392	0.00358125	sarcoplasmic endoplasmic reticulum calcium atpase 2 short=serca2 short=sr ca(2+)-atpase 2
g32849	at2b1	80.9367	166.902	2.06213	0.0210337	plasma membrane calcium-transporting atpase 1 short=pmca1
g44922	at2b2	6.92915	81.3392	11.7387	1.12398e-11	plasma membrane calcium-transporting atpase 2 short=pmca2
g39363	at2b2	1.94914	14.8371	7.61213	5.3145e-05	plasma membrane calcium-transporting atpase 2 short=pmca2
g44553	at2b3	21.2486	130.816	6.15648	6.44006e-08	plasma membrane calcium-transporting atpase 3 short=pmca3
g35272	at2b3	11.1021	37.5691	3.38397	0.000629989	plasma membrane calcium-transporting atpase 3 short=pmca3
g30286	at2b4	2.20197	6.99415	3.17632	0.0313421	plasma membrane calcium-transporting atpase 4 short=pmca4
g45382	at5f1	16.8186	67.3394	4.00386	2.80829e-05	atp synthase subunit mitochondrial short=atpase subunit b flags: precursor
g42762	at5f1	40.2401	102.55	2.54844	0.00200645	atp synthase subunit mitochondrial short=atpase subunit b flags: precursor
g44169	at5f1	82.3635	179.388	2.178	0.00723886	atp synthase subunit mitochondrial short=atpase subunit b flags: precursor
g10662	at5f1	661.595	1252.52	1.89319	0.0242698	atp synthase subunit mitochondrial short=atpase subunit b flags: precursor
g3847	at8a1	39.4765	11.0816	0.280713	0.00961818	probable phospholipid-transporting atpase ia
g10456	at8a1	118.396	23.2109	0.196044	0.00278031	probable phospholipid-transporting atpase ia
g15827	at8b2	9.57755	1.74138	0.181819	0.00124776	probable phospholipid-transporting atpase id
g3932	atad2	68.578	20.0368	0.292176	0.000120772	atpase family aaa domain-containing protein 2
g1325	atd1b	872.078	442.371	0.507261	0.0126066	atpase family aaa domain-containing protein 1-b
g40864	ate1	0.35982	3.3967	9.43999	0.0124084	arginyl-trna--protein transferase 1 short=arginyltransferase 1 short=r-transferase 1
g37540	ate1	3.28827	10.3384	3.14404	0.0152232	arginyl-trna--protein transferase 1 short=arginyltransferase 1 short=r-transferase 1
g26446	ate1	1.78363	0	0	0.010066	arginyl-trna--protein transferase 1 short=arginyltransferase 1 short=r-transferase 1
g37756	atf1	34.9643	115.251	3.29624	0.000212008	cyclic amp-dependent transcription factor atf-1 short=camp-dependent transcription factor atf-1
g43781	atf4	599.435	1634.13	2.72612	0.000582766	cyclic amp-dependent transcription factor atf-4 short=camp-dependent transcription factor atf-4
g4336	atg16	583.636	332.605	0.569884	0.0472929	autophagy-related protein 16
g8402	atg2a	114.61	236.239	2.06125	0.0199127	autophagy-related protein 2 homolog a
g19563	atg3	198.182	105.181	0.530731	0.0235829	ubiquitin-like-conjugating enzyme atg3
g23703	atg4d	895.364	387.523	0.43281	0.00208103	cysteine protease atg4d
g2629	atg9a	112.217	351.868	3.13561	0.00527426	autophagy-related protein 9a
g549	atl3	480.57	190.277	0.39594	0.00397815	adamts-like protein 3 short=adamtsl-3
g12723	atmin	280.562	156.599	0.558161	0.0315625	atm interactor
g26294	atp4a	4.92517	1.35899	0.275927	0.039433	potassium-transporting atpase alpha chain 1
g44089	atp7b	85.5238	226.489	2.64825	0.00627972	copper-transporting atpase 2
g2902	atpa	1454.47	3002.34	2.06422	0.0105436	atp synthase subunit mitochondrial flags: precursor
g32156	atpd	39.73	127.693	3.21401	0.000222428	atp synthase subunit mitochondrial
g43174	atpd	22.0974	60.1115	2.72029	0.00271201	atp synthase subunit mitochondrial
g30835	atpd	186.105	357.399	1.92041	0.0215373	atp synthase subunit mitochondrial
g14237	atpg	58.3034	123.566	2.11936	0.0388787	atp synthase subunit mitochondrial
g139	atpk	96.9512	354.831	3.65989	1.37579e-05	atp synthase subunit mitochondrial
g26453	atrn1	3.28754	11.9719	3.6416	0.00460438	attractin-like protein 1 flags: precursor
g15307	atrn1	5.27569	16.0203	3.03662	0.00739104	attractin-like protein 1 flags: precursor
g24821	atrn1	7.16687	16.6427	2.32217	0.0324088	attractin-like protein 1 flags: precursor
g18728	atrn1	19.2478	42.7098	2.21895	0.0145944	attractin-like protein 1 flags: precursor
g6525	atrx	1470.73	715.113	0.486231	0.00624591	transcriptional regulator atrx
g4477	atrx	818.577	343.713	0.419891	0.00150916	transcriptional regulator atrx
g973	ats17	42.8696	14.475	0.337651	0.000735748	a disintegrin and metalloproteinase with thrombospondin motifs 17 short=adam-ts 17 short=adam-ts17 short=adamts-17 flags: precursor
g17349	ats6	16.8129	5.05476	0.300649	0.00564321	a disintegrin and metalloproteinase with thrombospondin motifs 6 short=adam-ts 6 short=adam-ts6 short=adamts-6 flags: precursor
g4417	atx7	254.629	142.395	0.559224	0.0386382	ataxin-7
g10640	augna	48.2261	6.7398	0.139754	0.00878166	augurin-a flags: precursor
g21854	auts2	38.2265	15.283	0.399802	0.0100603	autism susceptibility gene 2 protein
g5534	auxi	7.424	2.47042	0.332761	0.021017	tyrosine-protein phosphatase auxilin
g3841	auxi	99.494	14.2112	0.142835	0.000137579	tyrosine-protein phosphatase auxilin
g39191	avl9	7.3981	28.2907	3.82404	0.0104564	late secretory pathway protein avl9 homolog
g19580	avl9	7.93984	22.0546	2.77771	0.0469884	late secretory pathway protein avl9 homolog
g3182	avpi1	5955.32	12470.6	2.09403	0.00813866	arginine vasopressin-induced protein 1 short=avp-induced protein 1
g32515	avr2a	5.03816	15.7719	3.13048	0.00500172	activin receptor type-2a
g9142	avr2a	132.18	61.9108	0.468384	0.0127486	activin receptor type-2a
g27065	avt	25.7815	4.24468	0.16464	0.00567859	-vasotocin receptor short=avt
g22762	azi1	65.2865	32.0858	0.491461	0.032624	5-azacytidine-induced protein 1
g13396	azi2	664.274	268.06	0.403538	0.00114044	5-azacytidine-induced protein 2
g35949	azin1	22.424	56.0384	2.49904	0.00525019	antizyme inhibitor 1 short=azi
g10470	azin1	373.27	835.757	2.23902	0.0113284	antizyme inhibitor 1 short=azi
g9424	b2l12	122.429	233.95	1.9109	0.0228049	bcl-2-like protein 12 short=bcl2-l-12
g15967	b2mg	24621.5	13488.8	0.547846	0.0425469	beta-2-microglobulin flags: precursor
g36437	b3a2	17.6182	58.3919	3.3143	0.0476071	anion exchange protein 2 short=ae 2 short=anion exchanger 2
g40900	b3g5a	1.06833	7.03428	6.58434	0.00281001	udp- c:betagal beta- -n-acetylglucosaminyltransferase 5a short=b -5a short=beta- -gn-t5a short=beta- -n-acetylglucosaminyltransferase 5a short=beta3gn-t5a
g25250	b3ga1	3.33034	0.62682	0.188215	0.0362729	galactosylgalactosylxylosylprotein 3-beta-glucuronosyltransferase 1
g29281	b3ga1	2.45271	0.248564	0.101343	0.0282311	galactosylgalactosylxylosylprotein 3-beta-glucuronosyltransferase 1
g5597	b3gn2	775.418	204.737	0.264035	0.0232729	udp- c:betagal beta- -n-acetylglucosaminyltransferase 2 short=b -2 short=beta- -gn-t2 short=beta- -n-acetylglucosaminyltransferase 2 short=beta3gn-t2
g42744	b3gt4	1.76184	9.78474	5.55369	0.00358375	beta- -galactosyltransferase 4 short=beta- - ase 4 short=beta3gal-t4 short=beta3 4 short=b3gal-t4
g40099	b3gt6	9.63791	23.2802	2.41548	0.0171764	beta- -galactosyltransferase 6 short=beta- - ase 6 short=beta3gal-t6 short=beta3 6
g3485	b4gn4	4.03995	0.365573	0.0904894	0.0173649	n-acetyl-beta-glucosaminyl-glycoprotein 4-beta-n-acetylgalactosaminyltransferase 1 short=n c-t1
g39155	b4gt3	9.46665	38.2869	4.04439	0.00340282	beta- -galactosyltransferase 3 short=beta- - ase 3 short=beta4gal-t3 short=b4gal-t3
g42506	b4gt3	4.35048	13.2175	3.03818	0.0186422	beta- -galactosyltransferase 3 short=beta- - ase 3 short=beta4gal-t3 short=b4gal-t3
g8390	b4gt3	81.4877	20.6144	0.252975	1.24768e-05	beta- -galactosyltransferase 3 short=beta- - ase 3 short=beta4gal-t3 short=b4gal-t3
g36081	b4gt4	12.1394	33.1988	2.73479	0.0258895	beta- -galactosyltransferase 4 short=beta- - ase 4 short=beta4gal-t4 short=b4gal-t4
g43148	b915	17.9445	60.871	3.39218	0.000416704	maternal protein
g38667	ba2l1	15.502	35.3394	2.27967	0.0246808	protein bat2-like 1
g23761	ba2l1	147.147	320.133	2.17559	0.0118564	protein bat2-like 1
g32080	bacd2	4.23418	16.0476	3.79002	0.00197036	btb poz domain-containing adapter for cul3-mediated degradation protein 2
g38532	bacd3	28.593	85.2341	2.98094	0.000640581	btb poz domain-containing adapter for cul3-mediated degradation protein 3
g25666	bace2	639.953	353.668	0.552647	0.033945	beta-secretase 2
g19426	bag2	307.738	161.251	0.52399	0.0343231	bag family molecular chaperone regulator 2 short=bag-2
g21720	bahc1	52.578	12.9426	0.246159	2.41553e-05	bah and coiled-coil domain-containing protein 1
g5330	bai1	0.613761	10.169	16.5684	0.00322303	brain-specific angiogenesis inhibitor 1 flags: precursor
g36328	baip2	22.79	69.6457	3.05597	0.00095236	brain-specific angiogenesis inhibitor 1-associated protein 2 short=bai-associated protein 2 short=bai1-associated protein 2
g18378	baip2	2198.86	1271.32	0.578171	0.0386738	brain-specific angiogenesis inhibitor 1-associated protein 2 short=bai-associated protein 2 short=bai1-associated protein 2
g35236	bakor	19.6443	44.4398	2.26222	0.0133726	beclin 1-associated autophagy-related key regulator short=barkor
g42006	banp	4.40539	11.5969	2.63243	0.0343839	protein banp
g39063	bap1	21.6504	75.2114	3.47391	0.00292007	ubiquitin carboxyl-terminal hydrolase bap1
g31979	bap1	11.8293	28.7833	2.43321	0.0237379	ubiquitin carboxyl-terminal hydrolase bap1
g265	bat2	1071.53	574.525	0.536174	0.0275408	large proline-rich protein bat2
g19472	bat5	73.4325	249.857	3.40254	4.41801e-05	protein bat5
g3319	batf	606.224	115.865	0.191126	0.0263439	basic leucine zipper transcriptional factor atf-like
g10609	baz1a	65.7353	28.266	0.429997	0.00431199	bromodomain adjacent to zinc finger domain protein 1a
g39220	baz1b	15.4821	47.6584	3.07829	0.00804755	tyrosine-protein kinase baz1b
g43141	baz1b	3.01115	9.05227	3.00625	0.0374801	tyrosine-protein kinase baz1b
g29099	baz2b	334.362	183.3	0.54821	0.03622	bromodomain adjacent to zinc finger domain protein 2b
g24452	baz2b	39.0871	18.2514	0.466941	0.0197471	bromodomain adjacent to zinc finger domain protein 2b
g16405	bbs5	319.415	168.278	0.526831	0.0265781	bardet-biedl syndrome 5 protein homolog
g2142	bbx	303.344	158.227	0.521607	0.03399	hmg box transcription factor bbx
g27695	bc11a	1.94939	7.47959	3.83689	0.0176599	b-cell lymphoma leukemia 11a short=bcl-11a
g17298	bc7ba	70.41	39.3382	0.558702	0.0398354	b-cell cll lymphoma 7 protein family member b-a
g18269	bcap	30.0104	10.0131	0.333654	0.00232044	phosphoinositide 3-kinase adapter protein 1
g34369	bcar1	15.358	44.2912	2.88392	0.0209652	breast cancer anti-estrogen resistance protein 1
g43621	bcar1	25.4692	69.9852	2.74783	0.00625221	breast cancer anti-estrogen resistance protein 1
g34613	bcar1	14.8577	37.4797	2.52258	0.0472233	breast cancer anti-estrogen resistance protein 1
g12706	bcar3	14.0132	34.1027	2.43361	0.0146936	breast cancer anti-estrogen resistance protein 3
g19895	bcar3	70.222	132.763	1.89061	0.0473211	breast cancer anti-estrogen resistance protein 3
g12476	bcat1	299.092	154.264	0.515773	0.019516	branched-chain-amino-acid cytosolic short=bcat
g12475	bcat1	102.912	48.8722	0.474891	0.0152586	branched-chain-amino-acid cytosolic short=bcat
g9809	bcdo1	158.238	387.384	2.4481	0.010156	-carotene -monooxygenase
g4847	bcdo2	60.068	5.51178	0.091759	0.0460259	-carotene 9 -oxygenase
g18268	bckd	1229.68	617.218	0.501934	0.0202239	mitochondrial
g10483	bckd	208.448	87.142	0.418052	0.00292621	mitochondrial
g7294	bcl2	55.5151	20.7639	0.374022	0.00176648	apoptosis regulator bcl-2
g8224	bcl2	22.3951	7.49201	0.334537	0.00259303	apoptosis regulator bcl-2
g35769	bcor	46.4127	23.2561	0.501071	0.0213961	bcl-6 corepressor short=b
g26198	bcor	62.3554	25.6096	0.410704	0.00486182	bcl-6 corepressor short=b
g32534	bcor	6.18261	1.61591	0.261364	0.0141649	bcl-6 corepressor short=b
g10252	bcr	59.9258	34.0017	0.567397	0.0407441	breakpoint cluster region protein
g35882	bcs1	2.46675	9.45748	3.83399	0.0108522	mitochondrial chaperone bcs1
g6169	bdh	269.729	131.597	0.487887	0.0111321	d-beta-hydroxybutyrate mitochondrial short=bdh
g31475	becn1	13.2405	60.2525	4.55062	9.92087e-06	beclin-1
g34072	becn1	7.26715	29.7487	4.09358	0.000234301	beclin-1
g40380	becn1	15.9811	47.5302	2.97415	0.00186901	beclin-1
g22052	becn1	128.014	235.31	1.83816	0.044958	beclin-1
g15651	best2	422.974	212.461	0.502301	0.0167327	bestrophin-2
g1175	bgh3	1422.98	659.982	0.463802	0.0125226	transforming growth factor-beta-induced protein ig-h3 short=beta ig-h3
g35645	bi1	92.2027	233.802	2.53574	0.000693474	bax inhibitor 1 short=bi-1
g7599	bi2l1	3.09395	15.1213	4.88738	0.0260374	brain-specific angiogenesis inhibitor 1-associated protein 2-like protein 1 short=bai1-associated protein 2-like protein 1
g7597	bi2l1	8.61755	34.8272	4.04142	0.011681	brain-specific angiogenesis inhibitor 1-associated protein 2-like protein 1 short=bai1-associated protein 2-like protein 1
g27039	bic1a	14.3612	4.22437	0.294152	0.00664742	protein bicaudal c homolog 1-a short=bic-c-a
g1011	bic1b	298.191	88.7966	0.297785	0.00490343	protein bicaudal c homolog 1-b short=bic-c-b
g1010	bic1b	24.2824	5.91651	0.243654	0.000130833	protein bicaudal c homolog 1-b short=bic-c-b
g30046	bicc1	22.018	6.26284	0.284443	0.00137141	protein bicaudal c homolog 1 short=bic-c
g5062	bicd2	769.648	338.235	0.439467	0.00352651	protein bicaudal d homolog 2 short=bic-d 2
g28085	bicd2	8.45164	1.29824	0.153608	0.0014216	protein bicaudal d homolog 2 short=bic-d 2
g3881	bicr1	97.4627	28.8396	0.295904	0.000539344	bicaudal d-related protein 1 short=bicd-related protein 1 short=bicdr-1
g15808	bid	109.547	204.163	1.8637	0.0277835	bh3-interacting domain death agonist
g19422	biea	111.212	60.3612	0.542756	0.0384664	biliverdin reductase a short=bvr a
g8511	bin2	488.171	151.788	0.310932	7.26695e-05	bridging integrator 2
g7512	bin3	515.37	293.943	0.570354	0.0361034	bridging integrator 3
g38965	birc6	4.20446	16.0678	3.82161	0.00143922	baculoviral iap repeat-containing protein 6
g32696	birc6	5.11877	16.0301	3.13163	0.0078887	baculoviral iap repeat-containing protein 6
g44847	birc6	12.1997	29.9782	2.45729	0.0134914	baculoviral iap repeat-containing protein 6
g6974	blcap	967.002	557.482	0.576505	0.0352301	bladder cancer-associated protein
g3301	bm1la	101.896	196.275	1.92622	0.0326724	breast cancer metastasis-suppressor 1-like protein-a
g11115	bmi1	76.814	34.1872	0.445065	0.00870938	polycomb complex protein bmi-1
g9488	bmp5	600.082	168.341	0.280529	8.06859e-05	bone morphogenetic protein 5 short=bmp-5 flags: precursor
g4370	bmp7	87.7268	45.6337	0.520179	0.0405628	bone morphogenetic protein 7 short=bmp-7
g10937	bmper	11.9575	26.1994	2.19104	0.0447445	bmp-binding endothelial regulator protein
g28859	bmpr2	42.2021	16.7314	0.396458	0.00610811	bone morphogenetic protein receptor type-2 short=bmp type-2 receptor short=bmpr-2
g22847	bmr1a	664.965	311.965	0.469145	0.00898366	bone morphogenetic protein receptor type-1a short=bmp type-1a receptor short=bmpr-1a
g26663	bmr1b	38.0333	14.2879	0.375666	0.0155137	bone morphogenetic protein receptor type-1b short=bmp type-1b receptor short=bmpr-1b
g6478	bni3l	303.697	1173.11	3.86276	2.16397e-06	bcl2 adenovirus e1b 19 kda protein-interacting protein 3-like
g693	bni3l	786.339	1630.59	2.07364	0.0110272	bcl2 adenovirus e1b 19 kda protein-interacting protein 3-like
g43796	bnip2	3.52952	30.6028	8.67055	2.42853e-07	bcl2 adenovirus e1b 19 kda protein-interacting protein 2
g1065	bnipl	238.026	81.8261	0.343769	0.000486273	bcl-2 adenovirus e1b 19 kda-interacting protein 2-like protein
g33787	bptf	13.3999	34.1904	2.55154	0.00810733	nucleosome-remodeling factor subunit bptf
g22104	braf	35.4129	18.1382	0.512192	0.0361455	serine threonine-protein kinase b-raf
g23239	brca2	5.84432	0.788024	0.134836	0.00227772	breast cancer type 2 susceptibility protein homolog
g39399	brd1	1.40205	6.64327	4.73824	0.0116151	bromodomain-containing protein 1
g33663	brd1	2.21356	7.97872	3.60448	0.0131481	bromodomain-containing protein 1
g34314	brd2	14.7972	3.94824	0.266823	0.00152042	bromodomain-containing protein 2
g43671	brd4	23.7666	6.34345	0.266906	0.000258335	bromodomain-containing protein 4
g30178	brd7	14.7513	33.7228	2.28609	0.0178153	bromodomain-containing protein 7
g41991	BRE	11.6188	27.5706	2.37292	0.0141084	4.01e-23
g7596	bri3	705.715	359.646	0.50962	0.0204951	brain protein i3
g45021	brpf1	2.04127	9.38315	4.59673	0.00372046	peregrin
g42453	brpf3	5.40105	17.1162	3.16905	0.00601269	bromodomain and phd finger-containing protein 3
g42332	brpf3	7.89009	18.1823	2.30445	0.0365924	bromodomain and phd finger-containing protein 3
g3487	brsk2	1293.77	2675.25	2.06779	0.0136975	br serine threonine-protein kinase 2
g31360	bsdc1	43.2804	84.9904	1.96372	0.0394121	bsd domain-containing protein 1
g5863	bsdc1	279.24	123.045	0.440642	0.00635217	bsd domain-containing protein 1
g29200	bsdc1	52.5714	18.9862	0.36115	0.000932803	bsd domain-containing protein 1
g1573	bsn	11.2212	1.21292	0.108092	0.00840197	protein bassoon
g21641	btbbb	139.735	64.5386	0.461865	0.0222476	ankyrin repeat and btb poz domain-containing protein btbd11-b
g16411	btbd3	307.402	136.172	0.442978	0.00506058	btb poz domain-containing protein 3
g43764	btbd6	7.57068	17.2534	2.27898	0.0485649	btb poz domain-containing protein 6
g36403	btd	27.0333	250.598	9.26995	0.00022046	biotinidase short=biotinase flags: precursor
g44612	btd	5.55757	28.9956	5.21731	0.0292111	biotinidase short=biotinase flags: precursor
g33343	btd	7.32642	17.6981	2.41565	0.0435135	biotinidase short=biotinase flags: precursor
g2946	btf3	944.716	2203.98	2.33296	0.00356197	transcription factor btf3
g34554	btg1	23.9234	48.1385	2.01219	0.0320086	protein btg1
g3790	btg1	2001.93	926.737	0.462922	0.00695047	protein btg1
g16825	btnl2	40.0677	20.8855	0.521256	0.0274639	butyrophilin-like protein 2
g11975	btnl2	15.0927	3.35031	0.221982	0.00047937	butyrophilin-like protein 2
g23714	bub1	7.75239	1.63949	0.211481	0.0398835	mitotic checkpoint serine threonine-protein kinase bub1 short=mbub1
g21358	bub1	5.29334	0.671951	0.126943	0.0359349	mitotic checkpoint serine threonine-protein kinase bub1 short=hbub1
g12758	bzw1a	4561.92	2147.17	0.470671	0.00511914	basic leucine zipper and w2 domain-containing protein 1-a
g12447	c163a	1.77713	6.55932	3.69096	0.0191341	scavenger receptor cysteine-rich type 1 protein m130 ame: cd_antigen=cd163 contains:
g16653	c166a	135.618	494.121	3.64347	1.26151e-05	cd166 antigen homolog a
g6371	c1glc	654.379	360.793	0.551352	0.0303794	c1galt1-specific chaperone 1
g36845	c1gta	7.14536	32.422	4.53749	0.000117063	glycoprotein-n-acetylgalactosamine 3-beta-galactosyltransferase 1-a
g17079	c1ql4	1140.48	13.3269	0.0116853	1.6892e-05	complement c1q-like protein 4
g8546	c1qt1	352.803	70.0561	0.19857	0.0011701	complement c1q tumor necrosis factor-related protein 1 flags: precursor
g4862	c1qt5	21.3165	10.0991	0.473768	0.0290982	complement c1q tumor necrosis factor-related protein 5 flags: precursor
g39556	c1qt7	1.25224	13.7959	11.017	5.09858e-06	complement c1q tumor necrosis factor-related protein 7 flags: precursor
g3433	c1tc	177.226	318.849	1.79911	0.0405804	c-1-tetrahydrofolate cytoplasmic short=c1-thf synthase includes:
g13523	c2c2l	210.79	78.7199	0.373452	0.000564895	c2 domain-containing protein 2-like
g41558	c2d2a	8.45745	2.46548	0.291516	0.0100415	coiled-coil and c2 domain-containing protein 2a
g23409	c43bp	418.369	190.415	0.455137	0.0360081	collagen type iv alpha-3-binding protein
g6883	c43bp	194.373	35.8684	0.184534	0.000609754	collagen type iv alpha-3-binding protein
g14584	ca095	301.223	156.641	0.520017	0.0433348	uncharacterized transmembrane protein c1orf95 homolog
g6562	ca112	39.4959	10.3132	0.261121	0.0017045	uncharacterized protein c1orf112 homolog
g7361	ca128	284.408	721.118	2.53551	0.00115628	upf0424 protein c1orf128 homolog
g27054	ca144	5.56651	18.3953	3.30463	0.00462997	upf0485 protein c1orf144 homolog
g403	ca2d1	148.387	71.7878	0.483786	0.0219679	voltage-dependent calcium channel subunit alpha-2 delta-1
g1584	ca2d2	23.6695	7.88581	0.333164	0.0211447	voltage-dependent calcium channel subunit alpha-2 delta-2
g1363	ca2d2	11.5665	3.13431	0.270982	0.00529668	voltage-dependent calcium channel subunit alpha-2 delta-2
g1364	ca2d2	3.39255	0.583663	0.172043	0.0244434	voltage-dependent calcium channel subunit alpha-2 delta-2
g7528	cabin	494.529	170.585	0.344944	0.000271419	calcineurin-binding protein cabin-1
g32804	cabin	36.7334	11.4591	0.311953	0.000671585	calcineurin-binding protein cabin-1
g3598	cabl2	53.0563	20.5435	0.387202	0.0045015	cdk5 and abl1 enzyme substrate 2
g8578	cac1b	1.32047	0	0	0.040114	voltage-dependent n-type calcium channel subunit alpha-1b
g5620	cac1c	24.0809	8.15947	0.338835	0.0122045	voltage-dependent l-type calcium channel subunit alpha-1c
g34542	cac1f	4.95749	22.509	4.54041	0.000351107	voltage-dependent l-type calcium channel subunit alpha-1f
g5189	cac1g	10.7791	4.32141	0.400907	0.0316243	voltage-dependent t-type calcium channel subunit alpha-1g
g38188	cac1i	6.48114	37.6251	5.80531	2.56496e-06	voltage-dependent t-type calcium channel subunit alpha-1i
g13064	cac1s	22.9347	6.98521	0.304569	0.00175069	dihydropyridine-sensitive l-type skeletal muscle calcium channel subunit alpha-1
g17027	cacb1	19.6076	8.52951	0.435009	0.0422639	voltage-dependent l-type calcium channel subunit beta-1 short=cab1
g19848	cacb4	15.0658	5.48007	0.363742	0.0198865	voltage-dependent l-type calcium channel subunit beta-4 short=cab4
g13850	caco2	1213	641.734	0.529046	0.0251839	calcium-binding and coiled-coil domain-containing protein 2
g11108	cacp	250.263	119.153	0.47611	0.0132571	carnitine o-acetyltransferase short=carnitine acetylase
g23908	cad11	45.9207	100.417	2.18675	0.0289565	cadherin-11 flags: precursor
g4960	cad11	68.6391	21.3041	0.310378	0.000313949	cadherin-11
g11366	cad15	8.36035	0.773421	0.0925107	0.000140304	cadherin-15
g36820	cad26	1.83854	8.74251	4.75514	0.00254699	cadherin-like protein 26
g33587	cad26	27.1951	63.565	2.33737	0.0121295	cadherin-like protein 26 flags: precursor
g1031	cad26	8.1843	1.17248	0.143259	0.0106626	cadherin-like protein 26
g44751	cadh1	41.2371	80.6853	1.95662	0.0304601	cadherin-1
g1024	cadh2	3.18652	9.1487	2.87107	0.0245172	cadherin-2
g10000	cadh2	16.4718	4.29377	0.260673	0.00987219	cadherin-2
g25305	cadhk	35.7599	5.03069	0.14068	9.82422e-08	b-cadherin
g35631	cadm1	0.788122	7.26113	9.2132	0.0452552	cell adhesion molecule 1
g17294	cadm1	6.39305	24.8079	3.88045	0.0364781	cell adhesion molecule 1
g9834	cadm1	80.2251	239.466	2.98492	0.0176343	cell adhesion molecule 1
g28779	cadm3	1.93768	26.2338	13.5388	0.0258546	cell adhesion molecule 3
g23061	cadm4	58.3154	23.073	0.395658	0.00332544	cell adhesion molecule 4
g20447	cadm4	290.832	66.6301	0.229102	0.00114664	cell adhesion molecule 4
g7855	cadn	13.6454	5.14782	0.377257	0.0432862	neural-cadherin
g13210	cah12	60.8069	12.9621	0.213169	1.71511e-05	carbonic anhydrase 12
g17843	cah9	13216.2	35919.2	2.71783	0.00037197	carbonic anhydrase 9
g21299	cahd1	45.1117	16.2192	0.359534	0.0046716	vwfa and cache domain-containing protein 1 short=cache domain-containing protein 1 flags: precursor
g3437	cahz	1052.68	7825.27	7.43364	1.05441e-05	carbonic anhydrase
g18940	cald1	18.9657	2.46943	0.130204	9.00029e-05	caldesmon short=cdm
g5201	calgl	157.133	22.1699	0.14109	1.86751e-05	calglandulin
g35964	calm	32.5235	133.464	4.10363	7.75276e-06	calmodulin short=
g7488	calm	3189.42	1278.27	0.400783	0.00119545	calmodulin short=
g14259	calr	1159.84	2194.12	1.89174	0.0261916	calreticulin
g11010	calrl	665.506	359.399	0.540039	0.040142	calcitonin gene-related peptide type 1 receptor short=cgrp type 1 receptor
g16101	calrl	922.322	478.236	0.518512	0.0269117	calcitonin gene-related peptide type 1 receptor short=cgrp type 1 receptor
g50	camkv	0.4299	6.51082	15.145	0.00351817	kinase-like vesicle-associated protein
g9383	camlg	46.7248	24.7188	0.52903	0.0397422	calcium signal-modulating cyclophilin ligand short=caml
g30093	camp2	14.0961	48.2607	3.42369	0.0171059	calmodulin-regulated spectrin-associated protein 2
g8745	can1	629.283	3149.48	5.00487	5.33701e-07	calpain-1 catalytic subunit
g11640	can2	1.26042	35.7478	28.3618	1.66291e-12	calpain-2 catalytic subunit
g28294	can2	15.6696	3.76315	0.240155	0.0361472	calpain-2 catalytic subunit
g28441	canb1	241.824	96.5047	0.399071	0.0017743	calcineurin subunit b type 1
g45891	cant1	0	13.4426	Inf	6.66142e-10	soluble calcium-activated nucleotidase 1 short=scan-1
g35447	cant1	17.6132	44.9439	2.55172	0.00611103	soluble calcium-activated nucleotidase 1 short=scan-1
g30825	canx	21.1358	9.90453	0.468614	0.0308921	calpain-1 catalytic subunit
g17986	canx	363.152	127.006	0.349733	0.000385544	calpain-1 catalytic subunit
g22853	cap2	1015.03	499.87	0.492466	0.0174879	adenylyl cyclase-associated protein 2 short=cap 2
g3657	capon	61.9964	30.9481	0.499193	0.0228183	carboxyl-terminal pdz ligand of neuronal nitric oxide synthase protein
g25002	capr1	178.876	97.2474	0.543658	0.0417425	caprin-1
g23241	casp	94.1419	180.847	1.921	0.0313193	protein casp
g25621	casp5	6.92591	19.1976	2.77185	0.016142	caspase-5 short=casp-5
g12969	casp6	325.464	151.194	0.464551	0.031564	caspase-6 short=casp-6 contains:
g7474	casp9	238.114	116.787	0.490465	0.00849446	caspase-9 short=casp-9
g10828	catf	5688.81	13929.2	2.44853	0.00655714	cathepsin f flags: precursor
g1918	catk	2.97023	0.193189	0.065042	0.00890613	cathepsin k flags: precursor
g10929	catl1	1586.49	4024.75	2.53688	0.00188845	cathepsin l1 contains:
g10930	catl2	750.795	1417.73	1.88831	0.0350042	cathepsin l2
g43890	catz	20.005	109.961	5.49668	1.64774e-07	cathepsin z
g37332	caza2	11.9068	56.7039	4.76232	3.78143e-06	f-actin-capping protein subunit alpha-2
g34041	caza2	58.548	107.822	1.8416	0.0396267	f-actin-capping protein subunit alpha-2
g45863	cb024	8.52999	25.129	2.94596	0.00692771	uncharacterized protein c2orf24 homolog
g8457	cb069	95.0818	226.423	2.38135	0.00501214	upf0565 protein c2orf69 homolog flags: precursor
g29680	cb39l	46.6859	83.3775	1.78592	0.0492592	calcium-binding protein 39-like
g5976	cbl	751.802	207.268	0.275695	0.00462199	e3 ubiquitin-protein ligase cbl
g42999	cbp	8.955	23.3141	2.60348	0.0142405	creb-binding protein
g24392	cbp	270.636	127.814	0.472274	0.0101875	creb-binding protein
g26162	cbp	17.7108	6.26341	0.35365	0.01059	creb-binding protein
g12580	cbpc1	55.9726	137.142	2.45017	0.00271359	cytosolic carboxypeptidase 1
g35836	cbpd	4.51421	14.2428	3.15509	0.0138402	carboxypeptidase d
g45732	cbpd	12.85	36.4292	2.83496	0.00299497	carboxypeptidase d
g41687	cbpd	5.92873	16.7884	2.83171	0.00967481	carboxypeptidase d
g43754	cbpz	5.0787	15.4911	3.05021	0.0100716	carboxypeptidase z short=cpz short=ccpz flags: precursor
g9213	cbr1	76.9035	211.446	2.74949	0.00256367	carbonyl reductase
g14699	cbr4	119.061	227.54	1.91112	0.0268744	carbonyl reductase family member 4
g18133	cbx7	318.409	168.844	0.530275	0.0222865	chromobox protein homolog 7
g9237	cbx8	48.5364	17.5378	0.361333	0.00165577	chromobox protein homolog 8
g25830	cc032	290.718	57.6346	0.198249	4.27591e-07	uncharacterized protein c3orf32
g25831	cc032	2314.96	346.462	0.149662	1.32493e-09	uncharacterized protein c3orf32
g26479	cc032	2.01293	0.197239	0.0979859	0.0423454	uncharacterized protein c3orf32
g22969	cc059	21.6325	7.93333	0.366732	0.00699314	uncharacterized protein c3orf59 homolog
g12914	cc111	60.3887	122.755	2.03275	0.031426	coiled-coil domain-containing protein 111 homolog
g14586	cc123	44.1711	19.5623	0.442877	0.0106881	coiled-coil domain-containing protein mitochondrial flags: precursor
g37497	cc124	32.0404	173.95	5.42909	1.16964e-07	coiled-coil domain-containing protein 124
g9859	cc134	120.554	32.3598	0.268426	1.18202e-05	coiled-coil domain-containing protein 134 flags: precursor
g34480	cc136	57.0908	24.2148	0.424145	0.0458949	coiled-coil domain-containing protein 136
g13257	cc141	36.8984	11.6992	0.317065	0.0317754	coiled-coil domain-containing protein 141
g26999	cc147	3.27407	0.21809	0.0666112	0.0237919	coiled-coil domain-containing protein 147
g16227	cc147	3.43286	0.223687	0.0651607	0.00224667	coiled-coil domain-containing protein 147
g20523	cc14a	72.6968	31.4127	0.432105	0.0116953	dual specificity protein phosphatase cdc14a
g36037	cc50b	6.6151	15.564	2.3528	0.0412618	cell cycle control protein 50b
g16855	cc85a	3.57524	0.404681	0.11319	0.0120849	coiled-coil domain-containing protein 85a
g13770	cc85c	320.899	870.815	2.71367	0.003844	coiled-coil domain-containing protein 85c
g4123	cc90b	193.484	411.99	2.12932	0.0112361	coiled-coil domain-containing protein mitochondrial flags: precursor
g4353	ccbe1	37.0978	12.161	0.327808	0.0138522	collagen and calcium-binding egf domain-containing protein 1
g4442	ccd15	139.181	52.4695	0.376988	0.000927323	coiled-coil domain-containing protein 15
g6267	ccd18	137.144	64.7065	0.471813	0.0106589	coiled-coil domain-containing protein 18
g15643	ccd22	314.918	173.318	0.55036	0.0434861	coiled-coil domain-containing protein 22
g14362	ccd30	153.948	59.6977	0.387778	0.00229189	coiled-coil domain-containing protein 30
g15228	ccd39	17.5572	2.05454	0.11702	0.000109317	coiled-coil domain-containing protein 39
g22489	ccd47	43.6626	8.47796	0.19417	4.54612e-06	coiled-coil domain-containing protein 47 flags: precursor
g9996	ccd48	23.397	5.87845	0.251248	0.000745945	coiled-coil domain-containing protein 48
g21014	ccd61	13.2398	30.7855	2.32523	0.0198051	coiled-coil domain-containing protein 61
g757	ccd69	109.347	41.8989	0.383176	0.00707449	coiled-coil domain-containing protein 69
g11382	ccd71	268.239	150.39	0.560659	0.042991	coiled-coil domain-containing protein 71
g3011	ccd78	7.59365	2.07851	0.273717	0.0120986	coiled-coil domain-containing protein 78
g45258	ccd80	239.125	129.927	0.543343	0.0341761	coiled-coil domain-containing protein 80 flags: precursor
g3578	ccd80	1061.2	458.505	0.432061	0.0255267	coiled-coil domain-containing protein 80 flags: precursor
g8282	ccd97	46.415	104.171	2.24435	0.0117824	coiled-coil domain-containing protein 97
g8725	ccdc3	531.685	2660.02	5.00299	8.64903e-08	coiled-coil domain-containing protein 3
g2288	ccdc3	255.294	568.977	2.22871	0.0042856	coiled-coil domain-containing protein 3
g1016	ccdc6	42.3519	16.2994	0.384857	0.00241677	coiled-coil domain-containing protein 6
g6595	ccg3	0	2.17236	Inf	0.0160881	voltage-dependent calcium channel gamma-3 subunit
g26647	ccg5	3.9664	0	0	0.0381987	voltage-dependent calcium channel gamma-5 subunit
g11604	ccl19	220.983	19.207	0.0869165	0.00390211	c-c motif chemokine 19
g1848	ccl25	677.572	110.579	0.163198	0.00503144	c-c motif chemokine 25
g7108	ccnb1	1.32433	0	0	0.0399978	g2 mitotic-specific cyclin-b1
g20192	ccnd1	13.8709	4.89887	0.353176	0.0205811	g1 s-specific cyclin-d1
g12104	ccnd2	4.48511	1.13503	0.253065	0.0360122	g1 s-specific cyclin-d2
g38564	ccng1	162.805	490.575	3.01326	0.000338876	cyclin-g1
g44511	ccnl1	238.638	503.064	2.10806	0.0176992	cyclin-l1 short=cyclin-l
g11074	ccnt2	158.027	88.3133	0.558848	0.0393608	cyclin-t2 short= 2
g3403	ccny	288.6	142.121	0.492448	0.00836762	cyclin-y short=cyc-y
g5257	ccr9	64.7135	19.1692	0.296216	0.00034401	c-c chemokine receptor type 9 short=c-c ckr-9 short=cc-ckr-9 short=ccr-9
g6438	ccrl1	24.0391	75.978	3.1606	0.000226579	c-c chemokine receptor type 11 short=c-c ckr-11 short=cc-ckr-11 short=ccr-11
g249	ccz1	178.469	393.063	2.20241	0.00736711	vacuolar fusion protein ccz1 homolog
g14089	cd029	751.486	431.991	0.574848	0.0413239	uncharacterized protein c4orf29 homolog flags: precursor
g28198	cd031	16.7494	56.614	3.38006	0.045555	fibronectin type-iii domain-containing protein c4orf31 flags: precursor
g37563	cd031	11.6132	35.2453	3.03493	0.0497091	fibronectin type-iii domain-containing protein c4orf31 flags: precursor
g15684	cd034	1509.82	593.42	0.393041	0.00160125	uncharacterized protein c4orf34
g44946	cd123	11.1132	32.6192	2.93517	0.00807513	cell division cycle protein 123 homolog
g25781	cd151	348.215	658.087	1.88989	0.0390712	cd151 antigen
g7941	cd158	57.2476	523.631	9.14676	0.00380633	coiled-coil domain-containing protein 158
g39086	cd1d	43.162	209.726	4.85903	0.00102968	antigen-presenting glycoprotein cd1d
g32022	cd22	14.0414	2.14619	0.152847	0.000378514	b-cell receptor cd22
g21486	cd22	25.342	1.72402	0.0680301	5.47558e-10	b-cell receptor cd22
g42748	cd248	10.2416	29.6438	2.89444	0.00333372	endosialin
g19079	cd276	14.8322	96.5855	6.51189	2.73338e-08	cd276 antigen
g43115	cd276	29.725	82.1706	2.76436	0.00107923	cd276 antigen homolog ame: cd_antigen=cd276 flags: precursor
g38633	cd302	55.1454	213.49	3.87141	1.17593e-05	cd302 antigen
g35001	cd36	0.519415	11.0735	21.3192	1.58764e-06	platelet glycoprotein 4
g15991	cd44	129.648	792.985	6.11646	3.35165e-09	cd44 antigen
g4156	cd63	183.645	59.7037	0.325104	0.000687385	cd63 antigen
g2063	cd68	3937.03	1210.97	0.307585	0.00028523	macrosialin
g22254	cd81	294.809	727.835	2.46884	0.00160896	cd81 antigen
g22820	cd81	2912.99	1454.08	0.499169	0.0174762	cd81 antigen ame: cd_antigen=cd81
g356	cd9	1972.21	3539.03	1.79445	0.0310375	cd9 antigen ame: cd_antigen=cd9
g10976	cd9	19989.6	1494.21	0.0747491	2.67203e-07	cd9 antigen ame: cd_antigen=cd9
g3451	cda7l	28.2107	9.87824	0.350159	0.00298007	cell division cycle-associated 7-like protein
g43975	cdac1	12.4644	4.24348	0.340448	0.00694707	cytidine and dcmp deaminase domain-containing protein 1
g40785	cdac1	1.40232	0	0	0.0266609	cytidine and dcmp deaminase domain-containing protein 1
g37245	cdc27	4.04956	10.2008	2.51898	0.0424032	cell division cycle protein 27 homolog
g34009	cdc42	16.0297	39.2024	2.44562	0.0100125	cell division control protein 42 homolog flags: precursor
g20761	cdc42	102.808	192.746	1.87481	0.0353999	cell division control protein 42 homolog
g6919	cdc45	13.2001	3.47244	0.263061	0.0471982	cell division control protein 45 homolog
g34905	cdc5l	25.0207	55.2503	2.20818	0.0172518	cell division cycle 5-related protein
g1488	cdc73	4.59103	16.6571	3.62818	0.00237365	parafibromin
g26761	cdca2	142.15	52.8115	0.37152	0.00134918	cell division cycle-associated protein 2
g7831	cdca4	1413.28	627.765	0.444191	0.00288486	cell division cycle-associated protein 4
g33825	cdcp1	9.32444	20.7071	2.22074	0.0411625	cub domain-containing protein 1
g20769	cdk12	14.7775	34.4062	2.32828	0.0157612	cell division protein kinase 12
g30976	cdk13	11.632	3.69267	0.317459	0.00917161	cell division protein kinase 13
g1378	cdk16	757.67	408.002	0.538496	0.0291904	cell division protein kinase 16
g44279	cdk9b	10.5411	34.3188	3.2557	0.000950076	cell division protein kinase 9-b
g14141	cdka2	51.2429	156.662	3.05725	0.000314506	cyclin-dependent kinase 2-associated protein 2 short=cdk2-associated protein 2
g9514	cdkl2	12.628	2.48454	0.196749	0.000190892	cyclin-dependent kinase-like 2
g11409	cdn1b	441.662	1250.44	2.83122	0.0102429	cyclin-dependent kinase inhibitor 1b
g27795	cdon	53.8114	149.885	2.78538	0.00238007	cell adhesion molecule-related down-regulated by oncogenes flags: precursor
g235	cdr2	236.767	89.9103	0.379742	0.00103854	cerebellar degeneration-related protein 2
g5428	cdr2	20.9735	6.34001	0.302287	0.030158	cerebellar degeneration-related protein 2
g22109	cdr2l	128.571	54.4768	0.423712	0.0057028	cerebellar degeneration-related protein 2-like
g8189	cdr2l	22.0815	7.22246	0.327081	0.00159224	cerebellar degeneration-related protein 2-like
g18228	cds2	633.25	241.676	0.381644	0.000452699	phosphatidate cytidylyltransferase 2
g22322	cdt1	7.98472	1.39438	0.174632	0.00485101	dna replication factor cdt1 short=xcdt1
g2031	cdyl	141.398	77.1699	0.545765	0.0432356	chromodomain y-like protein short=cdy-like
g16591	cdyl2	4.64396	0.873904	0.188181	0.0141877	chromodomain y-like protein 2 short=cdy-like 2
g13585	ce034	8.8254	20.104	2.27797	0.0206212	uncharacterized protein c5orf34 homolog
g38371	ce041	5.2021	16.0298	3.0814	0.0187074	upf0474 protein c5orf41
g16421	ce041	110.561	41.7645	0.377751	0.000826508	upf0474 protein c5orf41 homolog
g2432	ce290	294.052	151.219	0.514261	0.0201427	centrosomal protein of 290 kda short=cep290
g26788	ce350	9.71295	22.1238	2.27777	0.0229895	centrosome-associated protein 350 short=cep350
g7255	ceam5	2117.27	4177.44	1.97303	0.0224934	carcinoembryonic antigen-related cell adhesion molecule 5
g16641	cebpa	8186.77	16027.8	1.95777	0.025706	ccaat enhancer-binding protein alpha short=c ebp alpha
g5617	cecr5	858.173	160.093	0.186551	2.41197e-09	cat eye syndrome critical region protein 5 homolog flags: precursor
g3074	cegt	207.053	86.8945	0.419673	0.0289508	ceramide glucosyltransferase
g17423	celf3	5.27706	1.61149	0.305376	0.0351299	cugbp elav-like family member 3 short=celf-3
g26855	celf3	7.41726	1.48106	0.199678	0.00134568	cugbp elav-like family member 3 short=celf-3
g347	celr1	377.403	874.695	2.31767	0.0105001	cadherin egf lag seven-pass g-type receptor 1 flags: precursor
g24066	celr1	10.9429	2.55159	0.233172	0.00244115	cadherin egf lag seven-pass g-type receptor 1 flags: precursor
g7010	cenpf	326.269	177.152	0.542964	0.0199091	centromere protein f short=cenp-f
g15450	cenpk	51.9562	9.41491	0.181209	2.25692e-07	centromere protein k short=cenp-k
g2260	cenpp	6.08791	19.0627	3.13124	0.00488213	centromere protein p short=cenp-p
g8571	cenpw	25.3801	6.15128	0.242366	0.0022789	centromere protein w short=cenp-w
g12453	cept1	389.048	145.731	0.374584	0.000607539	choline ethanolaminephosphotransferase 1 short=mcept1
g32453	cerk1	2.39518	15.5958	6.51133	0.000874323	ceramide kinase short=mcerk
g43191	cerk1	7.79633	35.6467	4.57224	0.000920164	ceramide kinase short=mcerk
g16357	cetn1	131.963	64.2344	0.486762	0.0190757	centrin-1
g20631	cf089	791.498	455.359	0.575313	0.0463289	uncharacterized protein c6orf89 homolog
g2540	cf115	891.377	274.235	0.307654	0.0149098	costars family protein c6orf115 homolog
g7365	cf150	59.2372	5.4296	0.0916586	1.23985e-11	uncharacterized protein c6orf150
g7131	cf168	94.8578	32.8887	0.346715	0.0494248	uncharacterized protein c6orf168
g688	cf174	1.78843	0.125046	0.069919	0.0303479	uncharacterized protein c6orf174 homolog flags: precursor
g18437	cf186	17.267	43.1778	2.5006	0.0057883	upf0624 protein c6orf186 homolog flags: precursor
g24549	cf186	91.4248	48.3976	0.529371	0.0455773	upf0624 protein c6orf186 homolog flags: precursor
g11812	cf192	26.5519	52.2649	1.9684	0.0426118	mfs-type transporter c6orf192
g10023	cf204	188.556	83.5057	0.44287	0.026503	coiled-coil domain-containing protein c6orf204
g18429	cfad	865.644	2002.42	2.31321	0.00356382	counting factor associated protein d flags: precursor
g41989	cflar	21.3955	4.71425	0.220338	0.00078909	casp8 and fadd-like apoptosis regulator
g15954	cflar	30.3938	6.69585	0.220303	3.37613e-05	casp8 and fadd-like apoptosis regulator contains:
g26580	cftr	994.976	250.469	0.251734	0.000301912	cystic fibrosis transmembrane conductance regulator short=cftr
g5812	cg041	100.676	54.6931	0.54326	0.0410776	upf0452 protein c7orf41 homolog
g3717	cg043	136.374	69.2684	0.50793	0.0319589	uncharacterized protein c7orf43 homolog
g7183	cgat2	296.144	155.212	0.524111	0.0213467	chondroitin sulfate n-acetylgalactosaminyltransferase 2
g27803	cgt	149.653	69.7702	0.466213	0.0284384	2-hydroxyacylsphingosine 1-beta-galactosyltransferase
g4186	ch048	49.0486	20.8132	0.424338	0.0124821	uncharacterized protein c8orf48
g12124	ch25h	220.184	29.9873	0.136192	0.000423778	cholesterol 25-hydroxylase-like protein
g38358	ch60	17.2319	38.9268	2.259	0.0462445	60 kda heat shock mitochondrial
g39687	ch60	12.4907	27.4122	2.19461	0.0403248	60 kda heat shock mitochondrial
g13426	chadl	27.635	12.0432	0.435796	0.0174962	chondroadherin-like protein flags: precursor
g18032	chc10	188.266	386.331	2.05204	0.0150951	coiled-coil-helix-coiled-coil-helix domain-containing protein mitochondrial
g24888	chch3	3.2488	9.58333	2.9498	0.0390705	coiled-coil-helix-coiled-coil-helix domain-containing protein mitochondrial flags: precursor
g33180	chch6	39.0649	79.8922	2.04511	0.0196923	coiled-coil-helix-coiled-coil-helix domain-containing protein 6
g45489	chd2	16.0081	56.5038	3.52969	0.000185227	chromodomain-helicase-dna-binding protein 2 short=chd-2
g45106	chd4	31.95	81.0957	2.5382	0.00415921	chromodomain-helicase-dna-binding protein 4 short=chd-4
g39645	chd4	44.7552	113.382	2.53339	0.0204704	chromodomain-helicase-dna-binding protein 4 short=chd-4
g41064	chd7	3.1162	12.3052	3.94878	0.00365614	chromodomain-helicase-dna-binding protein 7 short=chd-7
g26722	chd7	73.7057	19.8795	0.269715	6.93226e-05	chromodomain-helicase-dna-binding protein 7 short=chd-7
g42776	chd7	3.00412	0.636319	0.211815	0.0420598	chromodomain-helicase-dna-binding protein 7 short=chd-7
g34979	chd7	6.56982	0.781397	0.118937	0.000360802	chromodomain-helicase-dna-binding protein 7 short=chd-7
g40039	chd9	4.95291	12.2594	2.4752	0.0295198	chromodomain-helicase-dna-binding protein 9 short=chd-9
g16171	chd9	974.513	555.248	0.56977	0.0480219	chromodomain-helicase-dna-binding protein 9 short=chd-9
g17641	chfr	486.316	203.766	0.418999	0.00194291	e3 ubiquitin-protein ligase chfr
g20776	chid1	3.44854	13.6794	3.96671	0.00234953	chitinase domain-containing protein 1 flags: precursor
g18538	chid1	20.371	59.377	2.91479	0.00102843	chitinase domain-containing protein 1 flags: precursor
g11068	chin	138.027	59.9426	0.434281	0.0199767	n-chimaerin
g2017	chio	9.12039	28.4296	3.11715	0.00134494	beta-chimaerin
g22065	chit1	57.2562	28.6981	0.501224	0.0234027	chitotriosidase-1
g15911	chka	153.385	36.5614	0.238365	2.81572e-06	choline kinase alpha short=ck
g42928	chm1a	10.3785	32.1109	3.09397	0.00218877	charged multivesicular body protein 1a
g39604	chm2b	10.5911	42.976	4.05773	8.36236e-05	charged multivesicular body protein 2b
g12960	chm2b	36.9768	16.3105	0.441099	0.0141677	charged multivesicular body protein 2b
g11084	chmp5	267.45	498.369	1.86341	0.0386662	charged multivesicular body protein 5
g23520	chpf2	56.5199	24.9248	0.440991	0.0112508	chondroitin sulfate glucuronyltransferase
g8197	chrd	15.4672	5.24551	0.339137	0.0144619	chordin
g40326	chsp1	17.4468	52.1683	2.99014	0.0365663	calcium-regulated heat stable protein 1
g29147	chss3	7.0573	2.21461	0.313804	0.0313277	chondroitin sulfate synthase 3
g2796	chst8	21.0118	5.90428	0.280998	0.0421404	carbohydrate sulfotransferase 8
g37636	chstb	0.535779	3.76737	7.03157	0.0239077	carbohydrate sulfotransferase 11
g7679	chstb	77.9342	21.2898	0.273177	0.000691715	carbohydrate sulfotransferase 11
g2320	chstc	175.413	85.2076	0.485754	0.0121933	carbohydrate sulfotransferase 12
g9410	chstc	5.62396	1.79933	0.319941	0.0450084	carbohydrate sulfotransferase 12
g11189	ci005	330.432	153.09	0.463303	0.00930695	transmembrane protein c9orf5
g21450	ci025	60.5681	21.4624	0.354351	0.000988189	uncharacterized protein c9orf25 homolog
g16048	ci025	52.0898	15.6456	0.300358	0.0230822	uncharacterized protein c9orf25
g37231	ci064	1.49823	6.19598	4.13552	0.0162755	upf0553 protein c9orf64 homolog
g36731	ci072	9.38585	23.2501	2.47715	0.0138853	uncharacterized protein c9orf72
g24418	ci098	4.45241	1.02523	0.230264	0.0422471	adenylate kinase-like protein c9orf98 homolog
g12596	cideb	7.34938	17.05	2.31993	0.0355808	cell death activator cide-b
g11312	ciks	200.662	382.796	1.90766	0.021615	adapter protein ciks
g9076	ciks	125.661	60.3019	0.479879	0.0144842	adapter protein ciks
g10652	cilp1	86.5882	10307.6	119.042	0.00800461	cartilage intermediate layer protein 1 short=cilp-1 contains:
g9910	cilp1	166.143	28.8016	0.173355	4.0127e-05	cartilage intermediate layer protein 1 short=cilp-1
g38951	cing	10.5554	22.3622	2.11856	0.0447331	cingulin
g21541	cinp	225.944	411.29	1.82032	0.0497632	cyclin-dependent kinase 2-interacting protein
g24648	cip2a	10.3967	3.2444	0.31206	0.0309992	protein cip2a
g9355	cip2a	41.0253	11.8579	0.289038	0.0125971	protein cip2a homolog
g28094	cip2a	9.68138	2.52079	0.260375	0.0079817	protein cip2a homolog
g33184	cir1a	8.59368	20.8365	2.42463	0.0214661	cirhin
g1007	cisd1	117.381	53.2971	0.454053	0.0060273	cdgsh iron-sulfur domain-containing protein 1
g2116	cish	63.1146	115.192	1.82512	0.0444962	cytokine-inducible sh2-containing protein short=cis
g946	cite1	198.361	58.7638	0.296248	0.000398606	cbp p300-interacting transactivator 1
g12643	cj078	14.2092	5.2381	0.368642	0.0469277	uncharacterized protein c10orf78
g11868	cj081	43.67	191.063	4.37516	0.000661054	ph domain-containing protein c10orf81 homolog
g16393	cj119	78.8531	43.7756	0.555153	0.0322805	upf0557 protein c10orf119 homolog
g14867	ck010	929.315	1767.47	1.90191	0.0193692	upf0197 transmembrane protein c11orf10 homolog
g16202	ck073	19.8769	51.5459	2.59326	0.00344442	uncharacterized protein c11orf73 homolog
g13498	ck2n2	18.4939	3.51317	0.189964	8.59391e-05	calcium calmodulin-dependent protein kinase ii inhibitor 2
g42321	cklf3	6.59412	18.3376	2.7809	0.0064948	cklf-like marvel transmembrane domain-containing protein 3
g3547	cklf4	406.708	1132.94	2.78563	0.00780226	cklf-like marvel transmembrane domain-containing protein 4
g4264	cklf4	3157.15	1761.37	0.557897	0.038992	cklf-like marvel transmembrane domain-containing protein 4
g5355	cklf8	54.4233	195.704	3.59597	0.0186045	cklf-like marvel transmembrane domain-containing protein 8
g17786	cl026	42.2332	103.384	2.44794	0.00521211	uncharacterized protein c12orf26 homolog
g5228	cl040	3.63656	12.3141	3.38618	0.00653325	uncharacterized protein c12orf40
g45705	cl041	23.8433	47.5035	1.99232	0.0288066	uncharacterized protein c12orf41 homolog
g15238	cl066	351.805	206.822	0.587888	0.0449121	upf0536 protein c12orf66 homolog
g36098	cl17a	4706.96	9611.04	2.04188	0.0219902	c-type lectin domain family member a
g2230	cl19a	5.83305	2.06111	0.35335	0.0471626	c-type lectin domain family 19 member a flags: precursor
g19298	clap1	602.688	316.191	0.524635	0.023191	clip-associating protein 1
g16606	clap1	21.8952	10.0449	0.458771	0.0189982	clip-associating protein 1
g16724	clap2	25.9598	81.8621	3.15341	0.000485177	clip-associating protein 2
g41953	clca	54.7412	203.59	3.71913	2.62591e-05	clathrin light chain a short=lca
g28451	clcn2	12.7024	46.4008	3.65293	0.000167393	chloride channel protein 2 short= -2
g16125	clcn2	1451.22	3000.77	2.06775	0.0121515	chloride channel protein 2 short= -2
g5336	clcn3	575.451	1094.3	1.90165	0.0351098	h(+) cl(-) exchange transporter 3
g2461	clcn7	974.998	502.606	0.515494	0.0153802	h(+) cl(-) exchange transporter 7
g6880	cld1	17.3806	1.11607	0.0642136	0.0286181	claudin-1
g2294	cld14	322.831	0.478422	0.00148196	0.0392407	claudin-14
g11679	cld18	1237.69	4713.16	3.80802	8.26399e-06	claudin-18
g13356	cld22	3292.25	728.893	0.221397	0.000369028	claudin-22
g34689	cld4	1.59728	0	0	0.016285	claudin-4
g14312	cld5	130.745	22.0089	0.168335	0.000996639	claudin-5
g16299	cld7a	2.9107	0.300804	0.103344	0.0374931	claudin-7-a
g42726	clh	4.23556	15.0963	3.56417	0.00375727	clathrin heavy chain 1
g41625	clh	12.4619	39.1287	3.13988	0.00159089	clathrin heavy chain 1
g34528	clh	17.1793	53.3788	3.10715	0.00148645	clathrin heavy chain 1
g41921	clh	19.9745	42.1213	2.10875	0.0337274	clathrin heavy chain 1
g21442	clh	42.9953	22.2309	0.517055	0.0379333	clathrin heavy chain 1
g41970	clh1	20.952	91.1139	4.34871	1.22733e-05	clathrin heavy chain 1
g45388	clh1	20.1671	53.894	2.67238	0.00425898	clathrin heavy chain 1
g43905	clh1	27.7767	70.5775	2.54089	0.0051916	clathrin heavy chain 1
g42200	clh1	34.4012	81.2885	2.36296	0.00881434	clathrin heavy chain 1
g6372	clic2	1383.15	718.298	0.519322	0.0223296	chloride intracellular channel protein 2
g37187	clic4	10.176	32.102	3.15467	0.0016094	chloride intracellular channel protein 4
g41516	clic4	18.1212	55.5404	3.06493	0.0171684	chloride intracellular channel protein 4
g14555	clip1	54.6334	24.8087	0.454094	0.0145937	cap-gly domain-containing linker protein 1
g39143	clk1	84.1376	317.052	3.76826	8.60098e-06	dual specificity protein kinase clk1
g42064	clk1	84.9477	255.906	3.01251	0.000141856	dual specificity protein kinase clk1
g24801	clk1	1768.24	3604.54	2.03849	0.00838961	dual specificity protein kinase clk1
g33557	clk2	7.9873	23.9323	2.9963	0.00350013	dual specificity protein kinase clk2
g4688	clk4	174.365	494.294	2.83482	0.000345579	dual specificity protein kinase clk4
g41071	clk4	221.738	517.828	2.33531	0.00246179	dual specificity protein kinase clk4
g14242	clld6	298.876	133.171	0.445574	0.00343406	chronic lymphocytic leukemia deletion region gene 6 protein short=cll deletion region gene 6 protein
g10064	cln8	11.7422	29.9759	2.55283	0.00770683	protein cln8
g5405	clock	222.17	82.2184	0.37007	0.000676648	circadian locomoter output cycles protein kaput short=hclock
g17261	clpp	466.087	910.945	1.95445	0.0214909	atp-dependent clp protease proteolytic mitochondrial
g15949	clul1	10.6797	4.11519	0.385327	0.0264462	clusterin-like protein 1
g37831	clybl	1.67686	0.109715	0.0654287	0.0446362	citrate lyase subunit beta-like mitochondrial short=citrate lyase beta-like flags: precursor
g16320	cm023	150.305	52.1187	0.346754	0.000336344	uncharacterized protein c13orf23
g196	cmbl	74.6048	268.909	3.60445	0.00692755	carboxymethylenebutenolidase homolog
g36600	cml1	21.1144	64.9009	3.07377	0.000419119	chemokine-like receptor 1
g17525	cmpk2	541.951	59.2506	0.109328	2.49204e-06	ump-cmp kinase mitochondrial flags: precursor
g22786	cmta1	68.1666	7.65377	0.11228	1.15197e-11	calmodulin-binding transcription activator 1
g21725	cmta2	251.851	132.373	0.525601	0.0260957	calmodulin-binding transcription activator 2
g5041	cmya5	59.7121	25.3502	0.424541	0.00675126	cardiomyopathy-associated protein 5
g12063	cmya5	5.49506	0.319867	0.0582098	0.00227598	cardiomyopathy-associated protein 5
g8216	cn037	15.8624	5.63343	0.355143	0.0152314	uncharacterized protein c14orf37 homolog flags: precursor
g12950	cn101	57.7082	160.885	2.78791	0.0172859	upf0679 protein c14orf101 homolog
g16470	cn118	242.784	106.459	0.438492	0.00462036	uncharacterized protein c14orf118 homolog
g30386	cn138	10.663	24.0302	2.2536	0.0258324	uncharacterized protein c14orf138
g2660	cn138	15.669	33.3264	2.1269	0.0300057	uncharacterized protein c14orf138
g43726	cn138	7.97909	2.47521	0.310212	0.0192596	uncharacterized protein c14orf138
g15330	cn159	32.7513	83.8956	2.56159	0.019338	upf0317 protein c14orf159 mitochondrial flags: precursor
g16225	cn37	1098.42	612.046	0.557207	0.0347071	2 -cyclic-nucleotide 3 -phosphodiesterase short=cnp short=cnpase
g39492	cnd1	5.59273	1.62172	0.28997	0.0437409	condensin complex subunit 1
g27258	cnd2	3.16209	0.423387	0.133895	0.0276042	condensin complex subunit 2
g42533	cnd3	1.47513	4.86489	3.29794	0.0284169	condensin complex subunit 3
g17687	cndg2	9.57654	1.90487	0.19891	0.002289	condensin-2 complex subunit g2
g39198	cndp2	36.5689	79.4283	2.17202	0.0122578	cytosolic non-specific dipeptidase
g3822	cng1	8.86095	2.62405	0.296136	0.00896312	cyclic nucleotide-gated channel cone photoreceptor subunit alpha
g10035	cng1	2.52099	0.359806	0.142724	0.029528	cyclic nucleotide-gated channel cone photoreceptor subunit alpha
g2605	cnkr2	245.517	461.287	1.87884	0.0408325	connector enhancer of kinase suppressor of ras 2 short=connector enhancer of ksr 2
g42366	cnn1	238.467	89.3655	0.37475	0.0179453	calponin-1
g16846	cnn1	564.234	194.431	0.344593	0.00310408	calponin-1
g31408	cnn1	205.67	56.3467	0.273967	0.000499006	calponin-1
g8759	cnnm2	297.099	616.264	2.07427	0.0349363	metal transporter cnnm2
g36596	cnot1	26.2171	78.0116	2.97559	0.00116747	ccr4-not transcription complex subunit 1
g41166	cnot1	9.08214	22.3893	2.4652	0.016654	ccr4-not transcription complex subunit 1
g33881	cnot1	9.54596	21.6247	2.26532	0.0304214	ccr4-not transcription complex subunit 1
g37442	cnot1	24.144	53.2245	2.20446	0.0189842	ccr4-not transcription complex subunit 1
g28417	cnot2	6.89636	2.34955	0.340695	0.0436441	ccr4-not transcription complex subunit 2
g5525	cnot3	215.572	121.37	0.563013	0.0493186	ccr4-not transcription complex subunit 3
g8238	cnot3	79.2229	32.025	0.404239	0.00299964	ccr4-not transcription complex subunit 3
g28930	cnot6	7.32438	18.0731	2.46752	0.025726	ccr4-not transcription complex subunit 6
g6694	cnota	207.527	433.347	2.08814	0.0134797	ccr4-not transcription complex subunit 10
g23905	cnpy3	181.949	72.5796	0.3989	0.0027475	protein canopy homolog 3
g1655	cnst	2731.01	589.291	0.215778	0.00047758	consortin
g14139	cntf	38.1796	15.3561	0.402208	0.0260294	ciliary neurotrophic factor short=cntf
g22617	cntn2	37.1549	15.2553	0.410587	0.0498733	contactin-2
g25460	cntn5	0	9.10678	Inf	0.0281293	contactin-5 flags: precursor
g3940	cntp5	1.25085	0	0	0.0423389	contactin-associated 5
g2067	cntrb	268.581	145.99	0.543562	0.0380774	centrobin
g14195	co017	499.824	257.804	0.51579	0.0236446	uncharacterized protein c15orf17
g3427	co052	28.3102	8.36907	0.29562	0.000925992	uncharacterized protein c15orf52 homolog
g11158	co4	147.583	464.706	3.14878	0.0187697	complement c4 contains:
g936	co4a1	201.079	757.93	3.76932	5.52464e-06	collagen alpha-1 chain contains:
g12003	co4a2	638.96	294.243	0.460503	0.0119504	collagen alpha-2 chain contains:
g19822	co5a1	15.1191	1.64352	0.108705	0.000222594	collagen alpha-1 chain flags: precursor
g12588	co6a1	48.7232	21.09	0.432853	0.017923	collagen alpha-1 chain flags: precursor
g7207	co6a3	5934.84	2630.75	0.443272	0.00742458	collagen alpha-3 chain flags: precursor
g6412	co6a3	622.329	226.75	0.364357	0.000879915	collagen alpha-3 chain flags: precursor
g23111	co6a6	3.39221	0.691845	0.203951	0.0363635	collagen alpha-6 chain flags: precursor
g43465	co7	7.41114	17.7757	2.39851	0.0400062	complement component c7 flags: precursor
g4365	co7a1	5.22547	29.4544	5.63669	0.0168875	collagen alpha-1 chain
g3780	co9a1	0.51758	6.34453	12.2581	0.0154233	collagen alpha-1 chain flags: precursor
g1020	co9a3	461.681	2707.99	5.86549	6.97358e-07	collagen alpha-3 chain flags: precursor
g801	coca1	2831.16	1383.33	0.48861	0.0299199	collagen alpha-1 chain flags: precursor
g5692	coe1	8.26361	69.4716	8.40693	2.44685e-09	transcription factor coe1 short=o e-1 short=oe-1
g9780	coea1	15.6353	6.13192	0.392185	0.0396663	collagen alpha-1 chain
g27733	cof1	1757.48	3351.4	1.90694	0.0254261	cofilin-1
g27106	cof1	339.787	184.218	0.542158	0.0255114	cofilin-1
g11642	cof2	9.93059	391.77	39.4508	0.0486167	cofilin-2
g37888	cofa1	0.363224	19.6571	54.1185	4.87537e-06	collagen alpha-1 chain contains:
g27703	cog5	1.75741	6.67065	3.79572	0.0183097	conserved oligomeric golgi complex subunit 5 short=cog complex subunit 5
g4678	comd4	78.9095	154.59	1.95909	0.027058	comm domain-containing protein 4
g34652	copa	14.6881	46.1876	3.14456	0.000938703	coatomer subunit alpha
g37783	copb	17.5118	69.2176	3.95262	5.85871e-05	coatomer subunit beta
g42838	copb	19.2669	71.3665	3.7041	0.000100161	coatomer subunit beta
g45898	copb	7.64386	19.0325	2.4899	0.0287025	coatomer subunit beta
g45657	copb2	33.5333	153.5	4.57754	3.64233e-06	coatomer subunit beta
g7157	copb2	1366.58	2794.72	2.04506	0.0196659	coatomer subunit beta
g40131	copg2	55.7249	158.535	2.84495	0.000813948	coatomer subunit gamma-2
g22701	copia	10.8663	0.21809	0.0200703	7.0264e-09	copia protein
g26212	cor1c	26.8005	85.1365	3.17668	0.000291879	coronin-1c
g39703	cor1c	14.8811	38.7414	2.60339	0.00566437	coronin-1c
g12166	cor2b	402.681	142.479	0.353827	0.0338157	coronin-2b
g15480	cor2b	3.38225	0.607603	0.179645	0.0361329	coronin-2b
g20673	corin	21.7049	8.11151	0.373718	0.0107378	atrial natriuretic peptide-converting enzyme
g42102	corin	8.63454	2.19257	0.25393	0.00754577	atrial natriuretic peptide-converting enzyme
g9481	cox15	293.36	159.516	0.543753	0.0404657	cytochrome c oxidase assembly protein cox15 homolog
g10112	cox16	45.2829	14.3252	0.316349	0.000570947	cytochrome c oxidase assembly protein cox16 mitochondrial flags: precursor
g2322	cox42	238.792	1071.95	4.48905	3.51204e-07	cytochrome c oxidase subunit 4 isoform mitochondrial
g21757	cox7b	3345.25	7906.45	2.36348	0.00340166	cytochrome c oxidase subunit mitochondrial
g14853	cox8b	1030.82	2334.69	2.26488	0.00379606	cytochrome c oxidase subunit mitochondrial
g22995	cp17a	117.521	60.7855	0.517229	0.0238251	steroid 17-alpha-hydroxylase lyase
g10692	cp17a	19.982	5.64694	0.282602	0.00230655	steroid 17-alpha-hydroxylase lyase
g9348	cp19a	2.16542	0	0	0.0102963	cytochrome p450 19a1
g2845	cp1b1	441.317	216.125	0.489727	0.0220427	cytochrome p450 1b1
g8373	cp26b	142.553	29.2003	0.204838	0.00312406	cytochrome p450 26b1 short=cyp26b1
g23728	cp26b	24.0606	2.69635	0.112065	0.000646585	cytochrome p450 26b1 short=cyp26b1
g12770	cp27a	641.76	314.044	0.489348	0.041003	sterol 26- mitochondrial
g31223	cp2dq	0.361626	28.1619	77.8759	0.0329414	cytochrome p450 2d26
g39625	cp2k1	0.172527	4.30777	24.9687	0.00624625	cytochrome p450 2k1
g38162	cp2k1	99.8917	380.051	3.80463	0.0137009	cytochrome p450 2k1
g42210	cp2k3	30.0767	196.909	6.54689	0.00179707	cytochrome p450 2k3
g26045	cp2m1	1.32886	19.1689	14.4251	4.67169e-05	cytochrome p450 2m1
g4179	cp2u1	16.525	0.640355	0.0387508	4.32029e-10	cytochrome p450 2u1
g42905	cp46a	177.665	427.903	2.40848	0.00744164	cholesterol 24-hydroxylase short=ch24h
g34354	cp46a	349.981	785.653	2.24485	0.00852797	cholesterol 24-hydroxylase short=ch24h
g12486	cp4v2	18.9668	1.47764	0.0779064	1.94611e-08	cytochrome p450 4v2
g24463	cpeb2	208.232	121.293	0.582489	0.0381227	cytoplasmic polyadenylation element-binding protein 2 short=cpe-bp2 short=cpe-binding protein 2 short=hcpeb-2
g41855	cpeb4	5.43878	13.2639	2.43877	0.0401885	cytoplasmic polyadenylation element-binding protein 4 short=cpe-bp4 short=cpe-binding protein 4 short=hcpeb-4
g26180	cpin1	76.3864	212.552	2.78259	0.000724907	anamorsin
g38448	cpne8	0	3.82396	Inf	0.000611599	copine-8
g9882	cpne9	7.62946	1.31228	0.172001	0.00488715	copine-9
g4217	cpns1	6950.62	12953.9	1.86371	0.0272526	calpain small subunit 1 short=css1
g4806	cpped	255.894	133.321	0.521003	0.0310128	calcineurin-like phosphoesterase domain-containing protein 1
g39064	cpsf1	9.62667	19.7504	2.05163	0.0299026	cleavage and polyadenylation specificity factor subunit 1
g35404	cpsf2	27.7807	83.9535	3.02201	0.00049112	cleavage and polyadenylation specificity factor subunit 2
g15161	cpsf5	288.36	656.163	2.2755	0.00520808	cleavage and polyadenylation specificity factor subunit 5
g10175	cq063	97.7965	39.4739	0.403633	0.00171282	uncharacterized protein c17orf63
g8909	cq076	103.153	45.9452	0.44541	0.00995063	leucine-rich repeat-containing protein c17orf76
g6061	cq076	13.077	5.56635	0.425659	0.0316087	leucine-rich repeat-containing protein c17orf76
g13172	cr001	245.968	122.357	0.497451	0.0270284	uncharacterized protein c18orf1
g36151	cr025	13.1374	27.5779	2.0992	0.0482856	uncharacterized protein c18orf25
g1474	cr3l1	111.931	29.3598	0.262302	5.36139e-05	cyclic amp-responsive element-binding protein 3-like protein 1 short=camp-responsive element-binding protein 3-like protein 1
g26312	cr3l3	167.634	726.705	4.33507	0.0143419	cyclic amp-responsive element-binding protein 3-like protein 3 short=camp-responsive element-binding protein 3-like protein 3
g26347	crac1	18.8306	144.791	7.68914	0.000921496	cartilage acidic protein 1
g24354	crac1	34.8598	134.325	3.85329	0.0148592	cartilage acidic protein 1
g43360	crbl2	15.7333	38.619	2.45461	0.00905882	camp-responsive element-binding 2
g17234	crcm	156.551	58.7624	0.375356	0.00146915	colorectal mutant cancer protein short=protein mcc
g10365	crcm1	19.0921	9.57264	0.501393	0.04557	calcium release-activated calcium channel protein 1
g19770	creb5	38.3814	99.9147	2.60321	0.00591912	cyclic amp-responsive element-binding protein 5 short=creb-5 short=camp-responsive element-binding protein 5
g621	crel1	142.242	72.3529	0.50866	0.0294089	cysteine-rich with egf-like domain protein 1 flags: precursor
g17023	crest	145.401	320.159	2.2019	0.00686641	calcium-responsive transactivator
g10756	crgna	2.39135	0.352659	0.147473	0.0364324	gamma-crystallin n-a
g38721	crip2	17.5512	124.286	7.0813	0.000283169	cysteine-rich protein 2 short=crp-2
g16152	crip2	66.6284	207.685	3.11707	0.00267694	cysteine-rich protein 2 short=crp-2
g15837	crip2	120.468	29.6779	0.246355	0.0152471	cysteine-rich protein 2 short=crp-2
g18136	cris	3.68977	0.431999	0.11708	0.00858714	serotriflin
g17319	crkl	370.068	184.288	0.497983	0.0122296	crk-like protein
g31319	crlf1	9.8556	47.7978	4.84981	0.0481069	cytokine receptor-like factor 1
g12462	crml	199.138	80.6817	0.405156	0.00234432	protein cramped-like
g18297	crns1	3.25042	0.5375	0.165363	0.038103	carnosine synthase 1
g23640	crocc	151.75	66.683	0.439428	0.0108647	rootletin
g1052	crtc2	549.637	236.085	0.429528	0.00429902	creb-regulated transcription coactivator 2
g3804	crtc3	670.519	363.079	0.54149	0.0351911	creb-regulated transcription coactivator 3
g21239	cry1	80.8379	343.14	4.24479	1.57612e-06	cryptochrome-1
g32330	cry1	5.15654	20.185	3.91445	0.000997799	cryptochrome-1
g30489	cry1	11.0224	34.6984	3.14798	0.00120513	cryptochrome-1
g37381	cry1	5.69533	17.112	3.00456	0.00594999	cryptochrome-1
g15717	cry1	22.8689	65.2298	2.85233	0.0014841	cryptochrome-1
g38842	cry1	23.8925	60.464	2.53067	0.00525547	cryptochrome-1
g43883	cry1	14.3028	33.5108	2.34295	0.0148574	cryptochrome-1
g40649	cry1	29.1606	63.4244	2.17501	0.0137904	cryptochrome-1
g4258	cryl1	204.177	68.4092	0.335048	0.000211273	lambda-crystallin
g37100	cs029	6.08105	17.2163	2.83113	0.0130147	uncharacterized protein c19orf29 homolog
g42907	cs052	8.95307	32.8977	3.67446	0.00060289	uncharacterized protein c19orf52
g10701	cs056	418.945	882.587	2.10669	0.0098863	upf0139 membrane protein c19orf56 homolog
g42032	csde1	27.5938	248.241	8.99624	3.19957e-11	cold shock domain-containing protein e1
g38904	csde1	47.1846	226.068	4.79114	6.27773e-07	cold shock domain-containing protein e1
g44858	csde1	45.145	167.154	3.70259	2.87358e-05	cold shock domain-containing protein e1
g45586	csde1	59.1281	186.337	3.15142	0.00025073	cold shock domain-containing protein e1
g31920	csde1	385.491	825.626	2.14175	0.0100988	cold shock domain-containing protein e1
g27007	csde1	355.382	748.165	2.10524	0.012	cold shock domain-containing protein e1
g40463	csde1	55.7689	116.703	2.09261	0.0221727	cold shock domain-containing protein e1
g14851	csga	30.1738	185.725	6.15519	3.78598e-08	c-factor
g45944	csk21	16.9074	138.341	8.18227	5.61685e-10	casein kinase ii subunit alpha short=ck ii alpha
g8498	csk21	70.275	535.631	7.62193	1.87937e-10	casein kinase ii subunit alpha short=ck ii alpha
g45057	csk21	17.4874	113.821	6.50878	3.34747e-08	casein kinase ii subunit alpha short=ck ii
g28604	csk21	237.398	544.52	2.2937	0.00557484	casein kinase ii subunit alpha short=ck ii
g20195	csk22	466.617	906.496	1.9427	0.0296216	casein kinase ii subunit alpha short=ck ii
g37997	csk2b	15.9694	32.0091	2.0044	0.0467274	casein kinase ii subunit beta short=ck ii beta
g2930	cski1	89.2994	34.1959	0.382936	0.0100964	caskin-1
g40359	cskp	9.72474	28.1199	2.89159	0.00425263	peripheral plasma membrane protein cask
g8434	cskp	122.289	67.5786	0.552613	0.0342832	peripheral plasma membrane protein cask short=hcask
g36269	csn3	14.141	41.6332	2.94416	0.00317282	cop9 signalosome complex subunit 3 short=signalosome subunit 3
g29582	csn7a	97.3048	305.325	3.13782	0.000179388	cop9 signalosome complex subunit 7a short=sgn7a short=signalosome subunit 7a
g25868	csn7b	184.192	345.428	1.87537	0.0355658	cop9 signalosome complex subunit 7b short=sgn7b short=signalosome subunit 7b
g10856	csp	487.35	165.354	0.339292	0.00845922	cysteine string protein short=csp
g27567	csp	25.568	7.36876	0.288203	0.0041444	circumsporozoite protein short=cs flags: precursor
g4273	cspg5	23.636	7.08918	0.299932	0.0013279	chondroitin sulfate proteoglycan 5
g15841	csrn2	50.3307	22.2158	0.441398	0.0173005	cysteine serine-rich nuclear protein 2 short=csrnp-2
g19210	csrn3	10.6117	3.53163	0.332807	0.0100828	cysteine serine-rich nuclear protein 3 short=csrnp-3
g2878	csrn3	66.8066	15.1217	0.226351	0.000356349	cysteine serine-rich nuclear protein 3 short=csrnp-3
g35032	cstf1	17.5448	45.9294	2.61783	0.00413698	cleavage stimulation factor subunit 1
g6638	cstf2	134.294	281.334	2.09491	0.0118005	cleavage stimulation factor subunit 2
g41077	cstf2	22.5652	9.73707	0.431508	0.0164801	cleavage stimulation factor subunit 2
g6139	cstf3	19.0948	8.91638	0.466953	0.0317181	cleavage stimulation factor subunit 3
g17130	cstf3	33.6088	10.7359	0.319438	0.000915575	cleavage stimulation factor subunit 3
g5196	cstn1	1158.79	619.765	0.534838	0.0208769	calsyntenin-1
g16667	csup	585.54	219.039	0.374081	0.000671233	protein catecholamines up
g17341	ct007	26.2578	12.6085	0.480182	0.023934	probable methyltransferase c20orf7 mitochondrial flags: precursor
g29018	ct043	31.9025	78.5407	2.46189	0.00438617	upf0549 protein c20orf43 homolog
g41228	ct043	33.697	79.8641	2.37007	0.00555882	upf0549 protein c20orf43 homolog
g9952	ct117	252.639	109.63	0.433941	0.00552368	uncharacterized protein c20orf117
g9433	ct123	1.69185	0	0	0.0151361	transmembrane protein c20orf123 homolog
g14010	ctbp1	475.647	227.364	0.478011	0.0100972	c-terminal-binding protein 1 short= 1
g37359	ctbp2	6.36827	14.4704	2.27226	0.0255811	c-terminal-binding protein 2 short= 2
g34455	ctcf	13.6658	47.0774	3.4449	0.00469445	transcriptional repressor ctcf
g34066	ctcf	19.2017	65.0836	3.38947	0.000886794	transcriptional repressor ctcf
g36910	ctcf	21.7718	57.3323	2.63333	0.0043245	transcriptional repressor ctcf
g31711	ctcf	11.7437	26.7538	2.27814	0.0296949	transcriptional repressor ctcf
g25884	ctds1	492.263	264.411	0.537133	0.022453	carboxy-terminal domain rna polymerase ii polypeptide a small phosphatase 1
g37308	ctds2	15.508	36.5476	2.35669	0.0143141	carboxy-terminal domain rna polymerase ii polypeptide a small phosphatase 2
g2023	ctdsl	177.044	96.4227	0.544627	0.0421069	ctd small phosphatase-like protein short=ctdsp-like
g2933	ctf18	16.318	6.07179	0.372091	0.0344967	chromosome transmission fidelity protein 18 homolog short=hctf18
g25896	ctl1	179.991	93.0346	0.516885	0.0253583	choline transporter-like protein 1
g4769	ctl1	460.115	182.27	0.39614	0.00135821	choline transporter-like protein 1
g26426	ctl2	17.5429	81.1958	4.62842	5.91485e-05	choline transporter-like protein 2
g16777	ctl2	45.0843	114.544	2.54067	0.00399852	choline transporter-like protein 2
g38109	ctl2	23.7393	56.8175	2.3934	0.0065106	choline transporter-like protein 2
g9711	ctl2a	314.461	170.019	0.540669	0.0344645	ctd small phosphatase-like protein 2-a short=ctdsp-like 2-a
g3214	ctna1	919.853	466.77	0.507439	0.0232493	catenin alpha-1
g5991	ctna1	77.935	23.1745	0.297357	0.000108664	catenin alpha-1
g37343	ctnb1	152.181	404.981	2.66118	0.000900412	catenin beta-1
g35160	ctnd1	9.73756	25.495	2.61822	0.00857735	catenin delta-1
g191	ctnd2	4.80417	0.930741	0.193736	0.0120238	catenin delta-2
g1849	ctns	229.027	130.636	0.570394	0.0447964	cystinosin
g1772	ctr1	989.485	440.788	0.445472	0.00724573	high affinity cationic amino acid transporter 1 short=cat-1 short=cat1
g12240	ctr3	26.5526	90.5484	3.41015	0.0309493	cationic amino acid transporter 3 short=cat-3 short=cat3
g10761	ctr4	64.1561	23.4511	0.365532	0.00653822	cationic amino acid transporter 4 short=cat-4 short=cat4
g45076	ctr9	43.0339	86.8664	2.01856	0.0252828	rna polymerase-associated protein ctr9 homolog
g30929	cttb2	82.6601	21.3294	0.258038	0.0140094	cortactin-binding protein 2 short= 2
g13886	cttb2	18.3743	1.39436	0.0758861	0.00945438	cortactin-binding protein 2 short= 2
g45595	ctu1	0.701958	3.93191	5.60134	0.0262204	cytoplasmic trna 2-thiolation protein 1
g21867	cu059	78.562	148.294	1.88761	0.0340689	uncharacterized protein c21orf59 homolog
g37722	cued1	9.33638	2.57104	0.275378	0.00373143	cue domain-containing protein 1
g33766	cul3	13.0755	29.192	2.23257	0.0328337	cullin-3 short=cul-3
g41701	cul3	15.5741	34.0785	2.18816	0.0289814	cullin-3 short=cul-3
g41218	cul3b	13.4337	58.6362	4.36485	3.18127e-05	cullin-3-b short=cul-3-b
g725	cuta	138.408	68.0284	0.491508	0.0150791	protein homolog flags: precursor
g17858	cv030	124.493	70.5494	0.566696	0.0412511	uncharacterized protein c22orf30
g11411	cv040	42.7573	104.378	2.44118	0.00372062	upf0595 protein c22orf40 homolog
g17965	cwc27	41.7492	80.5658	1.92976	0.0322453	peptidyl-prolyl cis-trans isomerase cwc27 homolog short=ppiase cwc27
g13913	cx036	0.538931	4.55948	8.46023	0.00625349	upf0672 protein cxorf36 flags: precursor
g41282	cx038	11.5977	25.2209	2.17465	0.0338018	uncharacterized protein cxorf38 homolog
g12138	cx038	711.116	118.633	0.166826	6.57071e-06	uncharacterized protein cxorf38
g4068	cx041	23.6438	11.6425	0.492412	0.0369851	uncharacterized protein cxorf41
g1994	cxa1	489.263	221.219	0.452147	0.00405726	gap junction alpha-1 protein
g45232	cxar	6.00298	26.8234	4.46835	0.000109235	coxsackievirus and adenovirus receptor homolog short=coxsackie virus and adenovirus receptor
g38694	cxar	9.36396	23.9881	2.56175	0.0165391	coxsackievirus and adenovirus receptor homolog short=car flags: precursor
g24566	cxar	1.95753	0.197239	0.100759	0.0432404	coxsackievirus and adenovirus receptor homolog short=car flags: precursor
g36455	cxb3	170.357	414.72	2.43442	0.00308307	gap junction beta-3 protein
g20719	cxb4	8.90098	39.9975	4.4936	4.32454e-05	gap junction beta-4 protein
g17396	cxb4	375.785	1166.62	3.10448	0.0002065	gap junction beta-4 protein
g4440	cxb6	8.6411	34.1297	3.9497	0.0255176	gap junction beta-6 protein
g7210	cxcr7	285.936	74.6258	0.260987	7.98059e-06	c-x-c chemokine receptor type 7 short=cxc-r7 short=cxcr-7
g42141	cxd2	2.89734	0.521117	0.17986	0.0373361	gap junction delta-2 protein
g26961	cxxc1	39.7505	73.5248	1.84966	0.0491934	-binding protein
g24160	cxxc5	2.66656	15.0658	5.64989	0.000198298	cxxc-type zinc finger protein 5
g17465	cy24a	1958.81	394.013	0.20115	0.0450434	cytochrome b-245 light chain
g24212	cyc	5.56653	16.6795	2.99639	0.0125451	cytochrome c
g38365	cyfp2	1.06332	17.9951	16.9235	6.05529e-08	cytoplasmic fmr1-interacting protein 2
g35152	cyfp2	1.24901	7.04807	5.6429	0.00395494	cytoplasmic fmr1-interacting protein 2
g23588	cyfp2	58.1527	18.2485	0.313804	0.0157128	cytoplasmic fmr1-interacting protein 2
g41117	cygb	29.2012	103.061	3.52934	0.000592594	cytoglobin
g13293	cyh2	214.539	88.3326	0.411733	0.0300422	cytohesin-2
g43506	cysp1	376.784	1029.79	2.73311	0.000575319	digestive cysteine proteinase 1 flags: precursor
g10829	cyt	884.22	2110.75	2.38713	0.00429767	cystatin
g17841	cyt	4650.73	896.445	0.192754	0.00875199	cystatin flags: precursor
g6621	cytsa	618.277	258.479	0.418063	0.041108	cytospin-a
g15026	cytsb	88.2656	36.9245	0.418334	0.00672144	cytospin-b
g44676	cytsb	25.7892	7.09341	0.275053	0.000212633	cytospin-b
g19004	d11l8	7.59623	2.18343	0.287436	0.0079598	atp-dependent rna helicase ddx11-like protein 8
g10943	d19l1	45.969	15.622	0.339838	0.00407	protein dpy-19 homolog 1
g10944	d19l1	307.775	95.3854	0.309919	0.000106473	protein dpy-19 homolog 1
g12352	dab2	289.231	132.571	0.458357	0.00926587	disabled homolog 2
g6629	dab2	112.454	29.1233	0.25898	0.00602259	disabled homolog 2
g34393	dab2p	25.7531	65.0696	2.52667	0.00414396	disabled homolog 2-interacting protein short=dab2 interaction protein short=dab2-interacting protein
g2806	dach1	128.57	32.5579	0.253231	0.00243134	dachshund homolog 1 short=dach1
g13289	dach2	32.6178	15.618	0.478818	0.0323585	dachshund homolog 2 short=dach2
g24426	dad1	341.277	892.375	2.61481	0.00122907	dolichyl-diphosphooligosaccharide--protein glycosyltransferase subunit dad1 short=oligosaccharyl transferase subunit dad1
g1522	dapk1	1783.95	3811.7	2.13667	0.00976797	death-associated protein kinase 1 short=dap kinase 1
g15104	dapk1	1146.38	661.905	0.577388	0.0425907	death-associated protein kinase 1 short=dap kinase 1
g4814	dapk2	338.496	159.101	0.470022	0.0115312	death-associated protein kinase 2 short=dap kinase 2
g1349	dapk3	17.6696	7.82434	0.442813	0.0409594	death-associated protein kinase 3 short=dap kinase 3
g5696	dazp2	10258	5036.96	0.491027	0.012453	daz-associated protein 2
g4230	dbf4a	67.366	17.7828	0.263973	3.32966e-05	protein dbf4 homolog a
g5665	dbf4b	28.8057	5.5156	0.191476	0.0240064	protein dbf4 homolog b
g33466	dbr1	6.8727	16.7816	2.44178	0.031883	lariat debranching enzyme
g18375	dc1i2	42.742	189.99	4.44504	2.52606e-06	cytoplasmic dynein 1 intermediate chain 2
g3224	dc1l1	113.463	58.2922	0.513755	0.0370168	cytoplasmic dynein 1 light intermediate chain 1
g30369	dca11	13.3652	30.4538	2.27859	0.0174006	ddb1- and cul4-associated factor 11
g42257	dcaf7	19.6118	53.1108	2.70811	0.003327	ddb1- and cul4-associated factor 7
g35625	dcaf8	25.8763	81.6499	3.1554	0.000577279	ddb1- and cul4-associated factor 8
g11653	dcam	1346.61	685.978	0.50941	0.0108507	s-adenosylmethionine decarboxylase proenzyme short= etdc short=samdc contains:
g15819	dcbd2	829.82	366.226	0.441332	0.00474216	cub and lccl domain-containing protein 2
g23323	dclk1	2.11875	0	0	0.00401799	serine threonine-protein kinase dclk1
g39761	dcnl3	22.63	0.64058	0.0283067	3.12455e-08	dcn1-like protein 3
g4615	dcnl5	155.829	693.929	4.45315	8.17173e-07	dcn1-like protein 5
g33128	dcor	10.2411	72.2035	7.0504	9.79424e-07	ornithine decarboxylase short=odc
g34500	dcor	15.5153	49.0157	3.15918	0.00168494	ornithine decarboxylase short=odc
g609	dcp1a	199.872	112.964	0.565183	0.033843	mrna-decapping enzyme 1a
g5622	dcp1b	287.987	106.097	0.368409	0.000583832	mrna-decapping enzyme 1b
g16998	dcp2	59.275	28.8009	0.485886	0.014365	mrna-decapping enzyme 2 short=hdpc
g16997	dcp2	933.289	323.338	0.34645	0.000143265	mrna-decapping enzyme 2
g11870	dcr1a	13.3454	4.88942	0.366374	0.01559	dna cross-link repair 1a protein
g662	dcr1c	134.867	75.5818	0.560419	0.0471393	protein artemis
g33031	dctn1	11.5093	26.8264	2.33084	0.0231113	dynactin subunit 1
g26927	dctn2	126.031	249.325	1.97829	0.0245083	dynactin subunit 2
g26783	dctn2	369.331	673.606	1.82385	0.0378095	dynactin subunit 2
g39904	dcup	7.61176	29.9727	3.93768	0.000400175	uroporphyrinogen decarboxylase short=upd short=uro-d
g1169	dcxr	36.3064	192.771	5.30958	7.04396e-08	l-xylulose reductase short=xr
g37287	dd19a	33.7663	118.288	3.50313	8.66225e-05	atp-dependent rna helicase ddx19a
g30036	ddb1	29.4879	115.146	3.90487	2.70196e-05	dna damage-binding protein 1
g29820	ddb1	31.9005	95.2396	2.98552	0.000719159	dna damage-binding protein 1
g32151	ddb1	25.2501	69.7883	2.76388	0.00258343	dna damage-binding protein 1
g29857	ddb1	56.41	119.723	2.12238	0.0169196	dna damage-binding protein 1
g1467	ddb2	338.807	797.009	2.3524	0.00361766	dna damage-binding protein 2
g28093	ddhd1	53.988	30.0793	0.557148	0.0351481	phospholipase ddhd1
g3660	ddr2	99.4273	44.9558	0.452148	0.00619981	discoidin domain-containing receptor 2 short=discoidin domain receptor 2
g13630	ddt4l	713.527	188.142	0.263679	0.00446471	dna damage-inducible transcript 4-like protein
g19452	ddx1	3.50121	54.75	15.6375	3.01989e-12	atp-dependent rna helicase ddx1
g19451	ddx1	71.3739	385.915	5.40695	8.61515e-08	atp-dependent rna helicase ddx1
g31094	ddx1	18.916	47.5885	2.51579	0.00498043	atp-dependent rna helicase ddx1
g43491	ddx1	26.9755	55.2452	2.04798	0.03701	atp-dependent rna helicase ddx1
g28301	ddx11	23.2711	3.66718	0.157585	1.91265e-06	probable atp-dependent rna helicase ddx11
g31002	ddx12	3.17279	0.637406	0.200898	0.0320261	probable atp-dependent rna helicase ddx12
g5053	ddx23	692.743	1402.35	2.02435	0.0170241	probable atp-dependent rna helicase ddx23
g31712	ddx31	15.9242	7.3581	0.46207	0.049157	probable atp-dependent rna helicase ddx31
g39530	ddx39	22.0742	70.4282	3.19052	0.00240707	atp-dependent rna helicase ddx39
g39412	ddx39	31.4306	83.3018	2.65034	0.0160787	atp-dependent rna helicase ddx39
g34169	ddx39	75.7121	192.104	2.53729	0.00682011	atp-dependent rna helicase ddx39
g34781	ddx39	112.174	235.798	2.10207	0.0291566	atp-dependent rna helicase ddx39
g27265	ddx39	173.237	86.2338	0.49778	0.0149585	atp-dependent rna helicase ddx39
g16163	ddx47	86.9352	408.693	4.70112	6.64539e-07	probable atp-dependent rna helicase ddx47
g36985	ddx52	2.1256	9.99759	4.70342	0.00431641	probable atp-dependent rna helicase ddx52
g37603	ddx54	6.67572	20.1009	3.01104	0.0062511	atp-dependent rna helicase ddx54
g38218	ddx58	219.663	45.0054	0.204884	0.000364105	probable atp-dependent rna helicase ddx58
g11629	ddx58	1814.54	186.187	0.102608	5.50009e-06	probable atp-dependent rna helicase ddx58
g4496	ddx58	3975.66	182.371	0.045872	3.02155e-07	probable atp-dependent rna helicase ddx58
g41280	ddx6	6.48897	35.9927	5.54674	0.000202641	probable atp-dependent rna helicase ddx6
g40622	ddx6	4.26752	15.2068	3.56339	0.00493641	probable atp-dependent rna helicase ddx6
g22340	ddx6	45.7728	89.4821	1.95492	0.029701	probable atp-dependent rna helicase ddx6
g41661	decr	6.25604	27.0117	4.31771	9.54737e-05	-dienoyl- mitochondrial
g6613	decr	137.307	248.967	1.81321	0.0254316	-dienoyl- mitochondrial
g37518	def	2.94832	11.1269	3.77397	0.00720153	digestive organ expansion factor homolog
g39431	dem1	24.6465	46.3442	1.88036	0.0395695	defects in morphology protein 1 homolog
g1053	den4b	664.831	222.286	0.33435	0.000251896	denn domain-containing protein 4b
g16416	den5a	582.359	275.79	0.473573	0.0103662	denn domain-containing protein 5a
g13417	dend3	615.016	263.936	0.429154	0.00986421	denn domain-containing protein 3
g11027	denr	139.632	358.025	2.56406	0.00152123	density-regulated protein short=drp
g35507	deoc	28.505	72.0921	2.52911	0.00347136	deoxyribose-phosphate aldolase
g11606	depd5	36.3396	97.1696	2.67393	0.000875989	dep domain-containing protein 5
g3019	depd6	256.189	61.3956	0.23965	3.06456e-06	dep domain-containing mtor-interacting protein short=deptor
g343	depd7	47.5871	12.715	0.267194	0.000157722	dep domain-containing protein 7
g40868	derl1	3.51674	23.8349	6.77755	6.89064e-06	derlin-1
g35907	desm	0	38.0031	Inf	5.90427e-10	desmin
g18044	desm	255.148	16.2471	0.0636773	0.00379104	desmin
g35129	desm	8.45398	0.420971	0.0497956	0.011634	desmin
g17917	dgat1	678.867	267.436	0.393944	0.00109578	diacylglycerol o-acyltransferase 1
g10358	dgc14	14.754	36.4239	2.46875	0.0137774	protein dgcr14
g21288	dgcr8	586.475	312.33	0.532554	0.0158199	microprocessor complex subunit dgcr8
g1932	dgkd	5.98402	1.89107	0.316021	0.038587	diacylglycerol kinase delta short=dag kinase delta
g27477	dgke	255.433	133.122	0.521161	0.0348348	diacylglycerol kinase epsilon short=dag kinase epsilon
g8552	dgkq	174.496	76.5984	0.438969	0.00725768	diacylglycerol kinase theta short=dag kinase theta
g22227	dgkq	15.4826	5.0935	0.328983	0.00782353	diacylglycerol kinase theta short=dag kinase theta
g1472	dgkz	436.958	172.962	0.395832	0.00241174	diacylglycerol kinase zeta short=dag kinase zeta
g14869	dgla	347.21	149.466	0.430476	0.00655586	sn1-specific diacylglycerol lipase alpha short=dgl-alpha
g15012	dgla	26.133	6.96905	0.266676	0.000295592	sn1-specific diacylglycerol lipase alpha short=dgl-alpha
g28059	dh12a	6.18186	45.5322	7.36546	0.00016998	estradiol 17-beta-dehydrogenase 12-a
g25291	dhb8	16.8881	44.5994	2.64087	0.00395837	estradiol 17-beta-dehydrogenase 8
g8619	dhdh	212.988	452.321	2.12369	0.00895777	trans- -dihydrobenzene- -diol dehydrogenase
g28319	dhh1	58.3154	141.349	2.42387	0.00511291	atp-dependent rna helicase dhh1
g19374	dhi1l	7.04983	17.8781	2.53597	0.027059	hydroxysteroid 11-beta-dehydrogenase 1-like protein
g12369	dhi2	614.856	1761.66	2.86517	0.000467282	corticosteroid 11-beta-dehydrogenase isozyme 2
g4429	dhr12	723.069	1679.15	2.32225	0.0227087	dehydrogenase reductase sdr family member 12
g10669	dhrs7	121.243	209.538	1.72824	0.0484291	dehydrogenase reductase sdr family member 7
g34896	dhsb	21.2042	205.364	9.68509	3.65949e-10	succinate dehydrogenase iron-sulfur mitochondrial
g15342	dhsb	704.499	1418.06	2.01286	0.0181938	succinate dehydrogenase iron-sulfur mitochondrial
g43691	dhtk1	3.25516	9.33951	2.86914	0.0169957	probable 2-oxoglutarate dehydrogenase e1 component mitochondrial
g44165	dhx15	8.78605	34.5161	3.92851	0.000339704	pre-mrna-splicing factor atp-dependent rna helicase dhx15
g45344	dhx15	3.73585	10.0632	2.69368	0.0355401	pre-mrna-splicing factor atp-dependent rna helicase dhx15
g31025	dhx15	14.0076	32.3555	2.30985	0.0211904	pre-mrna-splicing factor atp-dependent rna helicase dhx15
g34151	dhx15	24.8094	52.3209	2.10891	0.0276736	pre-mrna-splicing factor atp-dependent rna helicase dhx15
g31810	dhx32	14.6701	58.4775	3.98618	0.0167971	pre-mrna-splicing factor atp-dependent rna helicase dhx32
g39585	dhx36	3.2461	12.2125	3.76221	0.00441423	probable atp-dependent rna helicase dhx36
g18473	dhx57	45.2642	15.9098	0.351489	0.000922366	atp-dependent rna helicase dhx57
g13575	dhx58	50.7442	14.4565	0.28489	0.0168078	probable atp-dependent rna helicase dhx58
g2962	dhx58	4442.21	223.481	0.0503086	1.30489e-06	probable atp-dependent rna helicase dhx58
g35169	dhx8	6.1851	75.3485	12.1823	5.46608e-07	atp-dependent rna helicase dhx8
g28385	dhx8	15.9242	79.0679	4.96528	1.21538e-06	atp-dependent rna helicase dhx8
g41047	dhx8	4.78439	23.5258	4.9172	0.00291953	atp-dependent rna helicase dhx8
g33614	dhx8	11.2047	38.9393	3.47525	0.000673677	atp-dependent rna helicase dhx8
g28384	dhx8	49.4571	132.123	2.67148	0.00340908	atp-dependent rna helicase dhx8
g18338	dhx8	441.065	963.303	2.18404	0.0123621	atp-dependent rna helicase dhx8
g43577	dhys	4.84732	12.4457	2.56755	0.0277336	deoxyhypusine synthase short=dhs
g9767	di2ba	274.555	126.403	0.460391	0.00715826	disco-interacting protein 2 homolog b-a short=dip2 homolog b-a
g6396	di3l2	264.327	114.722	0.434016	0.00250272	dis3-like exonuclease 2
g4934	dido1	120.267	230.261	1.91458	0.0265794	death-inducer obliterator 1 short=dio-1 short=hdido1
g6160	dip2a	231.187	118.51	0.512617	0.0284904	disco-interacting protein 2 homolog a short=dip2 homolog a
g31965	dip2c	19.3501	8.20035	0.423789	0.0247655	disco-interacting protein 2 homolog c short=dip2 homolog c
g31265	dip2c	15.3642	5.81105	0.378221	0.0249224	disco-interacting protein 2 homolog c short=dip2 homolog c
g5378	dip2c	223.383	78.5631	0.351696	0.000350513	disco-interacting protein 2 homolog c short=dip2 homolog c
g28758	dip2c	26.5459	7.64119	0.287848	0.000595436	disco-interacting protein 2 homolog c short=dip2 homolog c
g5315	dira2	9.29435	1.57111	0.169039	0.000614989	gtp-binding protein di-ras2
g23033	dirc2	16.5794	41.1943	2.48467	0.00761747	disrupted in renal carcinoma protein 2
g8529	dixc1	54.1751	21.4661	0.396236	0.00622386	dixin
g39404	djb12	7.62653	19.3279	2.5343	0.0236918	homolog subfamily b member 12
g20730	djc13	18.4263	3.33321	0.180894	0.00485206	homolog subfamily c member 13
g11271	djc22	30.1854	9.8604	0.326661	0.00142994	homolog subfamily c member 22
g22452	djc27	21.0619	6.1502	0.292005	0.00127662	homolog subfamily c member 27
g9400	djc27	90.9169	21.3406	0.234726	2.70435e-06	homolog subfamily c member 27
g40899	djc28	13.7685	36.7587	2.66977	0.00914388	homolog subfamily c member 28
g25565	djc30	282.479	621.267	2.19934	0.00740866	homolog subfamily c member 30
g2344	dkk3	205.755	537.437	2.61203	0.000753655	dickkopf-related protein 3 short=dickkopf-3 short=dkk-3
g13503	dkk3	31.091	12.1964	0.392281	0.0109417	dickkopf-related protein 3 short=dickkopf-3 short=dkk-3
g2334	dldh	487.859	920.719	1.88726	0.0283736	dihydrolipoyl mitochondrial
g30608	dlg1	3.10842	9.44279	3.03782	0.0276437	disks large homolog 1
g28457	dlg3	2.01729	6.64027	3.29168	0.0202723	disks large homolog 3
g9392	dlg3	115.55	264.702	2.29079	0.00331205	disks large homolog 3
g17177	dlg4	9.59342	2.39076	0.249208	0.021528	disks large homolog 4
g33225	dlg5	14.0932	31.1943	2.21343	0.030597	disks large homolog 5
g4211	dllc	527.739	925.062	1.75288	0.0399899	delta-like protein c short= short=delc flags: precursor
g6339	dlld	41.3719	1.30056	0.0314359	9.4653e-17	delta-like protein d short=
g13930	dln1	34.1119	60.0575	1.7606	0.0476735	protein dln-1
g12388	dlx4b	24.013	4.21355	0.17547	5.2646e-06	homeobox protein dlx4b
g7601	dmap1	53.1924	112.815	2.12088	0.0103978	dna methyltransferase 1-associated protein 1 short=dnmap1 short=dnmt1-associated protein 1
g13186	dmb	17.0965	2.81749	0.164799	0.00238087	proteolipid protein dm beta
g3259	dmp4	170.361	51.7889	0.303995	0.00257687	dentin matrix protein 4 short=dmp-4
g13076	dmrta	2.46208	13.4881	5.47835	0.00227761	doublesex- and mab-3-related transcription factor a1
g39555	dmwd	1.77003	0	0	0.010175	dystrophia myotonica wd repeat-containing protein
g16914	dmx1b	6.96182	0.847552	0.121743	0.000540786	diencephalon mesencephalon homeobox protein 1-b
g37597	dmxl1	1.94098	6.89875	3.55425	0.0219802	-like protein 1 short=x-like 1 protein
g15862	dmxl1	21.7914	49.2284	2.25908	0.0161629	-like protein 1 short=x-like 1 protein
g590	dmxl2	46.4317	10.0578	0.216614	0.0109282	-like protein 2
g16705	dnal4	58.3503	24.9754	0.428026	0.00749912	dynein light chain axonemal
g4765	dnja1	62.0231	18.8849	0.304481	0.000212471	homolog subfamily a member 1 flags: precursor
g39646	dnja2	10.6141	211.359	19.9131	8.82823e-17	homolog subfamily a member 2 flags: precursor
g21667	dnja3	48.1547	100.407	2.08509	0.0214181	homolog subfamily a member mitochondrial
g6467	dnjb5	326.528	153.555	0.470266	0.0444018	homolog subfamily b member 5
g5768	dnjb9	396.762	212.61	0.535864	0.0322249	homolog subfamily b member 9
g18965	dnm3a	246.074	82.9212	0.336977	0.000611482	dna (cytosine-5)-methyltransferase 3a short=dnmt3a
g21396	dnmt1	31.7342	7.74581	0.244084	4.72746e-05	dna (cytosine-5)-methyltransferase 1 short=dnmt1
g4997	dns2a	567.147	249.3	0.439569	0.0125211	deoxyribonuclease-2-alpha
g24200	doc10	168.256	70.674	0.420039	0.00557809	dedicator of cytokinesis protein 10
g29396	dock1	1.77168	6.9328	3.91313	0.012723	dedicator of cytokinesis protein 1
g1218	dock2	139.545	54.9428	0.393729	0.0169715	dedicator of cytokinesis protein 2
g13690	dock4	22.4731	9.2453	0.411395	0.0149376	dedicator of cytokinesis protein 4
g13689	dock4	81.7142	32.28	0.395035	0.00444222	dedicator of cytokinesis protein 4
g9243	dock4	3.89475	0.724721	0.186076	0.0204125	dedicator of cytokinesis protein 4
g17975	dock9	184.845	91.4589	0.494786	0.0180891	dedicator of cytokinesis protein 9
g3577	dock9	98.3706	46.427	0.47196	0.0113718	dedicator of cytokinesis protein 9
g5422	dom3z	250.903	456.448	1.81922	0.0327831	protein dom3z
g680	dop1	117.609	313.801	2.66817	0.0010931	protein dopey-1
g9715	dp13a	61.9891	31.8123	0.513191	0.0236273	dcc-interacting protein 13-alpha short=dip13-alpha
g6856	dpf3	16.8603	7.87858	0.467286	0.0359428	zinc finger protein dpf3
g6857	dpf3	45.1382	20.9587	0.464323	0.0217923	zinc finger protein dpf3
g3984	dpf3	389.465	109.552	0.281289	6.47816e-06	zinc finger protein dpf3
g2326	dpm1	113.96	252.014	2.21141	0.00818572	dolichol-phosphate mannosyltransferase
g5636	dpod2	159.157	353.859	2.22333	0.00796218	dna polymerase delta subunit 2
g10233	dpod3	205.718	102.934	0.500366	0.0116923	dna polymerase delta subunit 3
g28980	dpoe1	8.99859	3.15007	0.350062	0.0421111	dna polymerase epsilon catalytic subunit a
g18676	dpoe1	17.2907	2.86239	0.165545	2.08331e-05	dna polymerase epsilon catalytic subunit a
g24637	dpolb	41.3473	78.4613	1.89762	0.0470363	dna polymerase beta
g1609	dpyd	51.0965	382.543	7.48668	9.68973e-05	dihydropyrimidine dehydrogenase short=dhpdhase short=dpd
g1145	dpyd	159.09	411.933	2.58931	0.00291769	dihydropyrimidine dehydrogenase short=dhpdhase short=dpd
g18811	dpyl2	91.3725	37.4809	0.410198	0.00894031	dihydropyrimidinase-related protein 2 short=drp-2
g21853	dpyl3	747.554	380.312	0.508742	0.025757	dihydropyrimidinase-related protein 3 short=drp-3
g42389	dpyl5	0	2.45192	Inf	0.020676	dihydropyrimidinase-related protein 5 short=drp-5
g4203	dreb	260.015	117.128	0.450465	0.00544584	drebrin
g32025	dsc2	32.0474	74.3442	2.31982	0.0237841	desmocollin-2
g12396	dse	378.849	171.915	0.453783	0.0488071	dermatan-sulfate epimerase short=ds epimerase
g24532	dsn1	13.2062	3.26119	0.246944	0.0352797	kinetochore-associated protein dsn1 homolog
g18017	dsrad	1246.32	321.808	0.258207	2.80496e-06	double-stranded rna-specific adenosine deaminase short=drada
g18651	dtbp1	166.281	76.682	0.461159	0.0162549	dysbindin
g1107	dtna	56.6165	18.4048	0.325078	0.000252412	dystrobrevin alpha short=dtn-a
g23128	dtx3l	1132.89	156.019	0.137718	7.992e-07	e3 ubiquitin-protein ligase dtx3l
g30141	dtx4	5.72755	16.4696	2.87551	0.0110751	protein deltex-4 short=deltex4
g15479	dtx4	13.3927	3.12923	0.233652	0.000937144	protein deltex-4 short=deltex4
g28593	dupd1	1.87145	6.47509	3.45994	0.0286478	dual specificity phosphatase dupd1
g36902	dus1	153.614	447.682	2.91434	0.00798582	dual specificity protein phosphatase 1
g18330	dus10	7.08294	31.0769	4.38757	0.00760065	dual specificity protein phosphatase 10
g37844	dus10	33.4436	66.9571	2.00209	0.0236257	dual specificity protein phosphatase 10
g12047	dus11	171.889	47.4703	0.276169	1.38731e-05	rna rnp complex-1-interacting phosphatase
g24652	dus14	17.4492	6.77634	0.388347	0.0141092	dual specificity protein phosphatase 14
g13705	dus19	89.7715	41.6654	0.464127	0.0145182	dual specificity protein phosphatase 19
g1172	dus1l	112.523	60.194	0.534949	0.0381053	trna-dihydrouridine synthase 1-like
g5642	dus2	37.6151	16.8896	0.449011	0.0289988	dual specificity protein phosphatase 2
g9837	dus23	65.7816	856.326	13.0177	0.0273732	dual specificity protein phosphatase 23
g15360	dus4	76.7522	34.34	0.447415	0.0328622	dual specificity protein phosphatase 4
g27902	dus6	185.834	92.9506	0.500182	0.0134436	dual specificity protein phosphatase 6
g7803	dus7	444.93	227.871	0.512149	0.0157987	dual specificity protein phosphatase 7
g12782	dusty	90.7226	47.0975	0.519137	0.0328257	dual serine threonine and tyrosine protein kinase
g5371	dut	40.6466	106.441	2.61869	0.00197878	deoxyuridine 5 -triphosphate nucleotidohydrolase short=dutpase
g2050	dvl3	58.2504	30.0527	0.515922	0.0436609	segment polarity protein dishevelled homolog dvl-3 short=dishevelled-3
g21427	dvl3	28.6263	14.2088	0.496355	0.0454046	segment polarity protein dishevelled homolog dvl-3 short=dishevelled-3
g12011	dyh10	4.97896	0.739878	0.148601	0.0371951	dynein heavy chain axonemal
g11383	dyh12	9.06542	2.88897	0.31868	0.0124326	dynein heavy chain axonemal
g7602	dyh8	0.954065	4.15638	4.3565	0.0366008	dynein heavy chain axonemal
g6050	dyl2	84.2748	34.8268	0.413252	0.00421547	dynein light chain cytoplasmic
g40172	dyrk2	0.519415	8.75883	16.8629	2.5731e-05	dual specificity tyrosine-phosphorylation-regulated kinase 2
g15963	dyrk4	17385.3	44384.7	2.55301	0.00109524	dual specificity tyrosine-phosphorylation-regulated kinase 4
g42918	dyst	5.00903	13.914	2.77777	0.0190357	dystonin
g13739	dzip1	280.084	115.999	0.414159	0.00189375	zinc finger protein dzip1
g246	e2ak1	64.6234	188.964	2.92408	0.000407988	eukaryotic translation initiation factor 2-alpha kinase 1
g18710	e2ak2	209.699	23.8959	0.113953	2.2256e-05	interferon- double-stranded rna-activated protein kinase
g22173	e2ak3	2127.05	198.702	0.0934167	9.67547e-08	eukaryotic translation initiation factor 2-alpha kinase 3
g16729	e2f4	50.5788	20.0938	0.397276	0.00451639	transcription factor e2f4 short=e2f-4
g11395	e41l1	37.265	181.172	4.86172	2.99998e-07	band -like protein 1
g28174	e41l3	8.18882	20.2741	2.47583	0.0160231	band -like protein 3
g19667	e41l5	399.545	764.993	1.91466	0.0277371	band -like protein 5
g13230	eaa5	0.540737	5.73941	10.6141	0.00138457	excitatory amino acid transporter 5
g15821	eaa5	5.85286	1.09363	0.186854	0.0410679	excitatory amino acid transporter 5
g29400	ece1	62.0216	114.058	1.839	0.0487643	endothelin-converting enzyme 1 short=ece-1
g19403	echa	720.695	1384.78	1.92145	0.0277554	trifunctional enzyme subunit mitochondrial
g30874	echp	27.7251	7.01418	0.25299	0.0271583	peroxisomal bifunctional enzyme short=pbe short=pbfe includes:
g15553	edil3	2.27824	25.5561	11.2175	2.63091e-08	egf-like repeat and discoidin i-like domain-containing protein 3
g9651	edil3	8.14958	31.9911	3.92549	0.00020532	egf-like repeat and discoidin i-like domain-containing protein 3
g15551	edil3	35.2073	85.0397	2.4154	0.0046761	egf-like repeat and discoidin i-like domain-containing protein 3
g24503	edil3	47.0319	108.413	2.30509	0.00621578	egf-like repeat and discoidin i-like domain-containing protein 3
g21817	edn2	11.0976	4.42069	0.398346	0.045202	endothelin-2 short=et-2
g11336	ednra	1953.12	906.456	0.464107	0.00663713	endothelin-1 receptor
g12842	ednrb	947.874	211.782	0.223428	0.000903211	endothelin b receptor short=et-b short=et-br
g3149	ednrb	28.7082	0.775172	0.0270018	0.00485355	endothelin b receptor short=et-b short=et-br
g34253	edrf1	9.44283	21.3602	2.26206	0.0321498	erythroid differentiation-related factor 1
g42529	ef1a	1041.49	4784.36	4.59375	4.1681e-07	elongation factor 1-alpha short=ef-1-alpha
g7366	ef1a	15302.9	57391.2	3.75035	6.89151e-06	elongation factor 1-alpha short=ef-1-alpha
g7367	ef1a	32039.7	79980.5	2.49629	0.00159763	elongation factor 1-alpha short=ef-1-alpha
g39084	ef1a2	333.197	8737.98	26.2247	5.64666e-22	elongation factor 1-alpha 2 short=ef-1-alpha-2
g20041	ef1b	6600.63	13717.1	2.07815	0.0101135	elongation factor 1-beta short=ef-1-beta
g38975	ef1d	455.965	2705.77	5.93415	5.59608e-09	elongation factor 1-delta short=ef-1-delta
g11457	ef1g	16588.1	30211.1	1.82125	0.0331459	elongation factor 1-gamma short=ef-1-gamma
g35957	ef2	5.4146	39.9259	7.37374	2.12765e-07	elongation factor 2 short=ef-2
g36387	ef2	434.843	2017.8	4.64029	1.26793e-07	elongation factor 2 short=ef-2
g43033	ef2	1096.01	4558.68	4.15935	2.10142e-06	elongation factor 2 short=ef-2
g40890	ef2	2419.11	8865.24	3.66467	9.22409e-06	elongation factor 2 short=ef-2
g38225	ef2	1306.02	4671.62	3.57698	1.7674e-05	elongation factor 2 short=ef-2
g6471	ef2	518.165	1695.38	3.27189	5.52908e-05	elongation factor 2 short=ef-2
g34136	ef2	854.247	2149.53	2.51629	0.00152833	elongation factor 2 short=ef-2
g39529	ef2	2137.06	5366.23	2.51103	0.00147535	elongation factor 2 short=ef-2
g24341	ef2	2204.15	5534.18	2.5108	0.00137629	elongation factor 2 short=ef-2
g22930	ef2	12260	22378.4	1.82531	0.0357163	elongation factor 2 short=ef-2
g10310	efha2	299.152	146.8	0.490719	0.0229929	ef-hand domain-containing family member a2
g21226	efha2	15.1662	5.60947	0.369868	0.0161427	ef-hand domain-containing family member a2
g439	efhd2	0.36503	3.01632	8.26322	0.040856	ef-hand domain-containing protein d2
g28679	efna1	97.7787	252.038	2.57763	0.00210778	ephrin-a1
g18806	efna2	68.0923	221.376	3.25112	0.0306572	ephrin-a2
g525	efr3a	417.066	220.126	0.527796	0.033413	protein efr3 homolog a
g29007	egfla	6.2697	2.12834	0.339464	0.0332065	pikachurin
g12558	egfr	419.613	137.842	0.328497	0.000118624	epidermal growth factor receptor flags: precursor
g37290	egln2	15.1472	39.1091	2.58193	0.0385662	egl nine homolog 2
g24714	egr1	159.043	31.685	0.199223	0.0128247	early growth response protein 1 short=egr-1
g23898	ehbp1	37.9121	19.5756	0.516343	0.0413375	eh domain-binding protein 1
g13792	ehbp1	234.442	69.2663	0.295452	3.97603e-05	eh domain-binding protein 1
g5596	ehbp1	49.0869	11.6763	0.237871	0.0098419	eh domain-binding protein 1
g36556	ehd1	131.398	65.548	0.498852	0.0189237	eh domain-containing protein 1
g7000	ehd1	1264.15	490.457	0.387973	0.00656556	eh domain-containing protein 1
g19176	ehd2	1109.39	605.27	0.545587	0.0458582	eh domain-containing protein 2
g14583	ehd3	563.221	230.216	0.40875	0.00665978	eh domain-containing protein 3
g23169	ehmt1	336.312	174.617	0.51921	0.0231259	histone-lysine n- h3 lysine-9 specific 5
g33733	ei2ba	13.4553	61.3795	4.56173	9.72146e-06	translation initiation factor eif-2b subunit alpha
g31108	ei2ba	10.0468	29.3272	2.91905	0.00329045	translation initiation factor eif-2b subunit alpha
g38716	ei2ba	12.5091	28.4214	2.27205	0.0161898	translation initiation factor eif-2b subunit alpha
g12407	ei2bb	437.326	1284.76	2.93777	0.000234013	translation initiation factor eif-2b subunit beta
g41993	ei2bg	4.0648	20.6272	5.07459	0.000161238	translation initiation factor eif-2b subunit gamma
g1973	ei3eb	2856.43	6016.63	2.10635	0.00986384	eukaryotic translation initiation factor 3 subunit e-b short=eif3e-b
g34725	eif2a	34.5332	87.3423	2.52923	0.00337552	eukaryotic translation initiation factor 2a short=eif-2a
g40344	eif3a	170.22	521.442	3.06333	0.000171266	eukaryotic translation initiation factor 3 subunit a short=eif3a
g29447	eif3a	133.741	300.549	2.24725	0.00596895	eukaryotic translation initiation factor 3 subunit a short=eif3a
g18272	eif3a	810.33	1477.03	1.82276	0.0359713	eukaryotic translation initiation factor 3 subunit a short=eif3a
g2318	eif3b	781.754	1689.59	2.16128	0.0429389	eukaryotic translation initiation factor 3 subunit b short=eif3b
g9409	eif3b	1070.49	2015.86	1.88312	0.0296069	eukaryotic translation initiation factor 3 subunit b short=eif3b
g4536	eif3c	3555.33	7389.15	2.07833	0.0115584	eukaryotic translation initiation factor 3 subunit c short=eif3c
g34655	eif3d	52.3281	245.355	4.68878	7.26665e-07	eukaryotic translation initiation factor 3 subunit d short=eif3d
g29489	eif3d	282.643	1059.43	3.7483	1.08215e-05	eukaryotic translation initiation factor 3 subunit d short=eif3d
g9940	eif3d	2301.16	5254.71	2.2835	0.0043593	eukaryotic translation initiation factor 3 subunit d short=eif3d
g32569	eif3d	837.794	1842.68	2.19945	0.00629634	eukaryotic translation initiation factor 3 subunit d short=eif3d
g45780	eif3f	210.7	730.029	3.46478	3.29763e-05	eukaryotic translation initiation factor 3 subunit f short=eif3f
g19030	eif3f	910.27	2605.17	2.86197	0.000303805	eukaryotic translation initiation factor 3 subunit f short=eif3f
g21398	eif3g	2915	5850.39	2.007	0.0139726	eukaryotic translation initiation factor 3 subunit g short=eif3g
g16098	eif3h	2547.35	7394.06	2.90265	0.000253333	eukaryotic translation initiation factor 3 subunit h short=eif3h
g11687	eif3h	891.418	1889.54	2.1197	0.010546	eukaryotic translation initiation factor 3 subunit h short=eif3h
g120	eif3i	2757.38	5655.35	2.05099	0.0121347	eukaryotic translation initiation factor 3 subunit i short=eif3i
g23398	eif3i	223.031	110.241	0.494288	0.0277894	eukaryotic translation initiation factor 3 subunit i short=eif3i
g9700	eif3k	1887.12	4461.23	2.36404	0.00325882	eukaryotic translation initiation factor 3 subunit k short=eif3k
g21411	eif3l	1332.86	2760.28	2.07095	0.0120312	eukaryotic translation initiation factor 3 subunit l short=eif3l
g21410	eif3l	864.722	1590.66	1.8395	0.0354469	eukaryotic translation initiation factor 3 subunit l short=eif3l
g25700	eki1	25.9711	11.3035	0.435232	0.0117599	ethanolamine kinase 1 short=eki 1
g12669	elf1	380.9	193.79	0.50877	0.0234431	ets-related transcription factor elf-1
g5675	elf1	505.686	236.161	0.467012	0.0269916	ets-related transcription factor elf-1
g22976	elk3	435.19	227.818	0.523492	0.0300186	ets domain-containing protein elk-3
g14234	elk3	391.221	176.572	0.451335	0.00760821	ets domain-containing protein elk-3
g35231	elk3	28.4276	12.5863	0.442748	0.0223387	ets domain-containing protein elk-3
g26370	ell	6.86334	1.97235	0.287375	0.00767047	rna polymerase ii elongation factor ell
g31963	ell	31.4109	8.28029	0.263612	0.0148094	rna polymerase ii elongation factor ell
g26310	ell	16.4998	1.3925	0.0843954	0.00134269	rna polymerase ii elongation factor ell
g17889	ell2	6.52588	15.2168	2.33176	0.0488176	rna polymerase ii elongation factor ell2
g13577	ell2	14.8665	4.33155	0.291364	0.0023978	rna polymerase ii elongation factor ell2
g8965	ell3	99.9337	32.3887	0.324102	0.00164635	rna polymerase ii elongation factor ell3
g687	elov4	9.26818	2.14305	0.231227	0.00444559	elongation of very long chain fatty acids protein 4
g21282	elov6	45.75	17.157	0.375016	0.00330315	elongation of very long chain fatty acids protein 6
g15511	elov7	498.606	1045.01	2.09587	0.0127505	elongation of very long chain fatty acids protein 7
g30359	elp3	4.95384	22.8492	4.61242	0.000119493	elongator complex protein 3
g43241	elp3	7.43228	25.547	3.43731	0.00144743	elongator complex protein 3
g25235	elp3	11.3532	5.09211	0.448519	0.0466572	elongator complex protein 3
g35804	emal1	30.3652	60.4992	1.99239	0.0323734	echinoderm microtubule-associated 1 short=emap-1
g8562	emal3	463.903	188.412	0.406145	0.0344231	echinoderm microtubule-associated 3 short=emap-3
g18528	emil2	12.0159	2.38373	0.198382	0.00971236	emilin-2
g37838	emp2	10.4776	23.0366	2.19865	0.0405014	epithelial membrane protein 2 short=emp-2
g5444	emp2	321.574	147.798	0.459607	0.00612283	epithelial membrane protein 2 short=emp-2
g44869	enc1	2.36095	8.71495	3.69129	0.00939805	ectoderm-neural cortex protein 1 short=enc-1
g41594	enc2	2.20628	10.803	4.89648	0.00155252	ectoderm-neural cortex protein 2 short=enc-2
g4375	enc2	52.643	118.231	2.24591	0.01406	ectoderm-neural cortex protein 2 short=enc-2
g8445	endd1	82.6483	26.6491	0.32244	0.0216906	endonuclease domain-containing 1 protein flags: precursor
g25608	endou	2452.04	382.325	0.155921	4.72267e-08	poly -specific endoribonuclease
g33717	endub	171.887	45.8183	0.26656	0.000176962	poly -specific endoribonuclease-b
g21027	enl	2.52359	10.4219	4.12978	0.00281107	protein enl
g45923	enoa	6916.12	32275.5	4.66671	2.91685e-07	alpha-enolase
g21638	enoa	85482.3	190646	2.23024	0.00560802	alpha-enolase
g9613	enof1	14.2438	76.4599	5.36793	7.00141e-07	mitochondrial enolase superfamily member 1
g33826	enpl	6.26321	43.944	7.01622	0.000758543	endoplasmin
g41748	enpl	19.6365	69.5871	3.54376	0.00167748	endoplasmin
g26521	enpp2	9.15731	30.7451	3.35744	0.00718293	ectonucleotide pyrophosphatase phosphodiesterase family member 2 short=e-npp 2
g3925	enpp2	466.579	161.482	0.346098	0.00647629	ectonucleotide pyrophosphatase phosphodiesterase family member 2 short=e-npp 2
g15727	entk	12.5369	2.60006	0.207393	0.00771287	enteropeptidase
g17331	entp2	18.9747	1.59582	0.0841025	0.0377675	ectonucleoside triphosphate diphosphohydrolase 2 short=ntpdase 2
g32039	entp4	4.46661	19.787	4.42998	0.010801	ectonucleoside triphosphate diphosphohydrolase 4 short=ntpdase 4
g11513	entp4	94.4891	210.55	2.2283	0.012505	ectonucleoside triphosphate diphosphohydrolase 4 short=ntpdase 4
g43149	ep300	5.12137	33.8361	6.60684	1.22532e-06	histone acetyltransferase p300 short=p300 hat
g18784	epa4a	59.3949	27.3273	0.460096	0.0117401	ephrin type-a receptor 4-a
g32023	epc2	41.4731	17.0078	0.410093	0.00355238	enhancer of polycomb homolog 2
g3131	epc2	225.052	85.4899	0.379867	0.000578815	enhancer of polycomb homolog 2
g9735	epdr1	107.86	336.822	3.12278	0.0426944	mammalian ependymin-related protein 1 short=merp-1
g37519	epha2	1.50298	8.98866	5.98054	0.0014638	ephrin type-a receptor 2
g23947	epha2	16.322	4.59417	0.281472	0.0013401	ephrin type-a receptor 2
g294	epha7	35.1215	11.5666	0.32933	0.00115513	ephrin type-a receptor 7
g1047	ephb3	48.6513	11.5973	0.238375	4.58401e-05	ephrin type-b receptor 3
g45535	ephb4	5.75797	16.5146	2.86813	0.00703695	ephrin type-b receptor 4
g40112	epn1	39.9925	76.5271	1.91354	0.0296865	epsin-1
g36837	epn2	7.65813	21.9038	2.8602	0.00990794	epsin-2
g8234	epn2	117.236	60.4425	0.515562	0.0218008	epsin-2
g14109	epn3	5.30681	16.7311	3.15276	0.00527229	epsin-3
g37300	epn4	17.3055	49.5522	2.86338	0.00172324	clathrin interactor 1
g43497	epn4	28.193	59.5206	2.11119	0.0123923	clathrin interactor 1
g21512	epn4	73.136	37.6811	0.51522	0.0333759	clathrin interactor 1
g45773	erap1	4.70799	15.0953	3.20632	0.00955764	endoplasmic reticulum aminopeptidase 1
g15960	erbb4	269.495	822.228	3.05099	0.000160431	receptor tyrosine-protein kinase erbb-4
g7893	ercc1	25.7279	54.4559	2.11661	0.0243508	dna excision repair protein ercc-1
g28409	ercc6	28.0535	58.5692	2.08777	0.0179727	dna excision repair protein ercc-6
g21994	ercc6	24.58	47.6871	1.94008	0.0441002	dna excision repair protein ercc-6
g18579	ercc8	8.58851	38.2328	4.45163	3.08817e-05	dna excision repair protein ercc-8
g44653	erf3a	22.8747	77.4657	3.38653	0.000248218	eukaryotic peptide chain release factor gtp-binding subunit erf3a short=eukaryotic peptide chain release factor subunit 3a short=erf3a
g38451	erf3a	20.0461	66.2575	3.30525	0.000355515	eukaryotic peptide chain release factor gtp-binding subunit erf3a short=eukaryotic peptide chain release factor subunit 3a short=erf3a
g15425	erln1	332.729	143.894	0.432467	0.00338905	erlin-1
g27164	erln2	892.495	495.3	0.554961	0.0391047	erlin-2
g19369	ern1	151.459	57.337	0.378564	0.000906643	serine threonine-protein kinase endoribonuclease ire1
g17552	ero1b	154.709	79.7812	0.515685	0.0183885	ero1-like protein beta short=ero1-l-beta
g43091	erp44	6.93123	50.2984	7.25678	4.38249e-08	endoplasmic reticulum resident protein 44 short=er protein 44 short=erp44
g15194	err3	123.717	63.3416	0.511989	0.0275556	estrogen-related receptor gamma
g17979	es1	745.885	1631.32	2.1871	0.0360497	es1 protein mitochondrial flags: precursor
g17192	es8l2	124.703	48.6462	0.390098	0.00269349	epidermal growth factor receptor kinase substrate 8-like protein 2 short=eps8-like protein 2
g19754	esr1	65.4493	18.0615	0.275962	0.000362386	estrogen receptor short=er
g23190	esr1	2338.31	476.124	0.203619	3.12696e-08	estrogen receptor short=er
g6324	esr2	64.3389	11.0422	0.171626	0.00588722	estrogen receptor beta short=er-beta
g26405	esrp2	3.66059	16.5201	4.51297	0.000523395	epithelial splicing regulatory protein 2
g31284	esrp2	9.52825	21.8606	2.2943	0.0274135	epithelial splicing regulatory protein 2
g5648	est1	34.7626	320.67	9.22458	0.00211933	liver carboxylesterase
g20883	est2a	1178.42	606.86	0.51498	0.0254049	extended synaptotagmin-2-a short=e-syt2-a
g25825	esyt1	54.4946	23.6897	0.434716	0.011267	extended synaptotagmin-1 short=e-syt1
g23127	esyt1	1509.28	609.372	0.40375	0.00136721	extended synaptotagmin-1 short=e-syt1
g988	etfa	163.614	453.332	2.77075	0.0193993	electron transfer flavoprotein subunit mitochondrial short=alpha-etf flags: precursor
g45187	etfb	19.6391	51.3793	2.61618	0.00257475	electron transfer flavoprotein subunit beta short=beta-etf
g1003	etfd	41.3342	90.6944	2.19417	0.0116975	electron transfer flavoprotein-ubiquinone mitochondrial short=etf-qo short=etf-ubiquinone oxidoreductase
g1004	etfd	262.772	506.714	1.92834	0.0234655	electron transfer flavoprotein-ubiquinone mitochondrial short=etf-qo short=etf-ubiquinone oxidoreductase
g6392	etv4	146.729	44.7641	0.305081	0.0113994	ets translocation variant 4
g45735	etv4	5.82787	1.20434	0.206651	0.0102564	ets translocation variant 4
g27999	etv5	85.1243	14.509	0.170445	4.27008e-08	ets translocation variant 5
g20703	etv6	127.941	62.0774	0.485202	0.0463058	transcription factor etv6
g32200	eurl	5.82515	38.8668	6.67225	6.76666e-07	protein eurl homolog
g10413	evc	302.936	850.023	2.80595	0.000596246	ellis-van creveld syndrome protein
g16484	evi5	77.6324	36.2136	0.466476	0.0177353	ecotropic viral integration site 5 protein homolog short=evi-5
g44895	exd2	1.30911	7.37841	5.63622	0.00240583	exonuclease 3 -5 domain-containing protein 2
g28744	exoc2	9.07325	23.3816	2.57698	0.00889771	exocyst complex component 2
g35060	exoc4	2.74707	9.23017	3.36	0.0154254	exocyst complex component 4
g16105	exoc6	760.734	369.41	0.485597	0.00787625	exocyst complex component 6
g9547	exoc6	75.615	34.5978	0.457552	0.00742675	exocyst complex component 6
g45186	exoc7	55.958	104.398	1.86565	0.03596	exocyst complex component 7
g3179	exos1	803.982	1417.23	1.76277	0.0435831	3 -5 exoribonuclease csl4 homolog
g32462	ext2	6.55472	20.9894	3.20218	0.00444691	exostosin-2
g31287	ext2	10.677	26.1695	2.45103	0.012594	exostosin-2
g36075	ext2	15.5633	33.4308	2.14805	0.0279101	exostosin-2
g14155	eya3	142.068	63.339	0.445837	0.00737722	eyes absent homolog 3
g20766	eys	3.71021	0.696512	0.187729	0.0384476	protein eyes shut homolog
g8448	ezh1	2563.34	828.022	0.323024	7.98901e-05	histone-lysine n-methyltransferase ezh1
g35192	ezh2	1.405	5.82286	4.14439	0.0290687	histone-lysine n-methyltransferase ezh2
g8447	ezh2	520.318	180.26	0.346442	0.000448814	histone-lysine n-methyltransferase ezh2
g16784	ezh2	29.895	7.9677	0.266522	0.00767952	histone-lysine n-methyltransferase ezh2
g34086	ezri	92.4647	190.926	2.06485	0.0179129	ezrin
g10043	f101a	1530.2	678.532	0.443428	0.00643906	protein fam101a
g3726	f102b	281.954	104.291	0.369886	0.00447151	protein fam102b
g28471	f107b	32.5592	243.948	7.49244	0.00253506	protein fam107b
g3970	f108a	382.907	202.882	0.529845	0.0198644	abhydrolase domain-containing protein fam108a flags: precursor
g44589	f108c	1.49138	6.5933	4.42093	0.0144429	abhydrolase domain-containing protein fam108c1
g45681	f110b	21.7574	81.3294	3.73801	5.19079e-05	protein fam110b
g9720	f116a	664.634	375.466	0.564921	0.036116	protein fam116a
g11562	f117a	364.712	72.2454	0.198089	6.12087e-06	protein fam117a
g7728	f122a	828.678	399.458	0.482043	0.0115557	protein fam122a
g8383	f122a	216.028	62.9474	0.291385	0.00300625	protein fam122a
g6778	f123a	157.545	76.3539	0.484649	0.0460673	protein fam123a
g4190	f123b	31.1051	14.9059	0.479212	0.0330078	protein fam123b
g12816	f124a	37.6345	15.572	0.413769	0.0094724	protein fam124a
g11531	f126b	21.0292	9.31684	0.443044	0.022864	protein fam126b
g13278	f131b	18.7214	7.47088	0.399057	0.0239434	protein fam131b
g3666	f132a	218.826	35.4562	0.162029	1.83433e-06	protein fam132a flags: precursor
g35022	f134a	6.31646	18.9717	3.00353	0.00538337	protein fam134a
g534	f134b	315.68	123.646	0.391683	0.00113723	protein fam134b
g42418	f134c	12.362	26.7742	2.16584	0.0278554	protein fam134c
g14813	f154a	16.9903	3.47291	0.204406	0.00306723	protein fam154a
g548	f154b	10.1572	2.7664	0.272358	0.00495139	protein fam154b
g35540	f167a	13.8565	30.2613	2.1839	0.0223033	protein fam167a
g1255	f168a	945.562	305.628	0.323224	0.000101872	protein fam168a
g10868	f16a2	133.526	67.5624	0.505986	0.0221553	fts and hook-interacting protein homolog short=fhip
g10927	f16p1	10734.9	29346.9	2.73377	0.000867634	fructose- -bisphosphatase 1 short=fbpase 1
g41156	f1711	5.48313	20.1368	3.6725	0.00123433	protein fam171a1 flags: precursor
g9429	f1712	92.95	35.188	0.378569	0.0023119	protein fam171a2 flags: precursor
g6754	f180a	45.3575	93.1643	2.054	0.0134283	protein fam180a flags: precursor
g26245	f1892	11.7226	27.6019	2.3546	0.0210784	protein fam189a2
g32219	f18b1	11.9054	35.3909	2.97267	0.00214722	protein fam18b1
g45313	f262	0.523084	7.06478	13.506	0.000326617	6-phosphofructo-2-kinase fructose- -biphosphatase 2 short=6pf-2-k fru- -p2ase 2 short=pfk fbpase 2
g20025	f262	13.5322	2.99309	0.221184	0.00326146	6-phosphofructo-2-kinase fructose- -biphosphatase 2 short=6pf-2-k fru- -p2ase 2 short=pfk fbpase 2
g21923	fa10	657.477	311.05	0.473096	0.0198545	coagulation factor x
g10467	fa13a	350.112	1379.55	3.9403	0.000140593	protein fam13a
g10468	fa13a	430.266	1203.13	2.79625	0.000307059	protein fam13a
g32019	fa13a	381.075	942.773	2.47398	0.0237118	protein fam13a
g32919	fa13b	5.41727	12.2499	2.26126	0.0442876	protein fam13b
g2180	fa26e	279.928	66.353	0.237036	0.00358328	protein fam26e
g37726	fa46a	4.48728	13.1958	2.9407	0.0111705	protein fam46a
g684	fa46a	124.908	52.0899	0.417027	0.0056993	protein fam46a
g12646	fa46a	471.966	126.566	0.268168	4.48517e-06	protein fam46a
g7139	fa46a	43.4143	6.54757	0.150816	0.00115567	protein fam46a
g26555	fa46c	75.5159	31.459	0.416588	0.00485578	protein fam46c
g23952	fa48a	96.1353	188.624	1.96206	0.0225531	protein fam48a
g19826	fa49a	203.427	86.4579	0.425007	0.0270102	protein fam49a
g16933	fa49a	408.722	149.045	0.364661	0.000711119	protein fam49a
g16860	fa5	6505.92	18143.3	2.78874	0.0025682	coagulation factor v
g10601	fa55c	127.72	58.9494	0.46155	0.0110668	protein fam55c flags: precursor
g4529	fa57b	75.8855	36.689	0.483479	0.0316072	protein fam57b
g21367	fa65b	281.347	23.1169	0.0821651	0.0499955	protein fam65b
g42554	fa65b	3.30486	0.119448	0.036143	0.0389243	protein fam65b
g6843	fa69a	90.479	536.591	5.93056	0.00385592	protein fam69a
g2028	fa69c	11.3898	35.6581	3.1307	0.00250382	protein fam69c
g12289	fa83f	18.5716	5.15068	0.277341	0.0320446	protein fam83f
g12288	fa83f	1.74058	0.0737416	0.0423662	0.0442946	protein fam83f
g21357	fa98a	382.064	185.779	0.486251	0.011994	protein fam98a
g969	faaa	133.499	48.8656	0.366038	0.00106523	fumarylacetoacetase short=faa
g8706	fabph	3015.37	9287.3	3.07999	0.0491167	fatty acid-binding heart
g8570	face2	110.432	57.6323	0.521879	0.0270779	caax prenyl protease 2
g39538	facr1	75.6234	293.836	3.88551	5.47466e-06	fatty acyl- reductase 1
g37986	facr1	57.1945	164.76	2.8807	0.000313906	fatty acyl- reductase 1
g36389	facr1	83.9606	234.393	2.7917	0.000709131	fatty acyl- reductase 1
g19558	facr1	1932.21	3755.36	1.94356	0.012984	fatty acyl- reductase 1
g44259	fadd	1.59461	11.0852	6.95163	0.000383389	protein fadd
g44774	faf2a	15.7667	44.3224	2.81114	0.00252046	fas-associated factor 2-a
g40003	fah2a	156.994	66.3844	0.422847	0.00429993	fatty-acid amide hydrolase 2-a
g798	faim1	169.342	47.3985	0.279899	5.03163e-05	fas apoptotic inhibitory molecule 1 short=rfaim
g11925	fak1	462.377	259.57	0.561382	0.0376295	focal adhesion kinase 1 short=fadk 1
g9571	fak1	656.159	331.552	0.505292	0.0173008	focal adhesion kinase 1 short=fadk 1
g9572	fak1	48.0401	21.5476	0.448533	0.0104419	focal adhesion kinase 1 short=fadk 1
g20396	fakd1	33.5211	15.3022	0.456494	0.0177383	fast kinase domain-containing protein 1
g25839	fakd1	32.9595	12.0021	0.364146	0.00454715	fast kinase domain-containing protein 1
g17829	fakd1	81.4018	26.9616	0.331216	0.000559519	fast kinase domain-containing protein 1
g15284	fancl	4.76692	1.1097	0.232791	0.0310811	e3 ubiquitin-protein ligase fancl
g9666	fank1	28.7615	9.44491	0.328387	0.0233777	fibronectin type 3 and ankyrin repeat domains 1 protein
g3576	farp1	608.565	343.587	0.564585	0.045203	and pleckstrin domain-containing protein 1
g19959	farp1	390.395	123.924	0.317433	8.61578e-05	and pleckstrin domain-containing protein 1
g3575	farp1	241.652	52.0748	0.215495	9.48102e-08	and pleckstrin domain-containing protein 1
g7129	farp2	19.0872	76.6908	4.01793	4.51562e-05	and pleckstrin domain-containing protein 2
g25964	farp2	22.9484	67.6607	2.94839	0.000647141	and pleckstrin domain-containing protein 2
g6223	farp2	24.6363	3.72205	0.15108	7.10617e-07	and pleckstrin domain-containing protein 2
g1173	fas	1647.72	297.584	0.180603	2.90655e-05	fatty acid synthase includes:
g39487	fas	76.4062	12.0469	0.157669	1.32365e-05	fatty acid synthase includes:
g41168	fat1	0.898752	4.57542	5.09086	0.0318338	protocadherin fat 1
g34458	fat1	3.2087	12.9019	4.02092	0.00299763	protocadherin fat 1
g41740	fat1	10.6416	25.5349	2.39953	0.0176824	protocadherin fat 1
g41348	fat3	0.353472	4.57094	12.9315	0.00257819	protocadherin fat 3
g22363	fat4	37.0108	14.1758	0.383017	0.00287381	protocadherin fat 4 short=hfat4
g7935	fbcdb	16.2784	3.41007	0.209485	0.049536	fibrinogen c domain-containing protein 1-b
g336	fbln2	369.006	178.844	0.484664	0.0163329	fibulin-2 short=fibl-2 flags: precursor
g13204	fbln3	202.411	110.349	0.545176	0.0310695	egf-containing fibulin-like extracellular matrix protein 1
g8559	fbln3	574.766	186.961	0.325283	0.00165457	egf-containing fibulin-like extracellular matrix protein 1
g4899	fbln4	150.713	51.1933	0.339674	0.0438602	egf-containing fibulin-like extracellular matrix protein 2
g20319	fbln7	2.54443	14.2948	5.61805	0.00341037	fibulin-7 short=fibl-7 flags: precursor
g44683	fbln7	2.18502	0.217003	0.099314	0.0394628	fibulin-7 short=fibl-7 flags: precursor
g22298	fbn2	23.0601	9.2134	0.399539	0.0270498	fibrillin-2 flags: precursor
g13140	fbp1l	1421.94	830.216	0.58386	0.0429495	formin-binding protein 1-like
g36246	fbw1b	6.49365	29.6949	4.57291	6.29991e-05	f-box wd repeat-containing protein 11
g40606	fbw1b	11.1925	43.4678	3.88365	0.000143456	f-box wd repeat-containing protein 11
g11228	fbx10	55.3295	25.1758	0.455015	0.0183423	f-box only protein 10
g10499	fbx11	1727.92	749.24	0.433609	0.00212549	f-box only protein 11
g205	fbx15	2.06282	0	0	0.0127873	f-box only protein 15
g22078	fbx21	248.836	792.759	3.18587	0.0123875	f-box only protein 21
g35691	fbx30	0.968832	5.53363	5.71165	0.00988156	f-box only protein 30
g42657	fbx30	2.6822	8.03224	2.99465	0.0421705	f-box only protein 30
g5141	fbx33	624.381	224.686	0.359854	0.000313489	f-box only protein 33
g15032	fbx42	176.135	90.4941	0.513776	0.03328	f-box only protein 42
g37030	fbx42	29.8497	7.571	0.253638	0.000223586	f-box only protein 42
g8117	fbx47	1.93947	0	0	0.00895373	f-box only protein 47
g23074	fbx7	189.66	105.608	0.556828	0.0469649	f-box only protein 7
g37938	fbxl3	13.1631	30.7604	2.33687	0.0176327	f-box lrr-repeat protein 3
g33202	fbxl3	38.9368	84.0708	2.15916	0.0149148	f-box lrr-repeat protein 3
g6904	fbxl4	3.17191	0.470682	0.148391	0.0166116	f-box lrr-repeat protein 4
g14713	fbxl7	62063	375096	6.0438	2.9555e-09	f-box lrr-repeat protein 7
g1280	fbxl7	26.8352	55.1307	2.05442	0.0294184	f-box lrr-repeat protein 7
g41448	fbxw5	14.1442	37.345	2.6403	0.00773715	f-box wd repeat-containing protein 5
g20941	fbxw9	157.448	89.3069	0.567216	0.0467401	f-box wd repeat-containing protein 9
g19934	fcerg	1449.8	401.006	0.276593	0.0111029	high affinity immunoglobulin epsilon receptor subunit gamma
g24805	fcgbp	1.87666	0	0	0.00937366	c-binding protein
g2948	fcho2	1012.35	425.748	0.420554	0.00283876	fch domain only protein 2
g16984	fcho2	23.6293	6.48412	0.27441	0.000366647	fch domain only protein 2
g1254	fcsd2	706.115	270.86	0.383592	0.000936819	fch and double sh3 domains protein 2
g23666	fcsd2	12.4984	3.92269	0.313854	0.0105902	fch and double sh3 domains protein 2
g7768	fcsd2	230.45	71.5432	0.310449	4.35277e-05	fch and double sh3 domains protein 2
g15175	fel	2.55608	0.404324	0.158182	0.0441184	fish-egg lectin short=fel
g43481	fem1b	4.82393	15.6765	3.24974	0.0069867	protein fem-1 homolog b short=fem1b
g39734	fem1c	1.66848	8.61419	5.16289	0.00277469	protein fem-1 homolog c short=fem1c
g2307	fer	228.736	104.628	0.457419	0.00625724	tyrosine-protein kinase fer
g23657	ferm1	59.6365	196.961	3.30269	0.00365999	fermitin family homolog 1
g13438	ferm1	263.377	725.757	2.75559	0.038858	fermitin family homolog 1
g614	fgd3	306.447	120.956	0.394703	0.00221161	and ph domain-containing protein 3
g18857	fgf10	19.6914	5.20121	0.264137	0.00103079	fibroblast growth factor 10 short=fgf-10 flags: precursor
g15850	fgf23	5.06586	0	0	0.00596587	fibroblast growth factor 23 short=fgf-23 flags: precursor
g15849	fgf4b	22.4883	66.0876	2.93876	0.0013948	fibroblast growth factor 4b short=fgf-4b
g7573	fgfp1	85.8384	4.65187	0.0541934	0.0106403	fibroblast growth factor-binding protein 1 short=fgf-bp short=fgf-bp1 short=fgf-binding protein 1 short=fgfbp-1 short=growth factor-binding protein 1 flags: precursor
g36211	fgfr2	80.8331	189.896	2.34924	0.00707065	fibroblast growth factor receptor 2 short=fgfr-2 flags: precursor
g28940	fgfr2	108.095	209.403	1.93722	0.0423394	fibroblast growth factor receptor 2 short=fgfr-2 flags: precursor
g25370	fgfr2	4624.74	2422.78	0.523874	0.0299352	fibroblast growth factor receptor 2 short=fgfr-2 flags: precursor
g41681	fgfr3	8.16035	30.5806	3.74746	0.000327425	fibroblast growth factor receptor 3 short=fgfr-3 flags: precursor
g29124	fgfr3	24.6549	62.9302	2.55244	0.00422158	fibroblast growth factor receptor 3 short=fgfr-3 flags: precursor
g27448	fgfr3	29.0889	62.0021	2.13147	0.0201745	fibroblast growth factor receptor 3 short=fgfr-3
g29842	fgfr3	12.5359	26.1148	2.0832	0.0471353	fibroblast growth factor receptor 3 short=fgfr-3 flags: precursor
g4204	fgfr4	19.2241	7.62592	0.396686	0.0173853	fibroblast growth factor receptor 4 short=fgfr-4 flags: precursor
g19499	fgrl1	24.6506	2.51653	0.102088	0.000188856	fibroblast growth factor receptor-like 1 flags: precursor
g19493	fhdc1	130.749	237.244	1.8145	0.0494089	fh2 domain-containing protein 1
g8601	fhdc1	6.49824	0.465718	0.0716683	0.0355525	fh2 domain-containing protein 1
g2289	fhit	18.62	50.8751	2.73228	0.00196477	bis(5 -adenosyl)-triphosphatase
g14625	fhod3	732.928	277.946	0.379228	0.00131712	fh1 fh2 domain-containing protein 3
g3455	fhod3	38.9867	10.4193	0.267252	9.61833e-05	fh1 fh2 domain-containing protein 3
g1815	fibg	4.7072	37.8708	8.04529	0.000712056	fibrinogen gamma chain flags: precursor
g8412	fibin	104.742	220.021	2.10061	0.0407498	fin bud initiation factor flags: precursor
g26084	fkb10	451.818	223.813	0.495362	0.0152668	peptidyl-prolyl cis-trans isomerase fkbp10 short=ppiase fkbp10
g15274	fkb10	1195.47	582.9	0.487589	0.0174663	peptidyl-prolyl cis-trans isomerase fkbp10 short=ppiase fkbp10
g32318	fkbp4	44.4239	157.579	3.54717	0.0322755	peptidyl-prolyl cis-trans isomerase fkbp4 short=ppiase fkbp4
g38201	fl2d	24.2784	5.34473	0.220143	3.55901e-05	pre-mrna-splicing regulator wtap
g31673	fli1	14.3135	5.3759	0.375583	0.0189737	friend leukemia integration 1 transcription factor
g2508	flip1	76.7789	38.1624	0.497042	0.0125969	filamin-a-interacting protein 1 short=filip
g12814	flip1	103.057	45.6684	0.443137	0.00814776	filamin-a-interacting protein 1 short=filip
g29565	flna	28.9525	85.7978	2.9634	0.00412056	filamin-a short=fln-a
g37484	flna	75.6305	175.797	2.32441	0.00410137	filamin-a short=fln-a
g41521	flnc	0.886279	5.85152	6.60234	0.00537529	filamin-c short=fln-c
g41194	flnc	0.967485	4.53741	4.6899	0.0223698	filamin-c short=fln-c
g29999	flnc	2.74614	11.0352	4.01843	0.00444553	filamin-c short=fln-c short=flnc
g29488	flnc	6.84937	1.8321	0.267485	0.0450343	filamin-c short=fln-c
g45013	flot1	10.6606	57.7843	5.42037	1.16783e-06	flotillin-1
g36720	flot1	21.7422	44.9472	2.06727	0.0265045	flotillin-1
g13817	flot2	420.288	215.011	0.511579	0.0198449	flotillin-2
g13818	flot2	2046.44	694.044	0.339147	0.000184498	flotillin-2
g15873	flrt3	291.912	77.8413	0.26666	0.00174416	leucine-rich repeat transmembrane protein flrt3
g1684	fmn	74.817	17.7883	0.237757	0.0057251	formin
g5930	fmn2	10.7159	3.90916	0.3648	0.0177029	formin-2
g12520	fmnl	22.7308	7.92006	0.348428	0.0281928	formin-like protein 1
g21883	fmnl	152.926	43.5689	0.284902	0.0286684	formin-like protein 1
g19993	fmnl	151.191	38.1685	0.252452	0.0221816	formin-like protein 1
g9281	fmo5	82.0905	174.741	2.12864	0.0229068	dimethylaniline monooxygenase 5
g16949	fnbp4	797.494	383.652	0.481072	0.0101162	formin-binding protein 4
g6533	fnd3a	989.12	462.272	0.467357	0.00677982	fibronectin type-iii domain-containing protein 3a
g19778	fnd3b	484.316	184.509	0.380969	0.000595266	fibronectin type iii domain-containing protein 3b
g7491	fnd3b	658.672	225.173	0.341859	7.40103e-05	fibronectin type iii domain-containing protein 3b
g23247	fnip2	155.531	40.5287	0.260582	0.0392016	folliculin-interacting protein 2
g29251	fnta	18.3887	48.6565	2.646	0.00389519	protein farnesyltransferase geranylgeranyltransferase type-1 subunit alpha
g11691	fog2	11.666	4.83765	0.41468	0.0230028	zinc finger protein zfpm2
g8416	fop	255.167	85.2826	0.334223	0.000411548	friend of prmt1 protein
g23476	fosl2	2010.2	660.691	0.328669	0.0152684	fos-related antigen 2 short=fra-2
g12607	foxa2	665.374	1634.78	2.45694	0.0136991	hepatocyte nuclear factor 3-beta short=hnf-3-beta short=hnf-3b
g15592	foxd2	2.29265	13.4454	5.86456	0.000495169	forkhead box protein d2 short= 2 short=x 2
g7112	foxg1	7.55857	33.5898	4.44393	0.0127103	forkhead box protein g1 short= 1
g18910	foxg1	2.04307	6.24215	3.05528	0.0486795	forkhead box protein g1 short= 1
g31655	foxj3	2.7661	8.60736	3.11173	0.0262088	forkhead box protein j3
g29253	foxj3	16.6686	6.03832	0.362258	0.0127235	forkhead box protein j3
g32142	foxk1	24.6922	93.4305	3.78381	0.000938738	forkhead box protein k1
g9546	foxk1	157.206	384.184	2.44382	0.00686226	forkhead box protein k1
g13558	foxl1	21.4144	49.6833	2.32009	0.00590649	forkhead box protein l1
g5222	foxm1	7.87457	2.2881	0.290568	0.0497498	forkhead box protein m1
g18792	foxn1	38.0441	11.4705	0.301506	0.000920482	forkhead box protein n1
g26420	foxn2	11.8528	4.66722	0.393766	0.0205691	forkhead box protein n2
g6351	foxn3	100.849	47.0055	0.4661	0.0224813	forkhead box protein n3
g45214	foxo3	10.9623	27.7707	2.53328	0.0126559	forkhead box protein o3 short= 3 short=x 3
g37742	foxo3	49.741	99.0756	1.99183	0.0305735	forkhead box protein o3
g20684	foxo6	17.0194	7.25647	0.426364	0.048382	forkhead box protein o6
g23777	foxp2	93.5399	25.7472	0.275254	2.83235e-05	forkhead box protein p2
g7933	foxp4	1015.49	542.863	0.534582	0.0275987	forkhead box protein p4
g13946	fprp	45.5128	95.0224	2.08782	0.0292944	prostaglandin f2 receptor negative regulator
g20832	fprp	12.4862	2.28118	0.182696	0.0203106	prostaglandin f2 receptor negative regulator
g30820	fr1l4	13.3315	65.7642	4.933	0.0199289	fer-1-like protein 4
g13711	fr1l6	77.2835	23.7903	0.307832	0.0340702	fer-1-like protein 6
g7424	frem1	123.042	52.1659	0.423967	0.046254	fras1-related extracellular matrix protein 1
g8786	frih	140.554	311.562	2.21667	0.00630138	heavy subunit short=ferritin h
g37794	frm4a	5.1098	1.369	0.267917	0.0320092	ferm domain-containing protein 4a
g40559	frm4b	10.3983	33.2834	3.20086	0.00115427	ferm domain-containing protein 4b
g27499	frmd6	146.022	76.7361	0.525509	0.0286115	ferm domain-containing protein 6
g14013	frpa	49.2546	249.164	5.05871	0.0490517	iron-regulated protein frpa
g11230	frpd1	121.999	54.8233	0.449376	0.00970251	ferm and pdz domain-containing protein 1
g15867	frrs1	36.0752	284.016	7.87291	1.47532e-05	ferric-chelate reductase 1
g1615	frrs1	609.163	1574.39	2.58452	0.00142959	ferric-chelate reductase 1
g30479	fry	5.42137	26.5162	4.89105	0.00839563	protein furry homolog
g40805	fryl	2.39561	10.2363	4.27296	0.00363254	protein furry homolog-like
g34923	fryl	7.99783	18.3968	2.30022	0.0380649	protein furry homolog-like
g41753	fscn1	98.4734	445.155	4.52056	7.79199e-05	fascin
g21927	fscn1	6772.16	15454.1	2.28201	0.00888979	fascin
g17011	fstl1	4622.24	1405.37	0.304044	0.00014195	follistatin-related protein 1
g8458	ftcd	29.5148	152.17	5.15573	0.0115433	formimidoyltransferase-cyclodeaminase
g45206	fubp2	9.49912	44.3555	4.66944	1.55161e-05	far upstream element-binding protein 2 short=fuse-binding protein 2
g34615	fubp2	18.1486	47.9846	2.64399	0.00400395	far upstream element-binding protein 2 short=fuse-binding protein 2
g28524	fubp3	42.407	95.297	2.2472	0.0103666	far upstream element-binding protein 3 short=fuse-binding protein 3
g16110	fubp3	747.346	427.112	0.571505	0.0395977	far upstream element-binding protein 3 short=fuse-binding protein 3
g19900	fubp3	98.0768	42.9083	0.437497	0.00384049	far upstream element-binding protein 3 short=fuse-binding protein 3
g41890	fut8	10.3795	3.03535	0.292436	0.00869107	alpha-( )-fucosyltransferase
g17235	fxa1a	337.22	1108.78	3.28801	6.3733e-05	forkhead box protein a1-a short= 1a
g9016	fxc1b	7.17044	19.0629	2.65854	0.0144621	forkhead box protein c1-b
g5482	fxd3a	256.606	453.843	1.76864	0.0338373	forkhead box protein d3-a short= 3-a short= 3a
g23355	fxd5b	7.45152	1.24964	0.167702	0.00625472	forkhead box protein d5-b short= 5-b short= 5b
g7086	fxj1a	4.91991	0.892709	0.181448	0.0238648	forkhead box protein j1-a short= 1-a short= 1a short=x 1
g772	fxl16	17.6323	6.18908	0.351007	0.00818049	f-box lrr-repeat protein 16
g17213	fxl16	82.9414	24.245	0.292315	0.00541652	f-box lrr-repeat protein 16
g13952	fxl19	157.58	84.2771	0.53482	0.0308533	f-box lrr-repeat protein 19
g34989	fxr2	7.98803	28.4813	3.5655	0.00042616	fragile x mental retardation syndrome-related protein 2
g37247	fxr2	13.7253	29.08	2.11871	0.0422295	fragile x mental retardation syndrome-related protein 2
g38032	fyco1	8.11049	18.2645	2.25196	0.0342295	fyve and coiled-coil domain-containing protein 1
g41090	fyn	42.0789	18.027	0.42841	0.0416443	tyrosine-protein kinase fyn
g17531	fyn	290.846	100.579	0.345816	0.000514739	tyrosine-protein kinase fyn
g27889	fyn	36.2132	10.402	0.287244	0.0367585	tyrosine-protein kinase fyn
g27888	fyn	35.7349	4.85009	0.135724	0.00173223	tyrosine-protein kinase fyn
g26491	fyv1	10.9747	26.8324	2.44492	0.0119508	1-phosphatidylinositol-3-phosphate 5-kinase short=phosphatidylinositol-3-phosphate 5-kinase
g43227	fyv1	4.07091	9.79999	2.40732	0.0494127	1-phosphatidylinositol-3-phosphate 5-kinase short=phosphatidylinositol-3-phosphate 5-kinase
g20840	fzd3	86.9047	39.0058	0.448834	0.00947774	frizzled-3 short=fz-3 short=hfz3 flags: precursor
g42279	fzd4	65.1751	145.177	2.2275	0.0109603	frizzled-4 short=fz-4 short=cfz-4 flags: precursor
g13833	fzd6	825.725	338.158	0.409529	0.00180941	frizzled-6 short=fz-6 short=mfz6 flags: precursor
g25776	fzd7a	170.19	95.6884	0.562243	0.0467852	frizzled-7-a short=fz-7-a short=xfz7-a flags: precursor
g5717	g109a	25.6241	210.011	8.19584	0.0176945	g-protein coupled receptor 109a
g17551	g137b	488.049	187.044	0.383248	0.00129839	integral membrane protein gpr137b
g5409	g3st1	4.97151	0.544445	0.109513	0.0052318	galactosylceramide sulfotransferase short= er sulfotransferase
g38189	g3st1	2.12715	0.202162	0.0950388	0.0409488	galactosylceramide sulfotransferase short= er sulfotransferase
g9428	g6pc	5.13611	15.213	2.96197	0.00664133	glucose-6-phosphatase short=g-6-pase short=g6pase
g17139	g6pc3	72.983	166.147	2.27652	0.0152976	glucose-6-phosphatase 3 short=g-6-pase 3 short=g6pase 3
g5056	g6pd	173.189	88.9707	0.51372	0.0216756	glucose-6-phosphate 1-dehydrogenase short=g6pd
g7317	g6pd	1886.87	832.879	0.441408	0.0267354	glucose-6-phosphate 1-dehydrogenase short=g6pd
g25138	g6pe	59.3781	26.3256	0.443355	0.0370313	gdh 6pgl endoplasmic bifunctional protein includes:
g15803	g6pi	48611.3	120411	2.47702	0.00182614	glucose-6-phosphate isomerase short=gpi
g22887	ga2l1	22.3047	5.71654	0.256293	0.0160423	gas2-like protein 1
g9637	ga2l3	45.6678	17.0786	0.373974	0.00253287	gas2-like protein 3
g12315	ga45a	318.768	582.174	1.82632	0.0380993	growth arrest and dna damage-inducible protein gadd45 alpha
g8714	ga45a	65.0669	32.2922	0.496292	0.0381257	growth arrest and dna damage-inducible protein gadd45 alpha
g17880	ga45b	836.425	2723.68	3.25634	0.0233719	growth arrest and dna damage-inducible protein gadd45 beta
g11788	ga45g	2.70134	55.7433	20.6355	0.000811285	growth arrest and dna damage-inducible protein gadd45 gamma
g26313	ga45g	906.715	1655.35	1.82566	0.0485421	growth arrest and dna damage-inducible protein gadd45 gamma
g29783	gab1	21.9016	8.01753	0.36607	0.00702765	grb2-associated-binding protein 1
g22817	gab1	345.348	119.417	0.345789	0.000216024	grb2-associated-binding protein 1
g4113	gab2	10.9508	3.00584	0.274487	0.00880118	grb2-associated-binding protein 2
g8319	galk1	73.8473	132.148	1.78948	0.0379187	galactokinase
g913	galr2	6.7984	0.586341	0.086247	0.0001513	galanin receptor type 2 short=gal2-r short=galr-2
g12977	galt7	220.769	102.988	0.466495	0.00729137	n-acetylgalactosaminyltransferase 7
g20608	gapd1	517.407	276.967	0.535299	0.0291574	gtpase-activating protein and vps9 domain-containing protein 1
g12099	gapr1	242.789	114.652	0.47223	0.00676459	golgi-associated plant pathogenesis-related protein 1 short=gapr-1 short=golgi-associated pr-1 protein
g729	garl3	550.963	292.384	0.530679	0.027911	gtpase-activating rap ran-gap domain-like protein 3
g14840	gas1	477.903	180.247	0.377162	0.00078691	growth arrest-specific protein 1 short=gas-1 flags: precursor
g14631	gas6	77.6264	27.2956	0.351628	0.000854067	growth arrest-specific protein 6 short=gas-6
g3537	gas7	351.088	59.9584	0.170779	0.0050216	growth arrest-specific protein 7 short=gas-7
g1537	gata2	48.3418	23.3247	0.482495	0.0261749	endothelial transcription factor gata-2
g5173	gata6	3815.62	9930.57	2.60261	0.000848652	transcription factor gata-6
g8250	gatb	27.0025	55.5401	2.05685	0.0188694	probable glutamyl-trna amidotransferase subunit mitochondrial short=glu-adt subunit b
g43857	gatl3	21.9001	52.573	2.40059	0.0141356	gats-like protein 3
g15099	gatl3	172.693	312.75	1.81102	0.0458353	gats-like protein 3
g38890	gbb1	0.792872	42.2447	53.2806	1.03677e-15	guanine nucleotide-binding protein g g g subunit beta-1
g39799	gbb4	2.65407	44.4731	16.7566	2.21557e-11	guanine nucleotide-binding protein subunit beta-4
g6188	gbb5	24.7413	2.81704	0.11386	0.00148192	guanine nucleotide-binding protein subunit beta-5
g12314	gbg12	345.386	93.6321	0.271094	0.00895831	guanine nucleotide-binding protein g g g subunit gamma-12
g22390	gblp	11952.6	34388.8	2.87711	0.000274374	guanine nucleotide-binding protein subunit beta-2-like 1
g4690	gblp	2135.36	5414.69	2.53573	0.00131624	guanine nucleotide-binding protein subunit beta-2-like 1
g22646	gbp1	522.119	192.67	0.369015	0.00109192	interferon-induced guanylate-binding protein 1
g19746	gbp4	30.2542	12.1292	0.400911	0.0100109	guanylate-binding protein 4
g23573	gbp6	81.2593	21.658	0.266529	0.000782732	guanylate-binding protein 6
g5261	gbra6	32.4405	63.1859	1.94775	0.0364979	gamma-aminobutyric acid receptor subunit alpha-6
g4168	gbrb1	36.0608	148.275	4.1118	0.000131415	gamma-aminobutyric acid receptor subunit beta-1
g3104	gbrg3	6.04491	0.412958	0.068315	0.00116123	gamma-aminobutyric acid receptor subunit gamma-3
g45791	gbrl2	61.8356	204.009	3.29922	0.000160448	gamma-aminobutyric acid receptor-associated 2
g14183	gbrp	2.42204	0	0	0.0261854	gamma-aminobutyric acid receptor subunit pi
g39269	gcn1l	7.59315	21.6177	2.847	0.00724798	translational activator gcn1 short= 1
g45787	gcn1l	7.11046	17.7253	2.49285	0.0187102	translational activator gcn1 short= 1
g37734	gcn1l	6.99907	16.5889	2.37015	0.0363441	translational activator gcn1 short= 1
g7884	gcnt3	8.59076	19.8654	2.31241	0.0265434	beta- -galactosyl-o-glycosyl-glycoprotein beta- -n-acetylglucosaminyltransferase 3
g2867	gcom1	618.475	1124.82	1.8187	0.0382688	grinl1a complex locus protein 1
g40082	gcp3	11.5942	24.3777	2.10259	0.0307252	gamma-tubulin complex component 3 homolog
g42057	gcp6	9.96641	3.56655	0.357857	0.0338668	gamma-tubulin complex component 6 short=gcp-6
g24697	gcr	256.905	118.026	0.459414	0.00414426	glucocorticoid receptor short=gr
g9292	gcya2	31.7311	13.5851	0.428131	0.00823652	guanylate cyclase soluble subunit alpha-2 short=gcs-alpha-2
g1818	gcyb1	228.285	501.074	2.19495	0.00676276	guanylate cyclase soluble subunit beta-1 short=gcs-beta-1
g6924	gd1l1	1.50461	5.9674	3.96607	0.0187845	ganglioside-induced differentiation-associated protein 1-like 1 short=gdap1-l1
g24905	gdia	388.376	166.263	0.428098	0.00345493	rab gdp dissociation inhibitor alpha short=rab gdi alpha
g14722	gdia	41.4691	17.7037	0.426912	0.0068478	rab gdp dissociation inhibitor alpha short=rab gdi alpha
g33729	gdir1	121.207	263.821	2.1766	0.0087119	rho gdp-dissociation inhibitor 1 short=rho gdi 1
g33496	gdir1	80.8916	43.1475	0.533399	0.0312823	rho gdp-dissociation inhibitor 1 short=rho gdi 1
g20756	gdir1	215.669	114.969	0.533079	0.028045	rho gdp-dissociation inhibitor 1 short=rho gdi 1
g34640	gdir1	21.6441	10.2339	0.472829	0.0330609	rho gdp-dissociation inhibitor 1 short=rho gdi 1
g35168	gdir2	87.8666	41.4829	0.472112	0.030064	rho gdp-dissociation inhibitor 2 short=rho gdi 2
g10352	gdir2	2931.25	949.1	0.323786	0.0100927	rho gdp-dissociation inhibitor 2 short=rho gdi 2
g36867	gdn	288.875	162.646	0.563033	0.0418674	glia-derived nexin short=gdn
g23554	gdpd2	6.58614	0.932567	0.141595	0.00376829	glycerophosphoinositol inositolphosphodiesterase gdpd2
g36134	gdpd5	58.5921	157.002	2.67958	0.019453	glycerophosphodiester phosphodiesterase domain-containing protein 5
g29947	gdpd5	42.1326	111.501	2.64644	0.00871652	glycerophosphodiester phosphodiesterase domain-containing protein 5
g7420	gds1	265.306	135.61	0.511144	0.0462934	rap1 gtpase-gdp dissociation stimulator 1
g25589	gels	1146.66	633.926	0.552847	0.040506	gelsolin
g6266	gels	2700.99	1324.96	0.490547	0.0425667	gelsolin
g35187	gemi8	4.80124	14.5789	3.03649	0.00901537	gem-associated protein 8 short=gemin-8
g40432	gemi8	5.31907	1.27912	0.240478	0.0214002	gem-associated protein 8 short=gemin-8
[truncated: 6,198 more rows]
